# Supplementary material for: Late-life restoration of mitochondrial function reverses cardiac dysfunction in old mice
Source: bioRxiv preprint, doi:10.1101/2020.01.02.893008, version 2 (2020-02-14)
Supplement: Table S3 [file 893008_file04.csv]

Peptide	UniProtKB_short	geneid	geneid.short	ipi	embl	ensembl	Peptide.name	pir	refseq	unigene	kegg	go.category	go.id	pathway	protein.family	cell.location	OSS/OCL log2.fold.change	OSS/OCL Std. Error	OSS/OCL t value	OSS/OCL unadj p.	OSS/OCL DF	OSS/OCL log2 Avg denominator	OSS/OCL log2 Avg numerator	OSS/OCL Residual Std. Error	OSS/OCL stdev denominator	OSS/OCL CV denominator	OSS/OCL stdev numerator	OSS/OCL CV numerator	OSS/OCL AUC stdev denominator	OSS/OCL AUC CV denominator	OSS/OCL AUC stdev numerator	OSS/OCL AUC CV numerator	OSS/OCL mean(yauc[denominator])	OSS/OCL mean(yauc[numerator])	YSS/OCL log2.fold.change	YSS/OCL Std. Error	YSS/OCL t value	YSS/OCL unadj p.	YSS/OCL DF	YSS/OCL log2 Avg denominator	YSS/OCL log2 Avg numerator	YSS/OCL Residual Std. Error	YSS/OCL stdev denominator	YSS/OCL CV denominator	YSS/OCL stdev numerator	YSS/OCL CV numerator	YSS/OCL AUC stdev denominator	YSS/OCL AUC CV denominator	YSS/OCL AUC stdev numerator
AAAAAAAAAAAAAAAASAGGK	Q64HY3	Sp9	Sp9	IPI00468231;IPI00968946;	AY591908;AJ844915;AL954713;BC139398;BC139407;	ENSMUST00000090813;	Transcription factor Sp9		NP_001005343.1;	Mm.330293;	mmu:381373;	DNA binding; embryonic limb morphogenesis; metal ion binding; nucleus; regulation of transcription, DNA-dependent; transcription, DNA-dependent; zinc ion binding	GO:0003677; GO:0030326; GO:0046872; GO:0005634; GO:0006355; GO:0006351; GO:0008270		Sp1 C2H2-type zinc-finger protein family	Nucleus.	0.554711485360472	0.336280394589621	1.64955047717668	0.115470086564072	19	-2.56561456728808	-2.01090308192761	0.770515181468279	0.372087879199701	0.145028752153137	1.13258999203447	0.563224554287716	68465.3853180224	0.295058013566922	492919.938009263	1.05385769405375	232040.419747806	467729.125849244	-0.050864232392777	0.210295775321651	-0.241869967739387	0.81122718872839	21	-2.56561456728808	-2.61647879968086	0.50427155425353	0.372087879199701	0.145028752153137	0.631386570206336	0.241311555929041	68465.3853180224	0.295058013566922	145103.275047908
AAAADHRQELIECVANSDEQLGELFLEEK	Q8K0D5	Gfm1 Efg Efg1 Gfm	Gfm1	IPI00230283;	AF315511;BC013093;BC031772;	ENSMUST00000077271;	Elongation factor G, mitochondrial (EF-Gmt) (Elongation factor G 1, mitochondrial) (mEF-G 1) (Elongation factor G1)		NP_613057.2;	Mm.122466;	mmu:28030;	GTP binding; GTPase activity; mitochondrial translational elongation; mitochondrion; translation elongation factor activity	GO:0005525; GO:0003924; GO:0070125; GO:0005739; GO:0003746	Protein biosynthesis; polypeptide chain elongation.	GTP-binding elongation factor family, EF-G/EF-2 subfamily	Mitochondrion.	-0.00701450314547185	0.0747325686750845	-0.0938613949691583	0.925258508395479	479	0.104180919823131	0.0971664166776586	0.838871002847162	1.55513828005769	14.9272849836405	1.568032919261	16.1376015795953	6865388.31734862	2.20262285153026	6651096.06497355	2.07981263389612	3116915.05088078	3197930.40804547	0.00278943547650023	0.0676575009732431	0.0412287689668495	0.967129133592694	527	0.104180919823131	0.106970355299628	0.794795675904396	1.55513828005769	14.9272849836405	1.56752299111903	14.6538074658941	6865388.31734862	2.20262285153026	4888530.9343739
AAAAELLAQTTHFLHDPK	Q9R1Y5	Hic1	Hic1	IPI00129231;	AF036334;AF036582;AL603905;AJ132691;	ENSMUST00000055619;	Hypermethylated in cancer 1 protein (Hic-1)		NP_001091673.1;NP_034560.2;	Mm.57250;	mmu:15248;	Wnt receptor signaling pathway; chromatin; histone deacetylase binding; intrinsic apoptotic signaling pathway in response to DNA damage; metal ion binding; multicellular organismal development; negative regulation of Wnt receptor signaling pathway; negative regulation of transcription from RNA polymerase II promoter; nucleus; positive regulation of DNA damage response, signal transduction by p53 …	GO:0016055; GO:0000785; GO:0042826; GO:0008630; GO:0046872; GO:0007275; GO:0030178; GO:0000122; GO:0005634; GO:0043517; GO:0043565; GO:0003700; GO:0006351; GO:0008270		Krueppel C2H2-type zinc-finger protein family, Hic subfamily	Nucleus.	0.154339124491397	0.161055945234762	0.958295108363901	0.343817349731605	39	0.719107375759675	0.873446500251072	0.521880909501734	1.07736261621328	1.49819436224686	1.31087393609977	1.50080621506064	3223117.57462247	1.04261582932213	3479712.78643479	0.900056954693171	3091376.02171071	3866102.88192376	-0.289371512705363	0.145151973592844	-1.99357615017388	0.052566429466675	43	0.719107375759675	0.429735863054312	0.492234291304276	1.07736261621328	1.49819436224686	1.00838888741868	2.34653184458853	3223117.57462247	1.04261582932213	1958804.00944933
AAADEWTTCTPPSGLQGK	A2ASS6	Ttn	Ttn	IPI00749707;IPI00753639;IPI00756257;	AL928681;AL928721;AL928789;AL928681;AL928721;AL928789;AL928681;AL928721;AL928721;AL928681;AL928789;AL928721;AL928681;AL928789;AL928721;AL928681;AL928789;AL928681;AL928721;AL928789;AL928681;AL928721;	ENSMUST00000011934;ENSMUST00000099980;ENSMUST00000099981;	Titin (EC 2.7.11.1) (Connectin)			Mm.373672;Mm.446279;Mm.473358;		ATP binding; M band; Rho guanyl-nucleotide exchange factor activity; Z disc; adult heart development; calcium ion binding; cardiac muscle fiber development; cardiac muscle tissue morphogenesis; cardiac myofibril assembly; condensed nuclear chromosome; forward locomotion; heart morphogenesis; in utero embryonic development; mitotic chromosome condensation; muscle contraction; muscle myosin complex…	GO:0005524; GO:0031430; GO:0005089; GO:0030018; GO:0007512; GO:0005509; GO:0048739; GO:0055008; GO:0055003; GO:0000794; GO:0043056; GO:0003007; GO:0001701; GO:0007076; GO:0006936; GO:0005859; GO:0003676; GO:0004674; GO:0004713; GO:0035023; GO:0045859; GO:0051592; GO:0045214; GO:0048769; GO:0030241; GO:0030240; GO:0001756; GO:0005865; GO:0005200		Protein kinase superfamily, CAMK Ser/Thr protein kinase family	Cytoplasm. Nucleus.	0.0826371050584294	0.0147256971047305	5.61176183855384	2.03644851884469e-08	15779	-1.02227193195806	-0.939634826899654	0.947750487449708	2.14213605453866	2.09546597883755	2.08920066428777	2.22341765596442	8304818.93173704	3.70515313886715	8567668.01700124	3.57694609514658	2241423.93592839	2395246.61236198	0.406028174244584	0.0148503920458865	27.3412427759476	3.50789352413118e-161	17357	-1.02227193195806	-0.616243757713536	1.00025410642162	2.14213605453866	2.09546597883755	2.02747579721373	3.2900549041443	8304818.93173704	3.70515313886715	8017123.31189207
AAADQDREAVLKK	Q60936	Adck3 Cabc1	Adck3	IPI00122554;IPI00816885;	AJ278735;AK004791;AK014605;U31629;	ENSMUST00000027766;ENSMUST00000170472;	Chaperone activity of bc1 complex-like, mitochondrial (Chaperone-ABC1-like) (EC 2.7.11.-) (aarF domain-containing protein kinase 3)		NP_001156762.1;NP_075830.2;	Mm.38330;	mmu:67426;	ATP binding; mitochondrion; protein serine/threonine kinase activity	GO:0005524; GO:0005739; GO:0004674		Protein kinase superfamily, ADCK protein kinase family	Mitochondrion.	-0.158753586515016	0.07303011982383	-2.17380974997681	0.0305037912864404	299	0.637359039213155	0.478605452698139	0.648078023170655	1.38050987950904	2.1659846249507	1.52803372630044	3.19267930961953	3016598.6699185	0.949281386600619	3054163.71626869	0.939058518514357	3177770.7985205	3252367.83017586	0.0975330563943303	0.0712566422070889	1.36875740104166	0.172008948813449	329	0.637359039213155	0.734892095607486	0.661766693258854	1.38050987950904	2.1659846249507	1.41257778184386	1.92215672244532	3016598.6699185	0.949281386600619	3096353.61870411
AAAEVNQEYGLDPK	P97807	Fh Fh1	Fh	IPI00129928;IPI00759940;	AK147000;CH466555;BC006048;U72679;	ENSMUST00000027810;	Fumarate hydratase, mitochondrial (Fumarase) (EC 4.2.1.2) (EF-3)		NP_034339.2;	Mm.41502;	mmu:14194;	fumarate hydratase activity; fumarate metabolic process; homeostasis of number of cells within a tissue; malate metabolic process; mitochondrion; tricarboxylic acid cycle; tricarboxylic acid cycle enzyme complex	GO:0004333; GO:0006106; GO:0048873; GO:0006108; GO:0005739; GO:0006099; GO:0045239	Carbohydrate metabolism; tricarboxylic acid cycle; (S)-malate from fumarate: step 1/1.	Class-II fumarase/aspartase family, Fumarase subfamily	Mitochondrion. Cytoplasm.	-0.140241569485688	0.0611063835574049	-2.29503959032269	0.0219460399915242	959	1.42808048352889	1.28783891404321	0.970033766468519	2.36919371871999	1.65900573955435	2.5757133691376	2.00002759743536	20889902.834007	1.87370020485372	23136365.0678257	1.89917273671869	11149010.2738383	12182338.4574274	0.128680879546334	0.0540188528723607	2.382147578187	0.017388414984496	1055	1.42808048352889	1.55676136307522	0.897428584634024	2.36919371871999	1.65900573955435	2.46492708693747	1.5833686173122	20889902.834007	1.87370020485372	22879545.2924337
AAAFEDQENETVVVK	P26039	Tln1 Tln	Tln1	IPI00465786;	X56123;AL732506;BC018557;BC150810;	ENSMUST00000030187;	Talin-1	S11661;	NP_035732.2;	Mm.208601;	mmu:21894;	actin cytoskeleton; cell adhesion; cell-substrate junction assembly; centrosome; cortical actin cytoskeleton organization; cytoskeletal anchoring at plasma membrane; focal adhesion; intracellular membrane-bounded organelle; ruffle; ruffle membrane; structural constituent of cytoskeleton	GO:0015629; GO:0007155; GO:0007044; GO:0005813; GO:0030866; GO:0007016; GO:0005925; GO:0043231; GO:0001726; GO:0032587; GO:0005200			Cell projection › ruffle membrane; Peripheral membrane protein; Cytoplasmic side. Cytoplasm › cytoskeleton.	-0.805039683574944	0.0762157656620893	-10.5626398499252	3.81539247890467e-25	1399	-0.185671203605205	-0.990710887180151	1.46107829317289	2.52507823232013	13.5997299704548	2.73631479095673	2.76197105166076	16687555.2485318	3.78047391695139	17305464.3776874	4.16196010476327	4414143.73306635	4158008.23219849	-0.92605119812347	0.0703038419992973	-13.1721278921389	1.26871835986073e-37	1539	-0.185671203605205	-1.11172240172867	1.41046398587292	2.52507823232013	13.5997299704548	2.90073187067013	2.60922318931385	16687555.2485318	3.78047391695139	18700617.8269681
AAAFVTSPPLSPDPTTPDFLNSLLSCGDLQVTGSAHCTFNTAQK	O08553	Dpysl2 Crmp2 Ulip2	Dpysl2	IPI00114375;	Y10339;BC062955;	ENSMUST00000022629;	Dihydropyrimidinase-related protein 2 (DRP-2) (Unc-33-like phosphoprotein 2) (ULIP-2)		NP_034085.2;	Mm.352648;Mm.475100;	mmu:12934;	axon; cytoskeleton organization; cytosol; dendrite; growth cone; hydrolase activity, acting on carbon-nitrogen (but not peptide) bonds, in cyclic amides; mitochondrion; neuronal cell body; olfactory bulb development; positive regulation of glutamate secretion; protein complex; pyrimidine nucleobase catabolic process; regulation of neuron differentiation; response to amphetamine; response to cocai…	GO:0030424; GO:0007010; GO:0005829; GO:0030425; GO:0030426; GO:0016812; GO:0005739; GO:0043025; GO:0021772; GO:0014049; GO:0043234; GO:0006208; GO:0045664; GO:0001975; GO:0042220; GO:0042493; GO:0021510; GO:0048489; GO:0043195		DHOase family, Hydantoinase/dihydropyrimidinase subfamily	Cytoplasm.	0.296078528971019	0.0563575949419117	5.25356927094191	2.56315063027884e-07	359	0.354913015927986	0.650991544899006	0.547858438806648	1.53431057823631	4.32306088922822	1.45887401567015	2.24100301624728	2789686.55140106	1.00150210331399	2700941.71017455	0.809671192848038	2785502.43895639	3335850.0759721	-0.0825628249136053	0.0657635104972399	-1.25545039018363	0.210057475475061	395	0.354913015927986	0.27235019101438	0.669044743561505	1.53431057823631	4.32306088922822	1.69477770153902	6.22278873837667	2789686.55140106	1.00150210331399	2199085.19527934
AAAGELQEDSGLHVLAR	Q8C845	Efhd2 RP23-423G13.3-001	Efhd2	IPI00226872;	BC125303;AK048475;AK150207;AK159367;AK167267;AK169409;AL645731;	ENSMUST00000036854;	0		NP_080270.2;	Mm.395598;	mmu:27984;	calcium ion binding	GO:0005509				0.115522639756477	0.781940496346334	0.147738402469578	0.884105776807556	19	1.64946018077754	1.76498282053401	1.79165075672921	1.75155454020162	1.06189561931465	1.72035794340865	0.974716537404109	5313741.49472509	0.827314851334062	9561673.24503988	1.05691089637398	6422876.95688839	9046811.11515056	0.485942448327859	0.597928364753829	0.812710145517055	0.425502378138463	21	1.64946018077754	2.13540262910539	1.43378185018462	1.75155454020162	1.06189561931465	0.790256750257093	0.370073886528914	5313741.49472509	0.827314851334062	5208161.85781176
AAAGTIQTSVQEVNSK	J3QP71	Bsg	Bsg			ENSMUST00000178383;	0					acrosomal membrane	GO:0002080				-0.182660473868324	0.0793827118207534	-2.3010107576165	0.0268221106498817	39	1.12766163825816	0.94500116438984	0.25722938562337	0.207134165279738	0.183684678322202	0.370271627379516	0.391821345128807	1480583.65707314	0.47482140369362	1218943.6840578	0.409652414958501	3118190.64085092	2975555.95804626	-0.0257878769848271	0.0565753189586402	-0.455814964183932	0.650816711741761	43	1.12766163825816	1.10187376127334	0.19185624103903	0.207134165279738	0.183684678322202	0.23406888786426	0.212428044020004	1480583.65707314	0.47482140369362	1141351.88670495
AAAHCAHVFTTVSQITAIEAQHLLK	Q9Z1E4	Gys1 Gys Gys3	Gys1	IPI00130127;	X94616;U53218;AK050813;AK171148;CH466603;BC019389;BC131687;BC131688;BC152550;	ENSMUST00000003964;	Glycogen [starch] synthase, muscle (EC 2.4.1.11)		NP_109603.2;	Mm.275654;	mmu:14936;	cytoplasm; glucose binding; glycogen (starch) synthase activity; glycogen biosynthetic process; heart development; inclusion body	GO:0005737; GO:0005536; GO:0004373; GO:0005978; GO:0007507; GO:0016234	Glycan biosynthesis; glycogen biosynthesis.	Glycosyltransferase 3 family		0.310429981582463	0.0974555238139158	3.18535029553796	0.00158867004410495	319	-0.737505724792525	-0.427075743210063	0.893194629537681	1.7657843469999	2.39426527502095	1.66167400101686	3.89081802803195	2314597.28444066	1.43649011108524	3027783.50424749	1.48372041046482	1611286.61212434	2040669.84783133	0.041749502226524	0.0932167362203884	0.447875606026556	0.654519276713816	351	-0.737505724792525	-0.695756222566002	0.89410352413213	1.7657843469999	2.39426527502095	1.69965269654355	2.44288536906662	2314597.28444066	1.43649011108524	1545588.79894287
AAAHHYGAQCDKTNKEFMLCR	Q9DCJ5	Ndufa8	Ndufa8	IPI00120984;	AK002744;AL773525;BC012416;BC024673;	ENSMUST00000070112;	NADH dehydrogenase [ubiquinone] 1 alpha subcomplex subunit 8 (Complex I-19kD) (CI-19kD) (Complex I-PGIV) (CI-PGIV) (NADH-ubiquinone oxidoreductase 19 kDa subunit)		NP_080979.1;	Mm.19834;	mmu:68375;	electron transport chain; mitochondrial inner membrane; mitochondrial intermembrane space; mitochondrial respiratory chain complex I	GO:0022900; GO:0005743; GO:0005758; GO:0005747		Complex I NDUFA8 subunit family	Mitochondrion. Mitochondrion intermembrane space.	-0.262462721374913	0.0887964993801299	-2.95577779762841	0.00336705750499583	299	0.996102597604019	0.733639876229104	0.787990762189206	2.26186449862362	2.27071438631343	2.21776552959223	3.02296208460138	8867544.94337446	1.37901846458176	7081198.75038993	1.28033453005462	6430330.82668973	5530741.05568945	-0.0824349349508412	0.0902212340561024	-0.913697710004505	0.361544809847755	329	0.996102597604019	0.913667662653182	0.837892523050998	2.26186449862362	2.27071438631343	2.27786574223802	2.49310097680744	8867544.94337446	1.37901846458176	8326402.04404925
AAANEQLTR	Q9CRB9	Chchd3	Chchd3	IPI00133562;	AK002263;AK003519;BC021941;	ENSMUST00000066379;	Coiled-coil-helix-coiled-coil-helix domain-containing protein 3, mitochondrial		NP_079612.1;	Mm.21501;	mmu:66075;	RNA polymerase II transcription regulatory region sequence-specific DNA binding transcription factor activity involved in negative regulation of transcription; inner mitochondrial membrane organization; mitochondrial fusion; mitochondrial inner membrane; nucleus; phosphatase binding; protein complex scaffold	GO:0001227; GO:0007007; GO:0008053; GO:0005743; GO:0005634; GO:0019902; GO:0032947			Mitochondrion inner membrane; Lipid-anchor; Intermembrane side. Cytoplasm. Nucleus.	-0.290151794219239	0.0885792588652183	-3.27561776804582	0.00117829234409699	299	0.581990911310817	0.291839117091579	0.786062943861699	1.38919381393512	2.38696822740109	1.44794428503331	4.96144690767737	3500493.40795399	1.08110029354543	4329930.92950438	1.40964519799451	3237898.85994225	3071645.92598516	-0.0679607805808192	0.0816271900730053	-0.832575279389586	0.405688256476568	329	0.581990911310817	0.514030130729997	0.758078881932648	1.38919381393512	2.38696822740109	1.26170315361636	2.45453151126484	3500493.40795399	1.08110029354543	2608248.21016184
AAAPAPAPAPGRSHHWPALASA	O35455	Nkx2-6 Nkx2.6	Nkx2-6	IPI00130799;	AF030113;		0			Mm.390691;		nucleus; sequence-specific DNA binding; sequence-specific DNA binding transcription factor activity	GO:0005634; GO:0043565; GO:0003700			Nucleus.	1.05766008666657	1.17238696844291	0.902142479518761	0.37827594963105	19	-3.88422617573798	-2.82656608907141	2.68627601333473	3.26032619831816	0.839375991718278	0.503750795209497	0.178220066092631	1507379.77941159	2.70900883710362	75822.418040693	0.349692284796475	556432.211946283	216826.110661328	0.781162378886657	1.05465723808859	0.740678915078039	0.467089837932417	21	-3.88422617573798	-3.10306379685133	2.52897921435759	3.26032619831816	0.839375991718278	0.704641374274802	0.227079241809273	1507379.77941159	2.70900883710362	59753.5684135654
AAAPAPEEEMDECEQALAAEPK	Q9D8N0	Eef1g	Eef1g	IPI00318841;	AF321126;AK007869;AK011973;AK014277;AK050636;AK081859;BC083071;	ENSMUST00000052248;	Elongation factor 1-gamma (EF-1-gamma) (eEF-1B gamma)		NP_080283.3;	Mm.247762;Mm.379129;	mmu:67160;	eukaryotic translation elongation factor 1 complex; translation elongation factor activity	GO:0005853; GO:0003746				0.203100868981766	0.121883005456894	1.66635921243013	0.0966890745600563	299	-0.669142438860821	-0.466041569879056	1.08160437673042	2.81215409293219	4.202624029825	2.51055628177555	5.38697928261436	11041249.4330808	2.5649343903386	11581870.9503541	2.47459503715761	4304690.78455581	4680309.61690497	-0.0926672179104574	0.127645294913669	-0.725974411929022	0.468370579773506	329	-0.669142438860821	-0.761809656771277	1.18545306246084	2.81215409293219	4.202624029825	2.72765935515616	3.58049984128136	11041249.4330808	2.5649343903386	9645940.0548669
AAASTDYYK	P35486	Pdha1 Pdha-1	Pdha1	IPI00337893;	M76727;BC007142;	ENSMUST00000033662;	Pyruvate dehydrogenase E1 component subunit alpha, somatic form, mitochondrial (EC 1.2.4.1) (PDHE1-A type I)	S23506;	NP_032836.1;	Mm.34775;	mmu:18597;	glycolysis; mitochondrial matrix; mitochondrion; pyruvate dehydrogenase (acetyl-transferring) activity; pyruvate dehydrogenase activity	GO:0006096; GO:0005759; GO:0005739; GO:0004739; GO:0004738			Mitochondrion matrix.	-0.200871278749825	0.0400327506828018	-5.01767366278231	6.20949254390299e-07	979	2.60331197100901	2.40244069225919	0.642085885984321	2.41979993528782	0.929508242667487	2.35890694515052	0.981879366575442	25425665.2590011	1.22512289163446	22966377.6395114	1.19800941324212	20753563.1181296	19170448.4001996	-0.180667219133579	0.0497632467188125	-3.63053520511714	0.000296131248532121	1077	2.60331197100901	2.42264475187544	0.835296515607643	2.41979993528782	0.929508242667487	2.4742674219738	1.02130839449672	25425665.2590011	1.22512289163446	22121474.6016757
AAATKEPVFIPRPGITYEPPK	O70468	Mybpc3	Mybpc3	IPI00895002;	AF059576;AF097333;		Myosin-binding protein C, cardiac-type (Cardiac MyBP-C) (C-protein, cardiac muscle isoform)			Mm.10728;		cell adhesion; metal ion binding; myosin filament	GO:0007155; GO:0046872; GO:0032982		Immunoglobulin superfamily, MyBP family		0.246906494199928	0.0419917432355845	5.87988197619515	5.2737056209678e-09	1239	0.126690949842346	0.373597444042269	0.757599013818023	1.62787101348053	12.8491499630104	1.63039221165783	4.36403470542311	2845534.87231412	1.1257577312734	3588562.07220099	1.12327168146168	2527661.8523378	3194740.979788	0.47184960079729	0.0429096445242053	10.9963530583694	5.22727746783048e-27	1363	0.126690949842346	0.598540550639646	0.810185905810229	1.62787101348053	12.8491499630104	1.67613382457578	2.80036803318428	2845534.87231412	1.1257577312734	6012013.50337285
AAATLMTER	P04919	Slc4a1 Ae1	Slc4a1	IPI00120761;IPI00230594;	X02677;M29379;J02756;BC052419;BC053429;X03917;	ENSMUST00000006749;	Band 3 anion transport protein (Anion exchange protein 1) (AE 1) (Anion exchanger 1) (MEB3) (Solute carrier family 4 member 1) (CD antigen CD233)	A25314;	NP_035533.1;	Mm.7248;	mmu:20533;	Z disc; anion:anion antiporter activity; basolateral plasma membrane; chloride transmembrane transporter activity; cortical cytoskeleton; inorganic anion exchanger activity; integral to plasma membrane	GO:0030018; GO:0015301; GO:0016323; GO:0015108; GO:0030863; GO:0005452; GO:0005887		Anion exchanger (TC 2.A.31) family	Membrane; Multi-pass membrane protein.	-0.780385870605845	0.153446881123673	-5.08570695533969	7.03391356592099e-07	259	0.0636319214994772	-0.716753949106361	1.26767928457448	2.58129908804161	40.5661031006712	2.70389746878608	3.77242074795299	6956523.15877465	1.57026595840451	5578609.84483706	1.67180581893625	4430156.00098911	3336876.67649504	-0.608574112070134	0.136463982015853	-4.45959514796686	1.18254431790346e-05	285	0.0636319214994772	-0.544942190570662	1.17984141920633	2.58129908804161	40.5661031006712	2.38279806033826	4.37257034153108	6956523.15877465	1.57026595840451	4511225.5599405
AAATSAVPAPNHQPEVFCNQIFINNEWHDAVSR	P47738	Aldh2 Ahd-1 Ahd1	Aldh2	IPI00111218;	U07235;S71509;BC005476;	ENSMUST00000031411;	Aldehyde dehydrogenase, mitochondrial (EC 1.2.1.3) (AHD-M1) (ALDH class 2) (ALDH-E2) (ALDHI)	I48966;	NP_033786.1;	Mm.284446;	mmu:11669;	aldehyde dehydrogenase (NAD) activity; cellular response to fatty acid; cellular response to hormone stimulus; ethanol catabolic process; liver development; mitochondrial matrix; mitochondrion; response to hyperoxia; response to lipopolysaccharide; response to nicotine; response to progesterone stimulus; response to testosterone stimulus	GO:0004029; GO:0071398; GO:0032870; GO:0006068; GO:0001889; GO:0005759; GO:0005739; GO:0055093; GO:0032496; GO:0035094; GO:0032570; GO:0033574	Alcohol metabolism; ethanol degradation; acetate from ethanol: step 2/2.	Aldehyde dehydrogenase family	Mitochondrion matrix.	0.0829749416567069	0.0511439823558975	1.62237936575424	0.10517305170271	699	1.05496242754196	1.13793736919867	0.69327927173091	2.24549181493591	2.12850406451712	2.25713242346067	1.98352957250198	13220878.4701603	1.64411892356632	13737400.4501365	1.59148808737051	8041315.1875184	8631795.96451377	-0.0952991338541906	0.0482858343835353	-1.97364579220539	0.0487796218272528	769	1.05496242754196	0.959663293687767	0.684995447193252	2.24549181493591	2.12850406451712	2.35369818775059	2.4526291702852	13220878.4701603	1.64411892356632	11736564.5069224
AAAVHLMQ	A3KMP2	Ttc38	Ttc38	IPI00672046;IPI00762806;	AK133636;BC024550;BC030849;BC132621;BC132623;	ENSMUST00000146088;	Tetratricopeptide repeat protein 38 (TPR repeat protein 38)		NP_001028509.2;	Mm.151748;	mmu:239570;				TTC38 family		0.228366371458704	0.178332598154145	1.28056437141857	0.201701291701347	219	-1.0809459783684	-0.852579606909696	1.35521041681525	1.6925637953804	1.56581719091568	1.86743649393736	2.19033680702986	3248586.11906688	2.17423893551747	4516289.01379319	2.00746017085321	1494125.62989252	2249752.73699885	0.26086309737185	0.168594507767866	1.54728111149994	0.123107603564193	241	-1.0809459783684	-0.820082880996546	1.34082990499548	1.6925637953804	1.56581719091568	1.90429005719446	2.32207024597369	3248586.11906688	2.17423893551747	4451323.88923618
AAAVPVEFK	Q91VA7	Idh3b mCG_9915 RP23-20A6.5-001	Idh3b	IPI00126635;	BC009022;AY035212;AL833804;CH466519;	ENSMUST00000028892;	0		NP_570954.1;	Mm.29590;	mmu:170718;	2-oxoglutarate metabolic process; NAD binding; NADH metabolic process; isocitrate dehydrogenase (NAD+) activity; isocitrate metabolic process; magnesium ion binding; mitochondrion; tricarboxylic acid cycle	GO:0006103; GO:0051287; GO:0006734; GO:0004449; GO:0006102; GO:0000287; GO:0005739; GO:0006099		Isocitrate and isopropylmalate dehydrogenases family		-0.0914442933188945	0.072191472843273	-1.26669106083234	0.205881358161619	479	2.07007603800171	1.97863174468282	0.810347272878368	2.39074128070811	1.15490505508964	2.32536052577624	1.17523664119167	104178053.459775	3.74808280979539	38126159.6410732	2.17092501141911	27795024.4822533	17562172.5488116	0.0322268291375057	0.0655521855512694	0.491620971390811	0.623192008833082	527	2.07007603800171	2.10230286713922	0.770063819573177	2.39074128070811	1.15490505508964	2.30662834267836	1.09719126522297	104178053.459775	3.74808280979539	33862259.0743001
AAAVSDIQDLMR	Q9CR00	Psmd9	Psmd9	IPI00113287;	AK002280;AK010276;AK168863;BC051930;BC060245;	ENSMUST00000100729;	26S proteasome non-ATPase regulatory subunit 9 (26S proteasome regulatory subunit p27)		NP_080276.2;	Mm.278997;	mmu:67151;	bHLH transcription factor binding; negative regulation of insulin secretion; nucleus; positive regulation of insulin secretion; positive regulation of transcription, DNA-dependent; proteasome regulatory particle assembly; transcription coactivator activity	GO:0043425; GO:0046676; GO:0005634; GO:0032024; GO:0045893; GO:0070682; GO:0003713		Proteasome subunit p27 family		-0.152992624651664	0.125263848446573	-1.22136295945688	0.224849195826196	99	-0.425358913446432	-0.578351538098096	0.641786243893329	1.58483360581425	3.72587374030389	1.83167297941014	3.16705819687725	2078186.4199933	1.17738417736321	2028761.6238789	1.13583156724147	1765087.77674206	1786146.54002446	-0.14665215274108	0.085001693082936	-1.72528507871004	0.0873101784503711	109	-0.425358913446432	-0.572011066187511	0.45577080317333	1.58483360581425	3.72587374030389	1.47342811637181	2.5758734462819	2078186.4199933	1.17738417736321	1653089.89266513
AAAYAAEANDHELAQAILDGASITLPHGTLCECYDELGNR	Q91WB7	Ubtd1	Ubtd1	IPI00127935;	AK078479;BC016129;	ENSMUST00000026170;	Ubiquitin domain-containing protein 1		NP_663475.1;	Mm.22948;	mmu:226122;						-0.0172464061179887	0.347030358119369	-0.0496971106834878	0.960882482019406	19	4.51319814952482	4.49595174340683	0.795146442264821	0.733390305007481	0.162499026346693	0.834742046176443	0.185665259285882	26121616.8739337	0.687327786828184	19708646.5844342	0.523779416202385	38004598.933032	37627760.7992502	0.125127191296296	0.295173854261609	0.423910144783344	0.67594199651578	21	4.51319814952482	4.63832534082111	0.707802037562769	0.733390305007481	0.162499026346693	0.657210581323205	0.141691350440472	26121616.8739337	0.687327786828184	18659332.4375448
AACEQLHQQQQQQQEETTAATLLLQGEEEGEED	P42669	Pura	Pura	IPI00118447;	U02098;AF017631;	ENSMUST00000051301;	Transcriptional activator protein Pur-alpha (Purine-rich single-stranded DNA-binding protein alpha)		NP_033015.1;	Mm.231802;Mm.482241;	mmu:19290;	DNA replication factor A complex; DNA unwinding involved in replication; SMAD binding; apoptotic process; cell differentiation; cell proliferation; cytoplasm; dendrite; double-stranded DNA binding; double-stranded telomeric DNA binding; mitotic cell cycle G1/S transition checkpoint; negative regulation of transcription, DNA-dependent; nervous system development; neuronal cell body; positive regul…	GO:0005662; GO:0006268; GO:0046332; GO:0006915; GO:0030154; GO:0008283; GO:0005737; GO:0030425; GO:0003690; GO:0003691; GO:0031575; GO:0045892; GO:0007399; GO:0043025; GO:0008284; GO:0032422; GO:0003700; GO:0003697; GO:0006351; GO:0000900		PUR DNA-binding protein family	Nucleus.	-0.0346666324774166	0.1466176990375	-0.236442344307627	0.813332634709419	199	-0.84617993894003	-0.880846571417453	1.06234615720592	1.63202830974484	1.92870125447456	1.56578416292206	1.77759012037977	13641276.9129741	5.68754928238117	751355.754295085	0.664457197087643	2398445.4878012	1130781.27167307	0.22327305090851	0.140165491427091	1.59292453966566	0.112619394734585	219	-0.84617993894003	-0.622906888031523	1.0628574630459	1.63202830974484	1.92870125447456	1.2498261682905	2.00644139967713	13641276.9129741	5.68754928238117	1540344.48866669
AACNGPYDGK	Q9CPV4	Glod4	Glod4	IPI00110721;IPI00112630;IPI00831130;	AK006979;AK010992;AK012569;AK013212;AK138073;AL591129;BC061012;	ENSMUST00000017430;ENSMUST00000170710;	Glyoxalase domain-containing protein 4		NP_080305.2;	Mm.482113;	mmu:67201;	mitochondrion	GO:0005739		Glyoxalase I family	Mitochondrion.	-0.00121059032988485	0.0960905255971751	-0.0125984359265535	0.989953642327825	459	0.147502454675512	0.146291864345625	1.05590327917718	2.43203383284686	16.4880905758284	2.35249877984564	16.080858565639	8130661.43738035	1.92769922461469	8227311.68601236	1.90656074320565	4217806.04233293	4315263.34281863	0.15940006743731	0.0870469064630169	1.83119738442438	0.0676600708293156	505	0.147502454675512	0.306902522112826	1.00103942432469	2.43203383284686	16.4880905758284	2.4250047343778	7.90154710258883	8130661.43738035	1.92769922461469	7580272.80959561
AADAEAEVASLNRR	P21107	Tpm3 Tpm-5 Tpm5	Tpm3	IPI00230044;IPI00278611;	X53753;U04541;AF317223;AK088111;AK088902;X72633;	ENSMUST00000029549;ENSMUST00000121503;	Tropomyosin alpha-3 chain (Gamma-tropomyosin) (Tropomyosin-3)	I48852;S11390;	NP_001240667.1;	Mm.240839;Mm.421791;	mmu:59069;	cortical cytoskeleton; growth cone; podosome; stress fiber	GO:0030863; GO:0030426; GO:0002102; GO:0001725		Tropomyosin family	Cytoplasm › cytoskeleton.	0.0625817750006336	0.112563304547879	0.555969596415096	0.579013157262927	159	2.25320930235276	2.31579107735339	0.729493588930716	3.27046762512508	1.45147085169146	3.48912489456396	1.50666652475038	132636596.157184	2.3237463276488	160942494.747502	2.23671781022925	57078776.0174268	71954760.6816822	0.156173276361318	0.129289772412526	1.20793217782931	0.228703219840791	175	2.25320930235276	2.40938257871407	0.876885899944914	3.27046762512508	1.45147085169146	3.49258843904583	1.44957819065409	132636596.157184	2.3237463276488	149921026.156827
AADAHVDAHYYEQNEQPTGTCAACITGGNR	P55264	Adk	Adk	IPI00126940;IPI00138084;	AY540996;AY540997;BC009659;U26589;	ENSMUST00000045376;	Adenosine kinase (AK) (EC 2.7.1.20) (Adenosine 5'-phosphotransferase)		NP_001229970.1;NP_598840.1;	Mm.188734;	mmu:11534;	AMP salvage; ATP binding; adenosine kinase activity; adenosine metabolic process; cytosol; dATP biosynthetic process; metal ion binding; nucleus; phosphotransferase activity, alcohol group as acceptor; positive regulation of T cell proliferation; purine ribonucleoside salvage	GO:0044209; GO:0005524; GO:0004001; GO:0046085; GO:0005829; GO:0006175; GO:0046872; GO:0005634; GO:0016773; GO:0042102; GO:0006166	Purine metabolism; AMP biosynthesis via salvage pathway; AMP from adenosine: step 1/1.	Carbohydrate kinase PfkB family		0.000766662347765152	0.0794316155593599	0.00965185389175698	0.992307840897479	219	0.679931695534811	0.680698357882577	0.60362801834728	1.74305508487313	2.5635738064867	1.80400713092121	2.65022988527968	4738694.70758806	1.15934561940173	4270928.9772074	0.991862629170175	4087387.4263944	4305968.23753769	-0.237193051896742	0.0917928094811829	-2.58400470840111	0.010355832709142	241	0.679931695534811	0.442738643638071	0.730027007673266	1.74305508487313	2.5635738064867	2.00073500378084	4.51899790662139	4738694.70758806	1.15934561940173	4160796.32366342
AADAVEDLR	Q9WVE8	Pacsin2	Pacsin2	IPI00125880;	AF128535;BC023502;	ENSMUST00000056177;ENSMUST00000165095;ENSMUST00000171436;	Protein kinase C and casein kinase substrate in neurons protein 2		NP_001152981.1;NP_001152982.1;NP_035992.1;	Mm.23978;	mmu:23970;	cytoplasmic membrane-bounded vesicle; cytoskeletal protein binding; cytosol; endocytosis; negative regulation of endocytosis; signal transduction	GO:0016023; GO:0008092; GO:0005829; GO:0006897; GO:0045806; GO:0007165		PACSIN family	Cytoplasmic vesicle.	-0.0842691818864537	0.178344006284352	-0.472509189639348	0.637603365948876	99	-0.858014723426125	-0.942283905312579	0.91374112589987	2.33087350034873	2.71658916415951	2.09212351631833	2.22026875819801	4113306.23827366	2.07672469493058	1569066.94355732	1.01733068210145	1980669.96955086	1542337.18805785	0.159136670289446	0.170712381734459	0.932191728992341	0.353297684303525	109	-0.858014723426125	-0.69887805313668	0.915343171562849	2.33087350034873	2.71658916415951	2.04382615892917	2.92443889138618	4113306.23827366	2.07672469493058	1993590.16674769
AADEEAFEDNSEEYIRR	Q9ERK4	Cse1l Xpo2	Cse1l	IPI00112414;	AF301152;	ENSMUST00000002790;	Exportin-2 (Exp2) (Chromosome segregation 1-like protein) (Importin-alpha re-exporter)		NP_076054.1;	Mm.22417;	mmu:110750;	cytoplasm; intracellular protein transport; nuclear pore; protein transporter activity	GO:0005737; GO:0006886; GO:0005643; GO:0008565		XPO2/CSE1 family	Cytoplasm. Nucleus.	-0.191145822347599	0.210721783948215	-0.907100437202889	0.368043721454443	59	-0.203940494773295	-0.395086317120893	0.836276154226291	2.51649763789311	12.3393720344285	2.79522405782789	7.07497054870816	8452448.41274104	1.69775433760213	8933517.44025924	1.73060084689906	4978605.1053058	5162090.06615626	0.186630372960503	0.22350407289894	0.835020008986101	0.406765154658902	65	-0.203940494773295	-0.0173101218127915	0.928282132700858	2.51649763789311	12.3393720344285	2.58904432479815	149.568232551948	8452448.41274104	1.69775433760213	9575259.06655835
AADFQLHTHVNDGTEFGGSIYQK	Q60931	Vdac3	Vdac3	IPI00122548;	U30839;AK083785;BC004743;	ENSMUST00000009036;	Voltage-dependent anion-selective channel protein 3 (VDAC-3) (mVDAC3) (Outer mitochondrial membrane protein porin 3)		NP_035826.1;	Mm.227704;	mmu:22335;	behavioral fear response; learning; mitochondrial inner membrane; mitochondrial outer membrane; neuron-neuron synaptic transmission; nucleotide binding; pore complex; porin activity; voltage-gated anion channel activity	GO:0001662; GO:0007612; GO:0005743; GO:0005741; GO:0007270; GO:0000166; GO:0046930; GO:0015288; GO:0008308		Eukaryotic mitochondrial porin family	Mitochondrion outer membrane.	-0.0113683139858853	0.113136017747229	-0.100483596755939	0.920027747586988	299	0.693679186684593	0.68231087269871	1.00398256100218	2.28246336605579	3.29037314347677	2.08448776003374	3.05504110141038	10648497.3518843	1.68282692184769	6968170.02143434	1.30496352041408	6327743.63996543	5339743.15176509	-0.0224999614567104	0.0999525470769101	-0.225106434150172	0.822036229709481	329	0.693679186684593	0.671179225227879	0.928268081586734	2.28246336605579	3.29037314347677	2.07192565814125	3.08699313128739	10648497.3518843	1.68282692184769	6896387.84605068
AADGNYYNAR	Q8BH86		NA	IPI00308195;IPI00416621;	AK033551;AK038436;AK081256;BC021385;BC066161;	ENSMUST00000069782;ENSMUST00000110069;ENSMUST00000110070;ENSMUST00000167322;	UPF0317 protein C14orf159 homolog, mitochondrial		NP_663423.2;	Mm.218590;	mmu:217830;	mitochondrion	GO:0005739		UPF0317 family	Mitochondrion.	-0.041114050323353	0.069241820215561	-0.593774834274407	0.552943016168174	479	-0.413274041362082	-0.454388091685435	0.777237504249681	1.3183257903617	3.18995547365307	1.35284468652825	2.97728904274366	3386395.92328826	1.9188473857524	3005786.79716354	1.65349456599142	1764807.32570632	1817838.93275832	-0.00362890684817505	0.0619619601288457	-0.0585666889915843	0.953319443757473	527	-0.413274041362082	-0.416902948210258	0.727888220412445	1.3183257903617	3.18995547365307	1.15050650062488	2.75965067065115	3386395.92328826	1.9188473857524	1595165.74443507
AADHYSEQMAQR	Q61107	Gbp4 Gbp3	Gbp4	IPI00117730;	U44731;BC019195;	ENSMUST00000029935;ENSMUST00000106221;ENSMUST00000106222;	Guanylate-binding protein 4 (GTP-binding protein 3) (GBP-3) (GTP-binding protein 4) (GBP-4) (Guanine nucleotide-binding protein 4) (Guanylate-binding protein 3)		NP_061204.3;	Mm.439718;	mmu:55932;	GTP binding; GTPase activity; adhesion to symbiont; cellular response to interferon-beta; cellular response to interferon-gamma; cytoplasmic vesicle; cytosol; defense response to Gram-positive bacterium; defense response to protozoan; nucleus; symbiont-containing vacuole membrane	GO:0005525; GO:0003924; GO:0051856; GO:0035458; GO:0071346; GO:0031410; GO:0005829; GO:0050830; GO:0042832; GO:0005634; GO:0020005		GBP family	Cytoplasm. Nucleus.	-0.229480218826271	0.27142090218672	-0.845477326828736	0.408366029575195	19	-0.0604980594405894	-0.289978278266861	0.621903414731924	0.528447149732828	8.73494380843367	0.715227658180827	2.46648701570198	1840750.21672983	1.12481909065108	727590.447017797	0.523678591806297	1636485.57535092	1389383.59979192	-0.626227569136644	0.253290491187706	-2.47236904236001	0.0220537924138387	21	-0.0604980594405894	-0.686725628577234	0.607369261096682	0.528447149732828	8.73494380843367	0.688312770972347	1.00231117396682	1840750.21672983	1.12481909065108	400235.895237477
AADKDTCFSTEGPNLVTR	P07724	Alb Alb-1 Alb1	Alb	IPI00131695;	AJ011413;AJ277794;AK010025;AK050248;AK050644;AK160487;BC024643;BC049971;M16111;X13060;	ENSMUST00000031314;	Serum albumin	A05139;	NP_033784.2;	Mm.16773;	mmu:11657;	DNA binding; basement membrane; cell surface binding; cellular response to starvation; cytoplasm; drug binding; extracellular space; fatty acid binding; hemolysis by symbiont of host erythrocytes; maintenance of mitochondrion location; metal ion binding; negative regulation of apoptotic process; oxygen binding; positive regulation of circadian sleep/wake cycle, non-REM sleep; protein complex; pyr…	GO:0003677; GO:0005604; GO:0043498; GO:0009267; GO:0005737; GO:0008144; GO:0005615; GO:0005504; GO:0019836; GO:0051659; GO:0046872; GO:0043066; GO:0019825; GO:0046010; GO:0043234; GO:0030170; GO:0046689; GO:0007584; GO:0010033; GO:0070541; GO:0015643; GO:0006810; GO:0008270		ALB/AFP/VDB family	Secreted.	-0.038598790007932	0.038399341007187	-1.00519407353131	0.314881383558065	3119	2.19583698345308	2.15723819344516	1.09891910085999	4.11124765900177	1.87229183677224	4.1154321312266	1.90773190634742	206935601.584637	2.29696982270858	200296609.264637	2.21117987444162	90090692.3281296	90583589.1416193	-0.0428963243003883	0.036509476263304	-1.17493672029209	0.240101567035996	3431	2.19583698345308	2.15294065915268	1.0934572903171	4.11124765900177	1.87229183677224	4.20320829906667	1.95231033479618	206935601.584637	2.29696982270858	191912924.184999
AADLLIFGK	Q8CFD4	Snx8	Snx8	IPI00319079;	BC037599;AK045061;AK082871;AK148429;	ENSMUST00000031539;	Sorting nexin-8		NP_758481.1;	Mm.27098;	mmu:231834;	cell communication; early endosome membrane; early endosome to Golgi transport; intracellular protein transport; phosphatidylinositol binding; retromer complex	GO:0007154; GO:0031901; GO:0034498; GO:0006886; GO:0035091; GO:0030904		Sorting nexin family	Early endosome membrane; Peripheral membrane protein; Cytoplasmic side.	-0.516046420647561	0.334026745190284	-1.54492545306091	0.127711640206377	59	-0.489380228746607	-1.00542664939417	1.32562754852675	2.3930273835369	4.88991430991376	3.10391912728185	3.08716615891587	1919482.66054134	0.911959238912056	1838501.56991236	0.914213023693631	2104789.9715685	2011020.97898846	0.0559532779080922	0.292101996664967	0.191553904276351	0.848688779240312	65	-0.489380228746607	-0.433426950838515	1.21319070795162	2.3930273835369	4.88991430991376	2.3492045453645	5.42007030439545	1919482.66054134	0.911959238912056	1491304.33133804
AADLQIQMTK	O35855	Bcat2 Bcatm Eca40	Bcat2	IPI00122442;	BC017688;BC048072;U68526;	ENSMUST00000033098;	Branched-chain-amino-acid aminotransferase, mitochondrial (BCAT(m)) (EC 2.6.1.42)		NP_033867.1;	Mm.24210;	mmu:12036;	L-isoleucine transaminase activity; L-leucine transaminase activity; L-valine transaminase activity; branched-chain-amino-acid transaminase activity; isoleucine catabolic process; lactation; leucine biosynthetic process; leucine metabolic process; mitochondrion; nucleus; regulation of hormone levels; valine metabolic process	GO:0052656; GO:0052654; GO:0052655; GO:0004084; GO:0006550; GO:0007595; GO:0009098; GO:0006551; GO:0005739; GO:0005634; GO:0010817; GO:0006573		Class-IV pyridoxal-phosphate-dependent aminotransferase family	Mitochondrion.	0.101685601341865	0.0995068532722472	1.02189545742801	0.307863632459479	239	0.66466736488038	0.766352966222245	0.789811162514879	1.77216216962646	2.66623917957127	1.62781659671252	2.12410817007322	4197429.76324899	1.05689933327395	3746026.86629999	0.924783102506334	3971456.53431973	4050708.59983013	-0.0751302044185724	0.0932096300635224	-0.806034788115467	0.420950992823041	263	0.66466736488038	0.589537160461809	0.774257337339421	1.77216216962646	2.66623917957127	1.7922516129206	3.04009947653962	4197429.76324899	1.05689933327395	4250700.3554375
AADMLSGPR	Q8CHT0	Aldh4a1	Aldh4a1	IPI00405699;	AK044712;AL831790;CH466615;BC024133;BC026589;BC039281;BC056226;	ENSMUST00000039818;	Delta-1-pyrroline-5-carboxylate dehydrogenase, mitochondrial (P5C dehydrogenase) (EC 1.5.1.12) (Aldehyde dehydrogenase family 4 member A1)		NP_780647.3;	Mm.273571;	mmu:212647;	1-pyrroline-5-carboxylate dehydrogenase activity; mitochondrial matrix; mitochondrion; oxidoreductase activity, acting on the aldehyde or oxo group of donors, NAD or NADP as acceptor; proline biosynthetic process; proline catabolic process to glutamate	GO:0003842; GO:0005759; GO:0005739; GO:0016620; GO:0006561; GO:0010133	Amino-acid degradation; L-proline degradation into L-glutamate; L-glutamate from L-proline: step 2/2.	Aldehyde dehydrogenase family	Mitochondrion matrix.	0.0990473952164613	0.0761816013217816	1.30014850696164	0.194127157374173	519	0.104812844909528	0.203860240125991	0.890054136478953	2.94210485707548	28.0700791932043	2.98593899258595	14.6469904614091	6880524.93518961	1.30944703025038	7540815.81329218	1.26377968555389	5254527.12193634	5966875.31813521	0.192336822153713	0.0672571698482999	2.85972220638385	0.00439513157910199	571	0.104812844909528	0.29714966706324	0.822354711151129	2.94210485707548	28.0700791932043	2.8367946911335	9.54668641957377	6880524.93518961	1.30944703025038	6164410.01447566
AADPAMELR	Q62141	Sin3b Kiaa0700	Sin3b	IPI00121971;IPI00124066;IPI00338793;IPI00608092;	L38622;AF038848;AK173005;BC020049;BC021160;	ENSMUST00000004494;ENSMUST00000109950;	Paired amphipathic helix protein Sin3b (Histone deacetylase complex subunit Sin3b) (Transcriptional corepressor Sin3b)	I61714;	NP_001106719.1;NP_033214.2;	Mm.2137;	mmu:20467;	X chromosome; XY body; Y chromosome; autosome; cardiac muscle tissue development; chromatin binding; cytoplasm; negative regulation of cell cycle; negative regulation of transcription, DNA-dependent; nucleus; skeletal muscle tissue development; transcription corepressor activity; transcription, DNA-dependent	GO:0000805; GO:0001741; GO:0000806; GO:0030849; GO:0048738; GO:0003682; GO:0005737; GO:0045786; GO:0045892; GO:0005634; GO:0007519; GO:0003714; GO:0006351			Nucleus.	0.607264637328298	0.226702947646003	2.67867993616273	0.0148563648894059	19	-3.19510426545567	-2.58783962812738	0.51944170892871	0.578902187375982	0.181184130244157	0.34109468018663	0.131806730401394	144546.674119501	0.810022073137893	95659.0493348034	0.380707170116977	178447.821254488	251266.739487493	-0.258675225493135	0.524306094147204	-0.493366810686945	0.626873471535895	21	-3.19510426545567	-3.45377949094881	1.25724184708806	0.578902187375982	0.181184130244157	1.78286696656779	0.516207526056624	144546.674119501	0.810022073137893	161646.933788618
AADPPAENSSAPEAEQGGAE	P62960	Ybx1 Msy-1 Msy1 Nsep1 Yb1	Ybx1	IPI00120886;	M60419;M62867;X57621;BC013450;BC013620;BC029747;BC031472;BC061634;	ENSMUST00000079644;	Nuclease-sensitive element-binding protein 1 (CCAAT-binding transcription factor I subunit A) (CBF-A) (DNA-binding protein B) (DBPB) (Enhancer factor I subunit A) (EFI-A) (Y-box transcription factor) (Y-box-binding protein 1) (YB-1)	I58195;	NP_035862.2;	Mm.258204;	mmu:22608;	CRD-mediated mRNA stability complex; CRD-mediated mRNA stabilization; RNA binding; RNA splicing; U12-type spliceosomal complex; cytoplasmic stress granule; extracellular region; histone pre-mRNA 3'end processing complex; in utero embryonic development; mRNA processing; negative regulation of striated muscle cell differentiation; negative regulation of transcription from RNA polymerase II promoter…	GO:0070937; GO:0070934; GO:0003723; GO:0008380; GO:0005689; GO:0010494; GO:0005576; GO:0071204; GO:0001701; GO:0006397; GO:0051154; GO:0000122; GO:0051781; GO:0003697; GO:0006351			Cytoplasm. Nucleus. Cytoplasmic granule. Secreted.	-0.312939633500403	0.186648280838543	-1.67662746259692	0.0958629850780157	139	-2.01296888222235	-2.32590851572276	1.13149506945209	1.89018849744428	0.939005323995612	2.19672842679635	0.944460374063223	471788.606328084	0.825838785086607	407610.759053167	0.766229673725304	571284.147521125	531969.42513518	0.446257528907049	0.151207420974238	2.95129383221925	0.00366306102422425	153	-2.01296888222235	-1.5667113533153	0.959303542861508	1.89018849744428	0.939005323995612	1.47104164608855	0.93893597118301	471788.606328084	0.825838785086607	393761.834854715
AADVASFVK	P70236	Map2k6 Prkmk6 Sapkk3	Map2k6	IPI00137439;	X97052;BC075652;	ENSMUST00000020949;	Dual specificity mitogen-activated protein kinase kinase 6 (MAP kinase kinase 6) (MAPKK 6) (EC 2.7.12.2) (MAPK/ERK kinase 6) (MEK 6) (SAPKK3)	S71632;	NP_036073.1;	Mm.14487;	mmu:26399;	ATP binding; MAPK cascade; activation of MAPK activity; apoptotic process; cardiac muscle contraction; cytoskeleton; cytosol; nucleus; positive regulation of apoptotic process; protein serine/threonine kinase activity; protein tyrosine kinase activity; regulation of transcription, DNA-dependent; response to drug; response to stress; transcription, DNA-dependent	GO:0005524; GO:0000165; GO:0000187; GO:0006915; GO:0060048; GO:0005856; GO:0005829; GO:0005634; GO:0043065; GO:0004674; GO:0004713; GO:0006355; GO:0042493; GO:0006950; GO:0006351		Protein kinase superfamily, STE Ser/Thr protein kinase family, MAP kinase kinase subfamily	Nucleus. Cytoplasm. Cytoplasm › cytoskeleton.	0.0387676375526059	0.171754583825488	0.225715300803826	0.823833045375375	19	-2.68632346511031	-2.64755582755771	0.393539190667968	0.42552571132147	0.158404494785588	0.293479082100248	0.110849062764041	96494.6682765744	0.436613745564149	73458.6854489758	0.310303070490823	221006.940933327	236732.061119415	-0.0492412339205534	0.167481825245044	-0.294009417729405	0.771637028256328	21	-2.68632346511031	-2.73556469903087	0.401607308546067	0.42552571132147	0.158404494785588	0.358479299726692	0.131043985124421	96494.6682765744	0.436613745564149	47826.8431124816
AADVHEVR	P52480	Pkm Pk3 Pkm2 Pykm	Pkm	IPI00407130;IPI00845840;	D38379;X97047;AK002341;AK135397;AK151724;AK153483;AK155110;AK155655;AK170892;AK168943;AK171023;AK171033;BC016619;BC094663;	ENSMUST00000034834;ENSMUST00000163694;	Pyruvate kinase isozymes M1/M2 (EC 2.7.1.40) (Pyruvate kinase muscle isozyme)	S55921;	NP_001240812.1;NP_035229.2;	Mm.326167;Mm.488724;	mmu:18746;	ATP binding; flagellum; glycolysis; magnesium ion binding; mitochondrion; nucleus; plasma membrane; potassium ion binding; programmed cell death; pyruvate kinase activity	GO:0005524; GO:0019861; GO:0006096; GO:0000287; GO:0005739; GO:0005634; GO:0005886; GO:0030955; GO:0012501; GO:0004743	Carbohydrate degradation; glycolysis; pyruvate from D-glyceraldehyde 3-phosphate: step 5/5.	Pyruvate kinase family	Cytoplasm. Nucleus.	0.0902331624829779	0.0547774026571445	1.64726982489026	0.0998109061544029	1019	2.10725461317856	2.19748777566155	0.896326373961407	3.06495196390965	1.45447633368163	3.00757305168759	1.36864153921501	34469075.7983179	1.52575258903476	36955023.3186592	1.48198843422064	22591523.7149452	24936107.7760999	0.111169085047004	0.0515328833532962	2.157245584045	0.0311985275949006	1121	2.10725461317856	2.21842369822557	0.882477117584968	3.06495196390965	1.45447633368163	3.12614832048556	1.40917549834418	34469075.7983179	1.52575258903476	38804648.2984518
AAEAEHFFLQR	B1AUH1	Ptpru Pcp2 Ptpf	Ptpru	IPI00121326;IPI00649924;	D88187;U55057;AL670959;AL670959;CH466552;AK052720;BC080736;	ENSMUST00000030741;ENSMUST00000105987;	Receptor-type tyrosine-protein phosphatase U (R-PTP-U) (EC 3.1.3.48) (Ftp-1) (Pancreatic carcinoma phosphatase 2) (PCP-2) (Protein-tyrosine phosphatase-lamda) (PTP-lambda) (PTPlambda) (Receptor-type protein-tyrosine phosphatase psi) (R-PTP-psi)		NP_001076588.1;NP_035344.2;	Mm.4860;	mmu:19273;	canonical Wnt receptor signaling pathway; cell differentiation; cell-cell junction; homotypic cell-cell adhesion; integral to membrane; negative regulation of cell migration; negative regulation of cell proliferation; plasma membrane; protein localization to cell surface; protein tyrosine phosphatase activity	GO:0060070; GO:0030154; GO:0005911; GO:0034109; GO:0016021; GO:0030336; GO:0008285; GO:0005886; GO:0034394; GO:0004725		Protein-tyrosine phosphatase family, Receptor class 2B subfamily	Cell junction. Cell membrane; Single-pass type I membrane protein.	-0.816740497423441	0.581036478595973	-1.40566130959114	0.175966873247426	19	0.725491700013493	-0.0912487974099483	1.33132182234832	1.08194719878124	1.49132953383356	1.59102637230171	17.4361352419122	1537669.64603604	0.579826621714102	1991283.77664082	1.00537519092362	2651947.30364455	1980637.47207792	0.153175307711938	0.520465766592428	0.294304289626581	0.771414819300492	21	0.725491700013493	0.878667007725431	1.24803306511454	1.08194719878124	1.49132953383356	1.41835229342224	1.6142091155714	1537669.64603604	0.579826621714102	3060492.94363298
AAECNIVVTQPR	O70133	Dhx9 Ddx9	Dhx9	IPI00339468;IPI00607914;IPI00875791;	U91922;AF023530;AY512925;BC089159;AK013423;U92080;		ATP-dependent RNA helicase A (RHA) (EC 3.6.4.13) (DEAH box protein 9) (mHEL-5) (Nuclear DNA helicase II) (NDH II)		NP_031868.2;	Mm.20000;	mmu:13211;	ATP binding; ATP-dependent helicase activity; CRD-mediated mRNA stability complex; DNA binding; cellular response to heat; circadian rhythm; double-stranded RNA binding; nucleolus; ribonucleoprotein complex	GO:0005524; GO:0008026; GO:0070937; GO:0003677; GO:0034605; GO:0007623; GO:0003725; GO:0005730; GO:0030529		DEAD box helicase family, DEAH subfamily	Nucleus › nucleolus. Cytoplasm.	0.189398214124946	0.107102844752559	1.76837706377002	0.0789155460389311	159	-1.81874410682012	-1.62934589269518	0.694105764903169	1.1079034740176	0.609158523105624	1.04694247533732	0.642553849388927	401595.494734253	0.782849070628937	380337.686393419	0.637386678215252	512992.235414693	596714.207235086	0.0345452218915508	0.0975804010300896	0.354018035659625	0.723751541051103	175	-1.81874410682012	-1.78419888492857	0.661822479671764	1.1079034740176	0.609158523105624	0.988466951978176	0.554011640926313	401595.494734253	0.782849070628937	291567.099471241
AAEDYGVIK	P37804	Tagln Sm22 Sm22a	Tagln	IPI00226515;	L41170;L41169;L41154;Z68618;U36588;AK002880;AK077235;BC003795;	ENSMUST00000034590;	Transgelin (Actin-associated protein p27) (Smooth muscle protein 22-alpha) (SM22-alpha)	A57015;A60598;	NP_035656.1;	Mm.283283;	mmu:21345;	cytoplasm; muscle organ development	GO:0005737; GO:0007517		Calponin family	Cytoplasm.	0.345463868722397	0.10319213420909	3.34777327138532	0.000993016760358254	179	0.114603841065207	0.460067709787604	0.709328649205793	1.58466170002823	13.8273000738832	1.43042221881274	3.10915586636825	3833126.17916296	1.45063962146768	3171305.17115143	1.02462609757764	2642369.69846777	3095085.29857753	0.161820475245481	0.100267643789164	1.61388528871533	0.108152928631599	197	0.114603841065207	0.276424316310688	0.721300090278548	1.58466170002823	13.8273000738832	1.67836352838837	6.07169279023185	3833126.17916296	1.45063962146768	3307665.89110516
AAEEAFVNDIDESSPGTEWER	O08585	Clta	Clta	IPI00114409;IPI00876257;	U91848;		Clathrin light chain A (Lca)			Mm.298875;		clathrin coat of coated pit; clathrin coat of trans-Golgi network vesicle; cytoplasmic membrane-bounded vesicle; intracellular protein transport; structural molecule activity; vesicle-mediated transport	GO:0030132; GO:0030130; GO:0016023; GO:0006886; GO:0005198; GO:0016192		Clathrin light chain family	Cytoplasmic vesicle membrane; Peripheral membrane protein; Cytoplasmic side. Membrane › coated pit; Peripheral membrane protein; Cytoplasmic side.	-0.163782715470276	0.305059548367762	-0.536887687491194	0.59336413558939	59	-1.17336023231331	-1.33714294778359	1.21066755007017	2.12462650744128	1.81071971669989	2.47452472407372	1.85060597161689	1817884.72232545	1.32556533911632	2705998.66424991	1.63354709429954	1371403.33160591	1656517.08095397	-0.231945725096452	0.379901867154924	-0.610541155887145	0.543632348651797	65	-1.17336023231331	-1.40530595740977	1.57785095763811	2.12462650744128	1.81071971669989	3.19416044667339	2.27292884501878	1817884.72232545	1.32556533911632	2395643.8278567
AAEGIQEVSTACTWNGRPCSLSVHIDK	Q61234	Snta1 Snt1	Snta1	IPI00267848;	U00677;BC018546;	ENSMUST00000028991;	Alpha-1-syntrophin (59 kDa dystrophin-associated protein A1 acidic component 1) (Syntrophin-1)	I84771;		Mm.1541;		cell junction; cytoplasm; cytoskeleton; neuromuscular junction development; phospholipid binding; postsynaptic membrane; protein complex; regulation of vasoconstriction by circulating norepinephrine; sarcolemma	GO:0030054; GO:0005737; GO:0005856; GO:0007528; GO:0005543; GO:0045211; GO:0043234; GO:0003117; GO:0042383		Syntrophin family	Cell membrane › sarcolemma; Peripheral membrane protein; Cytoplasmic side. Cell junction. Cytoplasm › cytoskeleton.	-0.10341004703027	0.114152379823578	-0.905894797726417	0.36598711855787	219	-0.0780762041199577	-0.181486251150227	0.8674829831585	2.11314918091977	27.0652141038144	1.60382512123654	8.8371714720635	14904698.6648579	2.87738597049406	3819851.40482854	1.49981434262286	5179944.16379901	2546882.83494372	-0.0738272511390465	0.106883575440739	-0.690725874715704	0.490402545791587	241	-0.0780762041199577	-0.151903455259003	0.850043671061381	2.11314918091977	27.0652141038144	1.79693041040208	11.8294242045925	14904698.6648579	2.87738597049406	10274383.6061318
AAEIQPLAQSHATK	P04247	Mb	Mb	IPI00230760;	BC025172;X04405;X04417;	ENSMUST00000019037;ENSMUST00000166179;ENSMUST00000169226;	Myoglobin	MYMS;	NP_001157519.1;NP_001157520.1;NP_038621.2;	Mm.404074;	mmu:17189;	brown fat cell differentiation; enucleate erythrocyte differentiation; heart development; heme binding; iron ion binding; oxygen binding; oxygen transporter activity; response to hormone stimulus; response to hydrogen peroxide; response to hypoxia; slow-twitch skeletal muscle fiber contraction	GO:0050873; GO:0043353; GO:0007507; GO:0020037; GO:0005506; GO:0019825; GO:0005344; GO:0009725; GO:0042542; GO:0001666; GO:0031444		Globin family		-0.217062555768321	0.0636403312450235	-3.41077036404166	0.000674823880045096	959	1.6683370534834	1.45127449771508	1.01025893896863	3.61209997083913	2.16509005976775	3.64869149487334	2.51412913312948	282056667.992732	3.43398357596164	278873489.178805	3.50672277258317	82136871.5817886	79525388.0230108	-0.156905703592491	0.0576978628288881	-2.71943701030693	0.0066466835029735	1055	1.6683370534834	1.51143134989091	0.958548888427631	3.61209997083913	2.16509005976775	3.64180463124903	2.40950714136761	282056667.992732	3.43398357596164	293431566.508211
AAEITASVDRLQQDFK	Q9D1D1	Tspan11	Tspan11	IPI00133611;	AK003691;AK028808;AK053788;AK090022;BC057639;	ENSMUST00000032501;	Tetraspanin-11 (Tspan-11)		NP_081019.1;	Mm.174368;	mmu:68498;	integral to membrane	GO:0016021		Tetraspanin (TM4SF) family	Membrane; Multi-pass membrane protein.	0.410921466318905	0.331752715602896	1.23863783774049	0.23056491657032	19	3.33005906284021	3.74098052915911	0.760140965628714	0.488033654562038	0.146554053652668	1.03495941681285	0.276654585274059	7490502.28514142	0.512150406486852	22506162.0901225	0.896633219058436	14625590.8230617	25100745.3345933	-0.000224015446932633	0.272646558513186	-0.000821633136153446	0.999352186890413	21	3.33005906284021	3.32983504739328	0.653783480020133	0.488033654562038	0.146554053652668	0.814129060080223	0.244495312378178	7490502.28514142	0.512150406486852	16139839.4266194
AAELIANSLATAGDGLIELR	P67778	Phb	Phb	IPI00133440;	X78682;AK002714;AK010619;AK150956;AK151073;AK168248;AK168656;AL732490;BC083354;BC089034;	ENSMUST00000125172;	Prohibitin (B-cell receptor-associated protein 32) (BAP 32)		NP_032857.1;	Mm.263862;	mmu:18673;	DNA biosynthetic process; DNA replication; cellular response to interleukin-6; histone deacetylation; integral to plasma membrane; mitochondrial inner membrane; negative regulation of androgen receptor signaling pathway; negative regulation of cell growth; negative regulation of cell proliferation; negative regulation of glucocorticoid receptor signaling pathway; negative regulation of transcript…	GO:0071897; GO:0006260; GO:0071354; GO:0016575; GO:0005887; GO:0005743; GO:0060766; GO:0030308; GO:0008285; GO:2000323; GO:0010944; GO:0000122; GO:0005654; GO:0005634; GO:0045893; GO:0050847; GO:0000981; GO:0044212		Prohibitin family	Mitochondrion inner membrane.	-0.391746117546378	0.0945006889328436	-4.14543133992145	4.23576869381516e-05	359	0.0943622697520463	-0.297383847794333	0.918651691191991	1.90838140621301	20.223987948018	2.08557609149562	7.01307790239496	2800265.06969413	1.04114094442465	2383305.68663028	1.01430280921939	2689611.89615071	2349698.39871042	-0.0450802848601739	0.0818780043884686	-0.550578695668881	0.582233751406139	395	0.0943622697520463	0.0492819848918741	0.832985466183559	1.90838140621301	20.223987948018	1.87025253514774	37.9500245221681	2800265.06969413	1.04114094442465	2745220.08905616
AAELLGVER	Q6XPS7	Tha1 Gly1 RP23-268N22.3-001	Tha1	IPI00119576;	AY219871;AL591433;	ENSMUST00000033230;	0		NP_082195.2;	Mm.3200;	mmu:71776;	cellular amino acid metabolic process; lyase activity; pyridoxal phosphate binding	GO:0006520; GO:0016829; GO:0030170				-0.107335693688765	0.179424702388789	-0.598221383453563	0.551981871457499	59	-1.13992344601782	-1.24725913970659	0.712069712373769	2.9218068206412	2.56316056209577	3.24762143085729	2.60380648052118	4291102.54833815	1.39709347602406	5959361.48571213	1.53267376812463	3071449.85069293	3888212.61879101	0.440589257245615	0.151510727316746	2.90797400981732	0.00497242382769766	65	-1.13992344601782	-0.69933418877221	0.629271311508676	2.9218068206412	2.56316056209577	2.59356186647144	3.70861586364716	4291102.54833815	1.39709347602406	4654528.67683011
AAEMLLFGK	Q9WUR2	Eci2 Peci	Eci2	IPI00322931;IPI00877214;	AF153613;AK009478;BC001983;	ENSMUST00000021854;ENSMUST00000171229;ENSMUST00000178421;	Enoyl-CoA delta isomerase 2, mitochondrial (EC 5.3.3.8) (Delta(3),delta(2)-enoyl-CoA isomerase) (D3,D2-enoyl-CoA isomerase) (Dodecenoyl-CoA isomerase) (Peroxisomal 3,2-trans-enoyl-CoA isomerase) (pECI)		NP_001103801.1;NP_001103802.1;NP_035998.2;	Mm.28883;	mmu:23986;	dodecenoyl-CoA delta-isomerase activity; fatty acid beta-oxidation; fatty acid catabolic process; fatty-acyl-CoA binding; mitochondrion; peroxisomal matrix; peroxisome	GO:0004165; GO:0006635; GO:0009062; GO:0000062; GO:0005739; GO:0005782; GO:0005777		Enoyl-CoA hydratase/isomerase family	Mitochondrion. Peroxisome matrix.	0.179004950757924	0.178513537460062	1.00275280690111	0.317086802620122	219	-0.118570652793575	0.0604342979643481	1.35658543649605	2.45662308060172	20.7186434646571	2.06681371112903	34.1993500503357	7545937.44434384	1.95324152634426	5854504.25455215	1.63158824143004	3863289.48190397	3588224.10329512	0.448034213502968	0.157948582426708	2.83658268165128	0.00494774196224086	241	-0.118570652793575	0.329463560709395	1.25616300064158	2.45662308060172	20.7186434646571	1.9043792505342	5.78024242327049	7545937.44434384	1.95324152634426	3883489.74756184
AAENSLVAYK	P62259	Ywhae	Ywhae	IPI00118384;	Z19599;D87663;AF483478;AF483479;BC058686;	ENSMUST00000067664;	14-3-3 protein epsilon (14-3-3E)	S31975;	NP_033562.3;	Mm.234700;	mmu:22627;	axon part; cerebral cortex development; hippocampus development; kinesin complex; melanosome; mitochondrion; negative regulation of protein dephosphorylation; neuron migration; protein domain specific binding; protein targeting	GO:0033267; GO:0021987; GO:0021766; GO:0005871; GO:0042470; GO:0005739; GO:0035308; GO:0001764; GO:0019904; GO:0006605		14-3-3 family	Cytoplasm. Melanosome.	0.0213254237028139	0.0740649675230789	0.287928617482602	0.773525916744798	479	1.01426653448779	1.0355919581906	0.8313771985017	1.89884579018318	1.87213688475102	1.7598625118066	1.69937831004544	16527801.0673875	2.38771064069657	8247736.8199816	1.3778241335617	6922028.48439198	5986059.19222872	0.0760079841339911	0.0784177810809547	0.969269763646132	0.332855234527493	527	1.01426653448779	1.09027451862178	0.921200346164261	1.89884579018318	1.87213688475102	1.88933129701558	1.73289503216483	16527801.0673875	2.38771064069657	7746476.46549945
AAESSAMAATEK	Q9Z1P6	Ndufa7	Ndufa7	IPI00130322;	AF110520;AF528162;AK002476;AK003468;AK010299;BC052817;BC055698;	ENSMUST00000048249;	NADH dehydrogenase [ubiquinone] 1 alpha subcomplex subunit 7 (Complex I-B14.5a) (CI-B14.5a) (NADH-ubiquinone oxidoreductase subunit B14.5a)		NP_075691.1;	Mm.29513;	mmu:66416;	ATP synthesis coupled electron transport; NADH dehydrogenase (ubiquinone) activity; mitochondrial respiratory chain complex I; mitochondrion	GO:0042773; GO:0008137; GO:0005747; GO:0005739		Complex I NDUFA7 subunit family	Mitochondrion inner membrane; Peripheral membrane protein; Matrix side.	-0.17945089983723	0.128958369384761	-1.3915413221597	0.166005107316251	159	0.866381973803104	0.686931073965874	0.835745752872135	1.62834166942207	1.87947316386817	1.86720890350801	2.71818960340229	3820587.3420132	0.953478293050324	3932961.5254707	0.947727853888831	4006999.81306396	4149884.91615235	-0.206535042215146	0.143080207418038	-1.4434913531521	0.150669828705295	175	0.866381973803104	0.659846931587957	0.970417180763139	1.62834166942207	1.87947316386817	2.01925953398803	3.06019386818785	3820587.3420132	0.953478293050324	4729390.21711869
AAETGSSSPTLR	D3Z7W0	Iscu mCG_3543	Iscu	IPI00856218;	CH466529;	ENSMUST00000112311;ENSMUST00000112312;	0					iron ion binding; iron-sulfur cluster assembly; iron-sulfur cluster binding; mitochondrion	GO:0005506; GO:0016226; GO:0051536; GO:0005739				0.374304684929154	0.267976086859944	1.39678390454586	0.178581618782503	19	1.91357345923074	2.28787814415989	0.614010351236878	0.699111453506787	0.365343410327102	0.356973084481516	0.156028014600662	5026420.72134726	0.813195516941248	2225709.76254062	0.308533039571577	6181072.83750607	7213845.77039525	-0.247548905508884	0.26038905123648	-0.950688611266015	0.35257670773372	21	1.91357345923074	1.66602455372185	0.624391010122701	0.699111453506787	0.365343410327102	0.49247392245309	0.295598237944883	5026420.72134726	0.813195516941248	3063632.38212686
AAEVESVKEQLPAK	P27546	Map4 Mtap4	Map4	IPI00406741;IPI00408119;IPI00473748;IPI00848818;	M72414;AK134996;AK138416;AK146790;BC042645;BC044654;BC050893;BC055332;BC055364;	ENSMUST00000035055;ENSMUST00000165876;	Microtubule-associated protein 4 (MAP-4)	B41206;	NP_001192259.1;NP_001192261.1;NP_032659.2;	Mm.217318;Mm.443428;Mm.484451;	mmu:17758;	cell division; cytoplasm; establishment of spindle orientation; microtubule; microtubule binding; microtubule sliding; mitotic spindle; mitotic spindle organization	GO:0051301; GO:0005737; GO:0051294; GO:0005874; GO:0008017; GO:0051012; GO:0072686; GO:0007052			Cytoplasm › cytoskeleton.	-0.00485380724655609	0.155122962050231	-0.0312900629436431	0.975066712552558	219	-0.651321182710901	-0.656174989957456	1.1788324525839	2.15027364578546	3.3014029066822	2.68675966156477	4.09457797490722	3077697.87495	1.47522738949456	3656245.87051785	1.45171166577859	2086253.20873718	2518575.80035145	0.0401987255484547	0.122195646218601	0.328970194867185	0.742463909479388	241	-0.651321182710901	-0.611122457162445	0.971820368761598	2.15027364578546	3.3014029066822	2.20105615579115	3.60166138552831	3077697.87495	1.47522738949456	2873530.83281277
AAFDIFVLGAEDGCISTK	P19123	Tnnc1 Tncc	Tnnc1	IPI00113712;	J04971;M29793;BC061172;	ENSMUST00000169169;	Troponin C, slow skeletal and cardiac muscles (TN-C)	A32620;	NP_033419.1;	Mm.439921;	mmu:21924;	actin filament binding; calcium ion binding; cardiac muscle contraction; regulation of ATPase activity; regulation of muscle filament sliding speed; troponin complex; ventricular cardiac muscle tissue morphogenesis	GO:0051015; GO:0005509; GO:0060048; GO:0043462; GO:0032972; GO:0005861; GO:0055010		Troponin C family		0.206818473319563	0.139397081934618	1.48366429518638	0.138729119408428	379	1.39090459484595	1.59772306816551	1.39222726541887	3.81796623428272	2.74495191721297	3.65421797521575	2.28714102464045	56958397.2658906	2.15734608666615	58499860.2666058	1.95681608496682	26402067.6227759	29895431.0096024	0.439711306847828	0.135257194114755	3.2509273146297	0.00124365085211322	417	1.39090459484595	1.83061590169377	1.41374504779248	3.81796623428272	2.74495191721297	3.95800752233655	2.16211796186978	56958397.2658906	2.15734608666615	84118195.260554
AAFFVTLDEDSHCYNPDDETSLSLYGK	Q924X2	Cpt1b	Cpt1b	IPI00136563;	AJ278284;AF017174;AB010826;BC018270;	ENSMUST00000109313;	Carnitine O-palmitoyltransferase 1, muscle isoform (CPT1-M) (EC 2.3.1.21) (Carnitine O-palmitoyltransferase I, muscle isoform) (CPT I) (CPTI-M) (Carnitine palmitoyltransferase 1B)		NP_034078.2;	Mm.227738;	mmu:12895;	carnitine O-palmitoyltransferase activity; fatty acid beta-oxidation; integral to membrane; long-chain fatty acid transport; mitochondrial outer membrane	GO:0004095; GO:0006635; GO:0016021; GO:0015909; GO:0005741	Lipid metabolism; fatty acid beta-oxidation.	Carnitine/choline acetyltransferase family	Mitochondrion outer membrane; Multi-pass membrane protein.	0.061827935550532	0.0942061885509691	0.656304394663846	0.511880321273634	599	0.88917894470176	0.951006880252292	1.18227828319092	2.51943850853998	2.83344373317907	2.21622581456958	2.33039934893178	75541400.2104889	4.07749024085748	46125904.2132291	3.64772114490058	18526445.3740551	12645128.9396702	0.141965955477666	0.0930098158996855	1.52635454768324	0.12740136913839	659	0.88917894470176	1.03114490017943	1.22158399619597	2.51943850853998	2.83344373317907	2.22170139388732	2.1545966948978	75541400.2104889	4.07749024085748	54269534.5376408
AAFGLSEAGFNTACLTK	Q8K2B3	Sdha	Sdha	IPI00230351;	AK029520;AK034928;AK049590;AK050475;AK075990;AK145923;AK147286;AK147624;AK153085;AK162148;AK169254;AK004362;BC011301;BC031849;DQ402975;AF095938;	ENSMUST00000022062;	Succinate dehydrogenase [ubiquinone] flavoprotein subunit, mitochondrial (EC 1.3.5.1) (Flavoprotein subunit of complex II) (Fp)		NP_075770.1;	Mm.158231;	mmu:66945;	flavin adenine dinucleotide binding; mitochondrial respiratory chain complex II; nervous system development; respiratory electron transport chain; succinate dehydrogenase (ubiquinone) activity; succinate metabolic process; tricarboxylic acid cycle	GO:0050660; GO:0005749; GO:0007399; GO:0022904; GO:0008177; GO:0006105; GO:0006099	Carbohydrate metabolism; tricarboxylic acid cycle; fumarate from succinate (eukaryal route): step 1/1.	FAD-dependent oxidoreductase 2 family, FRD/SDH subfamily	Mitochondrion inner membrane; Peripheral membrane protein; Matrix side.	-0.0148035150134196	0.0454417868410721	-0.325768770167278	0.744680538714589	839	2.07250758330962	2.0577040682962	0.67477610811567	2.47046022354582	1.19201504662323	2.4640703733238	1.19748529989741	20228542.1830851	1.29019760361349	20695413.4935307	1.30346462773814	15678638.7809359	15877234.4512661	0.00563944606434982	0.0479259156400497	0.117670074510526	0.906354679705199	923	2.07250758330962	2.07814702937397	0.744781681883908	2.47046022354582	1.19201504662323	2.58455583916363	1.24368285912004	20228542.1830851	1.29019760361349	19631741.9849784
AAFTMFSR	P16675	Ctsa Ppgb	Ctsa	IPI00137177;	J05261;BC018534;	ENSMUST00000103092;ENSMUST00000103093;	Lysosomal protective protein (EC 3.4.16.5) (Carboxypeptidase C) (Carboxypeptidase L) (Cathepsin A) (Protective protein cathepsin A) (PPCA) (Protective protein for beta-galactosidase) [Cleaved into: Lysosomal protective protein 32 kDa chain; Lysosomal protective protein 20 kDa chain]	A35732;	NP_001033581.1;	Mm.359633;Mm.474586;	mmu:19025;	lysosome; mitochondrion; nucleus; proteolysis; serine-type carboxypeptidase activity	GO:0005764; GO:0005739; GO:0005634; GO:0006508; GO:0004185		Peptidase S10 family	Lysosome.	0.182971799787227	0.118247232522504	1.54736644472761	0.123762996366035	159	-1.03495169506249	-0.851979895275265	0.766329652282689	1.35179577630134	1.30614383526346	1.00908088928878	1.18439518923478	776892.332613727	0.850048181608848	710711.979494512	0.712376061754923	913939.173592888	997664.039613696	-0.159072774541257	0.117126479281623	-1.35812820053078	0.176171375992353	175	-1.03495169506249	-1.19402446960375	0.794390432249653	1.35179577630134	1.30614383526346	1.34938610483892	1.13011595590393	776892.332613727	0.850048181608848	804691.02901816
AAFVLPEFTR	Q64674	Srm	Srm	IPI00136912;	Z67748;L19311;BC005566;	ENSMUST00000006611;	Spermidine synthase (SPDSY) (EC 2.5.1.16) (Putrescine aminopropyltransferase)		NP_033298.1;	Mm.10;	mmu:20810;	spermidine biosynthetic process; spermidine synthase activity	GO:0008295; GO:0004766	Amine and polyamine biosynthesis; spermidine biosynthesis; spermidine from putrescine: step 1/1.	Spermidine/spermine synthase family		0.513763345498614	0.296029967020635	1.73551127498792	0.0905467132839635	39	-0.554491183821339	-0.0407278383227257	0.959246727609483	1.03872240066691	1.87328929832289	1.01858247661239	25.0094902788896	1115994.77971868	0.906266522069375	1514038.91350709	0.842068506179158	1231420.06522586	1797999.69052039	0.801367811763112	0.28209973323469	2.84072516685588	0.00685192218255003	43	-0.554491183821339	0.246876627941773	0.956646739474638	1.03872240066691	1.87328929832289	1.18953893735792	4.81835379588254	1115994.77971868	0.906266522069375	1971125.27137609
AAGAGNEAAALFLATSGAHANHR	Q810B6	Ankfy1 Ankhzn Kiaa1255	Ankfy1	IPI00187356;IPI00329843;	AB011370;AB098329;AB098157;AB098157;AL663082;AL808023;AL808023;AL663082;BC139231;AK122479;	ENSMUST00000127610;ENSMUST00000155998;	Ankyrin repeat and FYVE domain-containing protein 1 (Ankyrin repeats hooked to a zinc finger motif)	T00253;	NP_033801.4;	Mm.10313;	mmu:11736;	endocytosis; endosome membrane; metal ion binding	GO:0006897; GO:0010008; GO:0046872			Cytoplasm. Endosome membrane; Peripheral membrane protein.	0.713790318125767	0.194902452014758	3.66229521869595	0.00165609760790089	19	-0.443150345529959	0.270639972595807	0.446577619745064	0.239898902705383	0.541348788566305	0.641847199146357	2.37159054144946	556787.543237871	0.523095059124178	658647.810090707	0.361325520364268	1064409.86877243	1822865.4577919	-0.115827067220798	0.139065405315257	-0.83289634081332	0.414275872945129	21	-0.443150345529959	-0.558977412750758	0.333467127306584	0.239898902705383	0.541348788566305	0.422276845204782	0.755445274839882	556787.543237871	0.523095059124178	322390.941143876
AAGHLDDLPGALSALSDLHAHK	P01942	Hba Hba-a1	Hba	IPI00469114;	V00714;M10703;M10840;		Hemoglobin subunit alpha (Alpha-globin) (Hemoglobin alpha chain)	HAMS;		Mm.196110;Mm.459653;		heme binding; hemoglobin complex; iron ion binding; oxygen binding; oxygen transporter activity; response to stilbenoid	GO:0020037; GO:0005833; GO:0005506; GO:0019825; GO:0005344; GO:0035634		Globin family		-0.608051570226172	0.0692195708206447	-8.78438804253349	5.13612595312885e-18	1239	1.33538541685705	0.727333846630884	1.24883309312551	3.5527944426134	2.66050115402281	3.24293905854616	4.45866650310297	823310703.55221	4.78017792064851	372392249.206229	4.55826038490397	172234322.073207	81696133.5599687	-0.569711619120228	0.0632437866719916	-9.00818323980168	6.89083822500688e-19	1363	1.33538541685705	0.76567379773681	1.19411906483663	3.5527944426134	2.66050115402281	3.40651112123705	4.44903708512172	823310703.55221	4.78017792064851	407485745.477971
AAGSLLTDECR	Q922B1	Macrod1 Lrp16	Macrod1	IPI00122740;	AK052998;BC008653;	ENSMUST00000040261;	O-acetyl-ADP-ribose deacetylase MACROD1 (EC 3.5.1.-) (MACRO domain-containing protein 1) (Protein LRP16)		NP_598908.2;	Mm.439977;	mmu:107227;	deacetylase activity; mitochondrion; purine nucleoside metabolic process	GO:0019213; GO:0005739; GO:0042278				0.185044228342541	0.106131854351037	1.74353147294022	0.0822686504660958	299	1.18537871206089	1.37042294040343	0.941826776803564	2.17968642429998	1.83881016431483	2.13395554041801	1.55715106446614	11561470.6942295	1.41360805770938	11510893.8888411	1.25312721423366	8178696.0898934	9185734.50332451	0.0824151930278384	0.105344796842646	0.782337576206467	0.434578911624149	329	1.18537871206089	1.26779390508872	0.978346378657291	2.17968642429998	1.83881016431483	2.27846501062801	1.79718880291396	11561470.6942295	1.41360805770938	10868460.4001359
AAGTCGVLLR	Q9D773	Mrpl2	Mrpl2	IPI00109740;	AK009521;BC027762;	ENSMUST00000002844;	39S ribosomal protein L2, mitochondrial (L2mt) (MRP-L2)		NP_079578.1;	Mm.391007;	mmu:27398;	mitochondrial large ribosomal subunit; structural constituent of ribosome; translation	GO:0005762; GO:0003735; GO:0006412		Ribosomal protein L2P family	Mitochondrion.	0.641719928785586	0.309712756325573	2.07198417139462	0.0415296645384638	79	-0.150400315574612	0.491319613210973	1.41928214955535	1.71909408530021	11.4301228606624	2.12634798031356	4.32783044506815	7344596.49445172	2.21733201480162	9505025.27581863	1.6249660296163	3312357.57451904	5849368.60376277	0.340387721467878	0.288906645875404	1.17819277032026	0.241932396535389	87	-0.150400315574612	0.189987405893265	1.38554759958381	1.71909408530021	11.4301228606624	2.17697000833914	11.4584964098208	7344596.49445172	2.21733201480162	7010603.76958281
AAGTTVVEVEEIVDIGSFAPEDIHIPK	Q9D0K2	Oxct1 Oxct Scot	Oxct1	IPI00132653;	AB085609;AK009027;AK011354;AK151662;AK167681;BC003422;	ENSMUST00000110690;	Succinyl-CoA:3-ketoacid coenzyme A transferase 1, mitochondrial (EC 2.8.3.5) (3-oxoacid CoA-transferase 1) (Somatic-type succinyl-CoA:3-oxoacid CoA-transferase) (SCOT-s)	PD0443;	NP_077150.1;	Mm.13445;	mmu:67041;	3-oxoacid CoA-transferase activity; ketone body catabolic process; ketone catabolic process; mitochondrial matrix; mitochondrion	GO:0008260; GO:0046952; GO:0042182; GO:0005759; GO:0005739	Ketone metabolism; succinyl-CoA degradation; acetoacetyl-CoA from succinyl-CoA: step 1/1.	3-oxoacid CoA-transferase family	Mitochondrion matrix.	0.189682284888337	0.0654247162487945	2.89924505238999	0.00385461577990162	719	1.52745563264577	1.71713791753411	0.899441143593325	3.04625787621946	1.99433476895359	2.92633146654088	1.70419128053688	100791775.075249	4.61745025793564	45786860.0622202	2.37042953002279	21828448.482369	19315849.5041951	0.0617363451683899	0.0614802306974447	1.00416580204791	0.315605781840761	791	1.52745563264577	1.58919197781416	0.884546485318031	3.04625787621946	1.99433476895359	3.04100432679661	1.91355378661005	100791775.075249	4.61745025793564	35820947.553619
AAGVSVEPFWPGLFAK	P47955	Rplp1	Rplp1	IPI00113377;	U29402;AK007832;AK010656;AK088070;BC058685;	ENSMUST00000008036;	60S acidic ribosomal protein P1		NP_061341.1;	Mm.3158;	mmu:56040;	ribosome; structural constituent of ribosome; translational elongation	GO:0005840; GO:0003735; GO:0006414		Ribosomal protein L12P family		-0.178125660392912	0.220308331343104	-0.808528934457326	0.423691030747064	39	-0.334896273517755	-0.513021933910666	0.71388058456679	0.771124150517289	2.30257608547683	0.725547221479818	1.41426160076454	994535.808776358	0.748436826272754	694390.800903055	0.58696663160794	1328817.3081076	1183015.80279076	0.161585468449023	0.186253153513732	0.867558295796101	0.390452106911817	43	-0.334896273517755	-0.173310805068732	0.631615173763908	0.771124150517289	2.30257608547683	0.77343893958537	4.46272775248282	994535.808776358	0.748436826272754	880078.282976035
AAHKQEPGLGFSFELTEQQK	P45952	Acadm	Acadm	IPI00134961;	U07159;	ENSMUST00000072697;	Medium-chain specific acyl-CoA dehydrogenase, mitochondrial (MCAD) (EC 1.3.8.7)	A55724;	NP_031408.1;	Mm.10530;	mmu:11364;	axon; cardiac muscle cell differentiation; carnitine biosynthetic process; carnitine metabolic process, CoA-linked; fatty acid beta-oxidation using acyl-CoA dehydrogenase; fatty-acyl-CoA binding; flavin adenine dinucleotide binding; glycogen biosynthetic process; isomerase activity; liver development; medium-chain fatty acid catabolic process; medium-chain fatty acid metabolic process; medium-cha…	GO:0030424; GO:0055007; GO:0045329; GO:0019254; GO:0033539; GO:0000062; GO:0050660; GO:0005978; GO:0016853; GO:0001889; GO:0051793; GO:0051791; GO:0070991; GO:0005759; GO:0031966; GO:0005739; GO:0009791; GO:0051289; GO:0006111; GO:0009409; GO:0046688; GO:0042493; GO:0051384; GO:0007584; GO:0042594	Lipid metabolism; mitochondrial fatty acid beta-oxidation.	Acyl-CoA dehydrogenase family	Mitochondrion matrix.	-0.0607575545424643	0.0640841237613055	-0.948090587440476	0.343299633053669	1059	1.78337912459563	1.72262157005316	1.06897620226283	3.41126116919581	1.9128076145723	3.22831136332141	1.8740688143257	29965408.3357234	1.45960911257831	29303935.2933232	1.45881105219147	20529748.7371748	20087546.8069027	0.0421796507431551	0.0571077027655671	0.73859827484756	0.460299738805752	1165	1.78337912459563	1.82555877533878	0.996934321154167	3.41126116919581	1.9128076145723	3.37573317638973	1.84915063924101	29965408.3357234	1.45960911257831	30473003.1774553
AAHPQSDGANLPK	Q9D1N2	Gpihbp1 Hbp1	Gpihbp1	IPI00133956;	AB095543;AK003305;BC061225;	ENSMUST00000023243;	Glycosylphosphatidylinositol-anchored high density lipoprotein-binding protein 1 (GPI-HBP1) (GPI-anchored HDL-binding protein 1) (High density lipoprotein-binding protein 1)		NP_081006.1;	Mm.46367;	mmu:68453;	anchored to external side of plasma membrane; anchored to plasma membrane; apical plasma membrane; basolateral plasma membrane; cholesterol homeostasis; chylomicron binding; external side of plasma membrane; high-density lipoprotein particle; high-density lipoprotein particle binding; intracellular; intracellular protein transport; lipid binding; lipid transport; positive regulation of chylomicro…	GO:0031362; GO:0046658; GO:0016324; GO:0016323; GO:0042632; GO:0035478; GO:0009897; GO:0034364; GO:0008035; GO:0005622; GO:0006886; GO:0008289; GO:0006869; GO:0090321; GO:0090319; GO:0051006; GO:0017038; GO:0034394; GO:0050821; GO:0008320; GO:0071503; GO:0045056; GO:0070328			Cell surface.	0.084803524726642	0.316545995393918	0.267902693323004	0.791661035505012	19	-0.943626254862185	-0.858822730135543	0.725297992413887	0.709858761619446	0.752266861971872	0.695051690448861	0.80930751604486	444971.963701846	0.564075447266429	701908.442189453	0.741039842874692	788851.856357565	947193.931525412	0.0795381155307936	0.311154473453617	0.255622600080182	0.800729364078179	21	-0.943626254862185	-0.864088139331391	0.746122216204314	0.709858761619446	0.752266861971872	0.77781574813727	0.900157880582788	444971.963701846	0.564075447266429	521966.310000086
AAHSEGHITAGLDMK	P80314	Cct2 Cctb	Cct2	IPI00320217;	Z31553;AB022156;BC007470;BC026918;	ENSMUST00000047672;	T-complex protein 1 subunit beta (TCP-1-beta) (CCT-beta)	S43059;	NP_031662.2;	Mm.247788;Mm.473578;	mmu:12461;	ATP binding; binding of sperm to zona pellucida; chaperone-mediated protein complex assembly; chaperonin-containing T-complex; microtubule; nucleus; protein folding; sperm part; zona pellucida receptor complex	GO:0005524; GO:0007339; GO:0051131; GO:0005832; GO:0005874; GO:0005634; GO:0006457; GO:0097223; GO:0002199		TCP-1 chaperonin family	Cytoplasm.	-0.240295629471454	0.12780269632339	-1.88020782334211	0.0614072012221374	219	-0.344602436088312	-0.584898065559766	0.971216407696959	1.81716511743569	5.27322191352705	1.75980309386997	3.00873467958179	10433661.6165521	3.32026488644686	1619916.10609612	0.991073792540129	3142418.44352291	1634506.04615854	-0.013413598168957	0.127157307509644	-0.105488221099205	0.916076162274748	241	-0.344602436088312	-0.358016034257269	1.01128039581449	1.81716511743569	5.27322191352705	1.95652223916434	5.46490115512086	10433661.6165521	3.32026488644686	5706465.8720325
AAHSQCAYSNPEGTVLLACEESR	Q9DBB9	Cpn2	Cpn2	IPI00119522;	AK005049;BC025836;BC138287;BC138288;	ENSMUST00000064856;	Carboxypeptidase N subunit 2 (Carboxypeptidase N 83 kDa chain) (Carboxypeptidase N large subunit) (Carboxypeptidase N polypeptide 2) (Carboxypeptidase N regulatory subunit)		NP_082180.2;	Mm.290614;	mmu:71756;	extracellular region	GO:0005576			Secreted.	-0.466732586094089	0.143095252744826	-3.26169161548907	0.00163630906468439	79	-0.0215210009485178	-0.488253587042607	0.655744827292003	2.01863472803431	93.7983662034704	2.26384805778051	4.63662350438187	3743617.2156933	1.18773916010199	3580169.55406934	1.28370132816296	3151884.97731425	2788942.7825028	-0.347145043895581	0.149218565546797	-2.3264199238446	0.0223206129783218	87	-0.0215210009485178	-0.368666044844098	0.715627100512836	2.01863472803431	93.7983662034704	2.04785526663064	5.55477049017801	3743617.2156933	1.18773916010199	2836950.10072974
AAIANLCIGDLITAIDGEDTSSMTHLEAQNK	O70400	Pdlim1 Clim1	Pdlim1	IPI00309768;	AF053367;AK076285;AK088089;AK146225;BC004809;	ENSMUST00000068439;	PDZ and LIM domain protein 1 (C-terminal LIM domain protein 1) (Elfin) (LIM domain protein CLP-36)		NP_058557.2;	Mm.5567;	mmu:54132;	cytoplasm; cytoskeleton; metal ion binding; regulation of transcription, DNA-dependent; response to hypoxia; transcription coactivator activity; transcription factor complex; zinc ion binding	GO:0005737; GO:0005856; GO:0046872; GO:0006355; GO:0001666; GO:0003713; GO:0005667; GO:0008270			Cytoplasm › cytoskeleton.	-0.0892418108594638	0.0698387719439855	-1.27782617556678	0.202550458196672	239	0.537287702455278	0.448045891595815	0.554328067301821	1.43833316781708	2.67702603510976	1.42684099819185	3.18458672416309	4106057.34691091	1.22574706592619	3921067.12850645	1.18478544347961	3349840.64906434	3309516.63027747	-0.405857312824191	0.070035498020222	-5.79502287121601	1.94824951400457e-08	263	0.537287702455278	0.131430389631088	0.581758539106128	1.43833316781708	2.67702603510976	1.55265802504328	11.813538934195	4106057.34691091	1.22574706592619	4004952.00338438
AAIDWFDGKEFSGNPIK	P56959	Fus	Fus	IPI00117063;	AF224264;	ENSMUST00000106251;	RNA-binding protein FUS (Protein pigpen)		NP_631888.1;	Mm.277680;	mmu:233908;	DNA binding; RNA binding; cytoplasm; metal ion binding; nucleotide binding; nucleus; zinc ion binding	GO:0003677; GO:0003723; GO:0005737; GO:0046872; GO:0000166; GO:0005634; GO:0008270		RRM TET family	Nucleus.	0.255328676105027	0.126945747238312	2.01132122705699	0.0477019996181626	79	-1.13434610658324	-0.879017430478217	0.581738495872295	2.0822946294472	1.83567838542617	1.95421620495105	2.22318254131535	1833572.77256027	1.28297860426033	1615080.92825278	1.04418806953024	1429153.04002079	1546733.74977303	0.133089665912684	0.124135660551635	1.07213080690319	0.286626330206514	87	-1.13434610658324	-1.00125644067056	0.595333714040779	2.0822946294472	1.83567838542617	2.01235589992574	2.00983066693486	1833572.77256027	1.28297860426033	1367662.93016143
AAIDYQK	Q3THS6	Mat2a	Mat2a	IPI00454016;	AB070266;AK166671;AK168155;	ENSMUST00000059472;	S-adenosylmethionine synthase isoform type-2 (AdoMet synthase 2) (EC 2.5.1.6) (Methionine adenosyltransferase 2) (MAT 2)		NP_663544.1;	Mm.29815;Mm.485037;Mm.489639;	mmu:232087;	ATP binding; S-adenosylmethionine biosynthetic process; circadian rhythm; metal ion binding; methanogenesis; methionine adenosyltransferase activity; one-carbon metabolic process; response to cAMP; response to drug; response to hormone stimulus; response to light stimulus	GO:0005524; GO:0006556; GO:0007623; GO:0046872; GO:0015948; GO:0004478; GO:0006730; GO:0051591; GO:0042493; GO:0009725; GO:0009416	Amino-acid biosynthesis; S-adenosyl-L-methionine biosynthesis; S-adenosyl-L-methionine from L-methionine: step 1/1.	AdoMet synthase family		0.365671510966945	0.118972683126708	3.07357539022212	0.00248963431344243	159	-0.679375848766876	-0.313704337799932	0.771031109538039	2.24364433700468	3.30250823763765	2.0738495443508	6.61084114709762	7415157.77704788	2.32010460413866	9055085.30093546	2.20409681482062	3196044.59377416	4108297.43958974	0.285065245937911	0.113847452709644	2.50392291749329	0.0131977317005074	175	-0.679375848766876	-0.394310602828964	0.772150992015055	2.24364433700468	3.30250823763765	2.14198019102878	5.43221555712992	7415157.77704788	2.32010460413866	14124668.4556642
AAISQPGISEDLEK	Q8BP40	Acp6 Acpl1 Lpap	Acp6	IPI00457974;IPI00624175;	AB030038;AK077729;AK089736;AK160271;AK165356;AK171757;BC047276;AF216223;	ENSMUST00000090759;	Lysophosphatidic acid phosphatase type 6 (EC 3.1.3.2) (Acid phosphatase 6, lysophosphatidic) (Acid phosphatase-like protein 1) (PACPL1)		NP_062774.2;	Mm.101368;	mmu:66659;	acid phosphatase activity; extracellular region; mitochondrion	GO:0003993; GO:0005576; GO:0005739		Histidine acid phosphatase family	Secreted.	-0.111433277550449	0.134436351715474	-0.828892454522199	0.408586357532867	139	0.157118465023603	0.0456851874731534	0.8149770704439	1.14009743039436	7.25629180646011	1.18985854958078	26.0447338709072	1527501.17785973	0.774295424999524	2014301.34465418	0.958184104950101	1972762.75765245	2102207.01246038	0.119336561037295	0.1246283673534	0.957539311246057	0.339805724550368	153	0.157118465023603	0.276455026060897	0.790678351451621	1.14009743039436	7.25629180646011	1.1858246100386	4.28939428931701	1527501.17785973	0.774295424999524	2626917.346114
AAKEILCR	Q8C0V1	Ccdc79	Ccdc79	IPI00224040;IPI00458396;IPI00775871;IPI00828233;	AK029754;AK030157;BC113771;BC129814;	ENSMUST00000162014;	Coiled-coil domain-containing protein 79		NP_851289.2;	Mm.249775;	mmu:320022;	DNA binding; chromatin binding	GO:0003677; GO:0003682		CCDC79 family		-0.404800515031706	0.505613137053496	-0.800613127638881	0.433253303913981	19	-1.55886798262316	-1.96366849765487	1.15850523645586	0.848310774356356	0.54418384610663	1.4841721906388	0.755816061830847	306182.636986031	0.597665218082601	473217.634658263	0.945430474104415	512297.901437716	500531.395612704	-0.0583704695009807	0.40641162988499	-0.143624013706249	0.887166667772923	21	-1.55886798262316	-1.61723845212414	0.974540853021668	0.848310774356356	0.54418384610663	1.10400462161957	0.682648016542971	306182.636986031	0.597665218082601	277776.676288236
AALAHSEIATTQAASTK	Q9QXS1	Plec Plec1	Plec	IPI00229509;IPI00400214;IPI00421267;IPI00421268;IPI00421271;IPI00468273;IPI00626385;IPI00944107;IPI01008141;IPI01008579;	AY480033;AY480038;AY480043;AF188006;AF188007;AF188008;AF188009;AF188010;AF188011;AF188012;AF188013;AF188014;AF188015;AF188016;AF188017;AF188018;AF188019;AF188020;AF188021;AF188022;AF188023;	ENSMUST00000165453;ENSMUST00000167754;ENSMUST00000170728;ENSMUST00000170915;ENSMUST00000171634;	Plectin (PCN) (PLTN) (Plectin-1) (Plectin-6)	D59404;	NP_001157012.1;NP_001157014.1;NP_001157021.1;NP_001157675.1;NP_035247.2;NP_958791.2;NP_958796.2;	Mm.234912;	mmu:18810;	contractile fiber; cytoskeleton; hemidesmosome; hemidesmosome assembly; sarcolemma	GO:0043292; GO:0005856; GO:0030056; GO:0031581; GO:0042383		Plakin or cytolinker family	Cytoplasm › cytoskeleton. Cell junction › hemidesmosome.	-0.0165909738905463	0.0435722239647243	-0.380769499027137	0.703440638150847	1219	-1.1481552706043	-1.16474624449484	0.779748048455127	2.07525779069441	1.80747137937376	2.05029381249895	1.7602922715481	10525389.6783056	4.50558329555918	10269351.2576181	4.25858248621752	2336077.03772332	2411448.24383556	0.0777712547874348	0.0421750862461944	1.84400938348887	0.0654022553713147	1341	-1.1481552706043	-1.07038401581686	0.789868545000233	2.07525779069441	1.80747137937376	1.929362769257	1.80249587133886	10525389.6783056	4.50558329555918	9799797.21096172
AALAQAADCEVEQWNSDDPIPR	Q91Z53	Grhpr Glxr	Grhpr	IPI00130530;	AY113690;BC010194;	ENSMUST00000045078;	Glyoxylate reductase/hydroxypyruvate reductase (EC 1.1.1.79) (EC 1.1.1.81)		NP_525028.1;	Mm.196574;	mmu:76238;	NAD binding; NADPH binding; cytoplasm; excretion; glycerate dehydrogenase activity; glyoxylate reductase (NADP) activity; hydroxypyruvate reductase activity; protein oligomerization	GO:0051287; GO:0070402; GO:0005737; GO:0007588; GO:0008465; GO:0030267; GO:0016618; GO:0051259		D-isomer specific 2-hydroxyacid dehydrogenase family		0.236301223881005	0.0858891755173899	2.75123404617106	0.00639188356238969	239	0.860038250735361	1.09633947461637	0.681724196194173	2.41248346890717	2.80508857233317	2.31957451147993	2.11574477174746	19493688.7349961	2.27361343882932	17288027.0792347	1.82843322029572	8573879.97540754	9455104.45081427	-0.0674346248840731	0.0846119421869197	-0.796987081741967	0.42617743146939	263	0.860038250735361	0.792603625851288	0.702839578057711	2.41248346890717	2.80508857233317	2.28917884492973	2.8881760949189	19493688.7349961	2.27361343882932	16877500.1897178
AALAQLQEAFQMTDMTMEAACGK	O88492	Plin4 Kiaa1881	Plin4	IPI00131113;IPI00856568;	AF064748;AK173286;AK080156;	ENSMUST00000002908;	Perilipin-4 (Adipocyte protein S3-12)	T17372;	NP_065593.2;	Mm.12966;	mmu:57435;	lipid particle; plasma membrane	GO:0005811; GO:0005886		Perilipin family	Cell membrane. Cytoplasm. Lipid droplet.	0.0192133284562192	0.0917898881110095	0.209318573664485	0.834301283169208	419	-0.502989674062407	-0.483776345606188	0.963793825165599	1.31570713260583	2.6157736439786	1.38625046565064	2.86547798014726	1464954.82779286	1.03141927665807	1517222.3019379	0.978156893076684	1420329.11440196	1551103.21531921	-0.0271735702686315	0.0831578260410614	-0.326771051653201	0.74398936530935	461	-0.502989674062407	-0.530163244331038	0.913790622543785	1.31570713260583	2.6157736439786	1.31937896495803	2.48862775582043	1464954.82779286	1.03141927665807	1448276.48544435
AALDFSDAR	E9Q401	Ryr2	Ryr2	IPI00338309;	AF295105;AB012003;X83933;D38217;	ENSMUST00000021750;	Ryanodine receptor 2 (RYR-2) (RyR2) (Cardiac muscle ryanodine receptor) (Cardiac muscle ryanodine receptor-calcium release channel) (Type 2 ryanodine receptor)	I48742;	NP_076357.2;	Mm.239871;	mmu:20191;	BMP signaling pathway; Purkinje myocyte to ventricular cardiac muscle cell signaling; Z disc; calcium channel complex; calcium ion binding; calmodulin binding; canonical Wnt receptor signaling pathway; cardiac muscle contraction; cardiac muscle hypertrophy; cellular response to caffeine; detection of calcium ion; embryonic heart tube morphogenesis; integral to membrane; intrinsic apoptotic signal…	GO:0030509; GO:0086029; GO:0030018; GO:0034704; GO:0005509; GO:0005516; GO:0060070; GO:0060048; GO:0003300; GO:0071313; GO:0005513; GO:0003143; GO:0016021; GO:0008627; GO:0003220; GO:0010460; GO:0086094; GO:0043234; GO:0043621; GO:0010881; GO:0086005; GO:0014808; GO:0001666; GO:0051775; GO:0005219; GO:0033017; GO:0043924		Ryanodine receptor (TC 1.A.3.1) family, RYR2 subfamily	Sarcoplasmic reticulum membrane; Multi-pass membrane protein. Membrane; Multi-pass membrane protein.	0.0650595957720834	0.0557271108113075	1.16746759027892	0.243289438142125	1039	-0.546739624584267	-0.481680028812184	0.920762982569118	1.91122063926515	3.49566878515239	1.91342049643924	3.97238910061873	3020768.46996687	1.54682394545044	2863066.29387154	1.37414597210679	1952884.47586529	2083524.13207018	0.325364839068979	0.0509674000339509	6.38378333703983	2.50663116101305e-10	1143	-0.546739624584267	-0.221374785515287	0.881308733645601	1.91122063926515	3.49566878515239	1.58652527302397	7.16669366536512	3020768.46996687	1.54682394545044	2812471.67019519
AALDGTPGMIGYGMAK	Q8BVI4	Qdpr Dhpr	Qdpr	IPI00459279;	AK011351;AK078123;AK159107;AK161660;AK166694;BC002107;	ENSMUST00000015950;	Dihydropteridine reductase (EC 1.5.1.34) (HDHPR) (Quinoid dihydropteridine reductase)		NP_077198.1;	Mm.30204;	mmu:110391;	6,7-dihydropteridine reductase activity; L-phenylalanine catabolic process; NADH binding; NADPH binding; cellular response to drug; cytosol; liver development; mitochondrion; response to aluminum ion; response to glucagon stimulus; response to lead ion; tetrahydrobiopterin biosynthetic process	GO:0004155; GO:0006559; GO:0070404; GO:0070402; GO:0035690; GO:0005829; GO:0001889; GO:0005739; GO:0010044; GO:0033762; GO:0010288; GO:0006729		Short-chain dehydrogenases/reductases (SDR) family		0.153754664311206	0.105076750959527	1.46326054914306	0.14497377818844	199	0.137963338640654	0.29171800295186	0.761353392710017	1.71647679495707	12.4415428900854	1.75924887617713	6.03064897735313	2419851.43740214	0.969084832288944	2931713.48086914	0.959751496379322	2497048.09813867	3054658.93195173	-0.0314928499517842	0.0961491335661827	-0.327541692615531	0.743571105985139	219	0.137963338640654	0.10647048868887	0.729086903885839	1.71647679495707	12.4415428900854	1.74514473982318	16.3908775221543	2419851.43740214	0.969084832288944	2512279.87468474
AALGLGLFK	Q5NC32	Slc16a11 Mct11	Slc16a11	IPI00407840;	AL669869;AL669869;CR933731;CR933731;BC130255;	ENSMUST00000094055;ENSMUST00000126388;ENSMUST00000171032;	Monocarboxylate transporter 11 (MCT 11) (Solute carrier family 16 member 11)		NP_694721.2;	Mm.289238;	mmu:216867;	integral to membrane; plasma membrane; symporter activity	GO:0016021; GO:0005886; GO:0015293		Major facilitator superfamily, Monocarboxylate porter (TC 2.A.1.13) family	Cell membrane; Multi-pass membrane protein.	0.96292139749507	1.23475782734596	0.779846360289784	0.445087887583141	19	-8.94711108930147	-7.9841896918064	2.82918560437605	2.88455049341191	0.322400209924868	2.496069820415	0.312626567850278	41400.221903203	2.39725837607943	42107.5952494563	1.9873913685167	17269.8205234392	21187.369491739	-0.808750348082245	1.06007040147399	-0.762921355937971	0.453995788362653	21	-8.94711108930147	-9.75586143738371	2.54195952415987	2.88455049341191	0.322400209924868	1.93035898336715	0.197866584694424	41400.221903203	2.39725837607943	2699.4426543058
AALHVVSKPVQEVHPDVPMASPNVSTR	E9QP35	2310042D19Rik	2310042D19Rik	IPI01008446;		ENSMUST00000105572;	0		NP_766005.2;	Mm.431343;	mmu:74183;						-0.0886468202899715	0.200911109174837	-0.441224084890345	0.664030786361323	19	-1.17524740247495	-1.26389422276493	0.460345182875613	0.345001560314549	0.293556539319304	0.581852598983007	0.460364948666458	353409.494375457	0.540003133634722	249580.207231264	0.394194879966169	654458.228782274	633139.139840384	-0.163692585764049	0.195322359161179	-0.838063734572092	0.411432506395558	21	-1.17524740247495	-1.338939988239	0.468366563636496	0.345001560314549	0.293556539319304	0.58689616863523	0.438328957078297	353409.494375457	0.540003133634722	408739.146524833
AALPSHVVTMLDNFPTNLHPMSQLSAAITALNSESNFAR	Q9CZU6	Cs	Cs	IPI00113141;	AB056479;AK012151;AK145643;AK149990;AK163273;AK166814;AK167125;BC013554;BC029754;	ENSMUST00000005826;	Citrate synthase, mitochondrial (EC 2.3.3.1)		NP_080720.1;	Mm.58836;	mmu:12974;	carbohydrate metabolic process; cellular carbohydrate metabolic process; citrate (Si)-synthase activity; mitochondrial matrix; tricarboxylic acid cycle	GO:0005975; GO:0044262; GO:0004108; GO:0005759; GO:0006099	Carbohydrate metabolism; tricarboxylic acid cycle; isocitrate from oxaloacetate: step 1/2.	Citrate synthase family	Mitochondrion matrix.	-0.143291746433961	0.0702936146943725	-2.0384745763463	0.0418783256545469	699	1.55913496942785	1.41584322299389	0.95286099669609	3.33118508389951	2.13655979066517	3.33590124628865	2.35612332786018	42456195.3756937	1.73482920942051	44092562.7424803	1.72193364816802	24472838.6778059	25606423.7953598	0.0345509177129817	0.0683678322376622	0.505368044914381	0.61344516772577	769	1.55913496942785	1.59368588714082	0.969883909332205	3.33118508389951	2.13655979066517	3.35765468588678	2.10684847809667	42456195.3756937	1.73482920942051	49484477.0833852
AALRDYETVVK	Q60676	Ppp5c	Ppp5c	IPI00119180;	AF018262;BC003744;U12204;		Serine/threonine-protein phosphatase 5 (PP5) (EC 3.1.3.16) (Protein phosphatase T) (PPT)		NP_035285.2;	Mm.3294;Mm.475000;Mm.482216;	mmu:19060;	cytosol; metal ion binding; nucleus; phosphoprotein phosphatase activity; protein dephosphorylation; response to morphine	GO:0005829; GO:0046872; GO:0005634; GO:0004721; GO:0006470; GO:0043278		PPP phosphatase family, PP-5 (PP-T) subfamily	Nucleus.	-0.014125103997127	0.144246903138155	-0.097923100529919	0.922116690909412	159	-0.806003492970062	-0.820128596967188	0.934826775786736	1.45856824751415	1.80963018179913	1.03629853617756	1.26358054091732	2486919.05791475	1.78055348475492	877193.540677008	0.845365578883464	1396711.23569593	1037649.93819074	-0.0765710301549821	0.12907057360269	-0.593249321031812	0.553780245032623	175	-0.806003492970062	-0.882574523125044	0.875399221284698	1.45856824751415	1.80963018179913	1.15201254245819	1.30528642315565	2486919.05791475	1.78055348475492	1557836.13959401
AALSAGKVPPETIDSVIVGNVMQSSSDAAYLAR	Q8BWT1	Acaa2	Acaa2	IPI00226430;	AK050101;AK167567;AK167715;AK169359;CH466528;BC028901;	ENSMUST00000041053;	3-ketoacyl-CoA thiolase, mitochondrial (EC 2.3.1.16) (Acetyl-CoA acyltransferase) (Beta-ketothiolase) (Mitochondrial 3-oxoacyl-CoA thiolase)		NP_803421.1;	Mm.245724;	mmu:52538;	acetyl-CoA C-acyltransferase activity; acetyl-CoA metabolic process; fatty acid beta-oxidation; mitochondrial inner membrane; negative regulation of apoptotic process	GO:0003988; GO:0006084; GO:0006635; GO:0005743; GO:0043066	Lipid metabolism; fatty acid metabolism.	Thiolase family	Mitochondrion.	-0.11973776805624	0.0544978286132057	-2.19711080428671	0.0282133696768678	1139	2.07593883366544	1.95620106560919	0.942749429633153	3.24068111051052	1.56106772413352	3.21406749498007	1.64301489835819	39548578.0656523	1.6307722855526	34747524.4739606	1.50027824289337	24251441.1214997	23160720.1121227	-0.00233347490017305	0.0494492975816908	-0.0471892426038636	0.962369921012796	1253	2.07593883366544	2.07360535876527	0.895223506179315	3.24068111051052	1.56106772413352	3.35703066121192	1.61893421379411	39548578.0656523	1.6307722855526	41262739.6791536
AALSGLLHR	Q99JY0	Hadhb	Hadhb	IPI00115607;	AK033462;AK076814;AK083164;AK083767;AK150889;AK169637;BC005585;	ENSMUST00000026841;ENSMUST00000114783;ENSMUST00000114786;	Trifunctional enzyme subunit beta, mitochondrial (TP-beta) [Includes: 3-ketoacyl-CoA thiolase (EC 2.3.1.16) (Acetyl-CoA acyltransferase) (Beta-ketothiolase)]		NP_663533.1;	Mm.291463;Mm.389348;	mmu:231086;	3-hydroxyacyl-CoA dehydrogenase activity; NAD binding; acetyl-CoA C-acyltransferase activity; endoplasmic reticulum; enoyl-CoA hydratase activity; fatty acid beta-oxidation; fatty-acyl-CoA binding; long-chain-3-hydroxyacyl-CoA dehydrogenase activity; long-chain-enoyl-CoA hydratase activity; mitochondrial fatty acid beta-oxidation multienzyme complex; mitochondrial inner membrane; mitochondrial nu…	GO:0003857; GO:0051287; GO:0003988; GO:0005783; GO:0004300; GO:0006635; GO:0000062; GO:0016509; GO:0016508; GO:0016507; GO:0005743; GO:0042645; GO:0005741	Lipid metabolism; fatty acid beta-oxidation.	Thiolase family	Mitochondrion. Mitochondrion inner membrane. Mitochondrion outer membrane. Endoplasmic reticulum.	-0.0649005288573546	0.0571315203132677	-1.13598462812625	0.256295297476226	819	1.87810341489257	1.81320288603521	0.838199430036772	2.48414641107069	1.32268883138833	2.31302902063086	1.27565924279361	30066692.9547878	2.05817196305338	16425308.817374	1.2798321879366	14608445.5014063	12833955.0858269	0.0491708691820327	0.064854797291391	0.758168574039468	0.448548331424963	901	1.87810341489257	1.9272742840746	0.99579045009481	2.48414641107069	1.32268883138833	2.4637433643696	1.27835637341708	30066692.9547878	2.05817196305338	18189439.5919213
AALSHDGILNLEAPR	Q99PR8	Hspb2	Hspb2	IPI00121420;IPI00407484;	AF126248;AK012780;	ENSMUST00000042790;	Heat shock protein beta-2 (HspB2)		NP_001158180.1;NP_077761.3;	Mm.1980;	mmu:69253;	cytoplasm; nucleus; response to stress; somatic muscle development	GO:0005737; GO:0005634; GO:0006950; GO:0007525		Small heat shock protein (HSP20) family	Cytoplasm. Nucleus.	0.0374692031751709	0.106000886332957	0.353480093152027	0.724353996201939	119	1.65697747269263	1.6944466758678	0.594928499028438	0.780202823680558	0.470859040957695	0.677050939648731	0.39957052015342	4654103.6173533	0.882578257881586	3844470.40115738	0.721050897119889	5273304.18100751	5331760.09698266	-0.0600955579176217	0.110541198355649	-0.543648511248031	0.587607357539552	131	1.65697747269263	1.59688191477501	0.649282527425195	0.780202823680558	0.470859040957695	0.716089623904871	0.448429916626467	4654103.6173533	0.882578257881586	4527225.75872158
AAMGEEYKAGCPPGNPTAGR	P32921	Wars Wrs	Wars	IPI00113738;IPI00355382;	X69656;X69657;AK004541;BC003450;BC046232;	ENSMUST00000109848;ENSMUST00000161154;ENSMUST00000161410;	Tryptophan--tRNA ligase, cytoplasmic (EC 6.1.1.2) (Tryptophanyl-tRNA synthetase) (TrpRS) [Cleaved into: T1-TrpRS; T2-TrpRS]	S50053;	NP_001157786.1;NP_001157960.1;NP_035840.3;	Mm.38433;	mmu:22375;	ATP binding; angiogenesis; cytoplasm; regulation of angiogenesis; tryptophan-tRNA ligase activity; tryptophanyl-tRNA aminoacylation	GO:0005524; GO:0001525; GO:0005737; GO:0045765; GO:0004830; GO:0006436		Class-I aminoacyl-tRNA synthetase family	Cytoplasm.	-0.0926109784330664	0.0909803879227548	-1.01792243963277	0.309744134147694	239	-1.00533511190972	-1.09794609034279	0.722134441883381	1.05139253979298	1.04581301034614	1.15021748995316	1.04760834805109	978466.929683803	1.03956099025845	599228.331592696	0.678584645854556	941230.90309549	883056.130511287	-0.443888644562243	0.0844300213844696	-5.25747402740672	3.02547792066536e-07	263	-1.00533511190972	-1.44922375647197	0.701328430378918	1.05139253979298	1.04581301034614	1.29136145943337	0.891071136300652	978466.929683803	1.03956099025845	419702.096061146
AAMLKDNKKPFTK	Q07417	Acads	Acads	IPI00116591;	L11163;AK155361;AK169428;CH466529;BC016259;	ENSMUST00000031524;	Short-chain specific acyl-CoA dehydrogenase, mitochondrial (SCAD) (EC 1.3.8.1) (Butyryl-CoA dehydrogenase)	I49605;	NP_031409.2;	Mm.18759;	mmu:11409;	acyl-CoA dehydrogenase activity; butyrate catabolic process; butyryl-CoA dehydrogenase activity; fatty acid beta-oxidation using acyl-CoA dehydrogenase; fatty-acyl-CoA binding; flavin adenine dinucleotide binding; mitochondrial matrix; mitochondrion; protein homotetramerization; response to glucocorticoid stimulus; response to starvation	GO:0003995; GO:0046359; GO:0004085; GO:0033539; GO:0000062; GO:0050660; GO:0005759; GO:0005739; GO:0051289; GO:0051384; GO:0042594	Lipid metabolism; mitochondrial fatty acid beta-oxidation.	Acyl-CoA dehydrogenase family	Mitochondrion matrix.	-0.00294526114237202	0.0462409003038675	-0.0636938537748514	0.949231701925873	719	1.64911273138247	1.6461674702401	0.635707277536138	2.24950549774471	1.36407017842796	2.13398648328784	1.29633620021454	16806087.4020357	1.68568090429532	11889827.1722429	1.2669986302659	9969910.29512864	9384246.27163772	0.178998595740371	0.0411960539853701	4.34504226555143	1.57390046790109e-05	791	1.64911273138247	1.82811132712284	0.592708003017391	2.24950549774471	1.36407017842796	2.18144885181045	1.19328009155969	16806087.4020357	1.68568090429532	16988905.4274688
AAMLLGSVGDALGYGNICR	Q8BGK2	Adprhl1 Arh2	Adprhl1	IPI00221629;	AJ427360;AK081786;AK084501;BC063759;	ENSMUST00000033825;	[Protein ADP-ribosylarginine] hydrolase-like protein 1 (EC 3.2.-.-) (ADP-ribosylhydrolase 2)		NP_766338.1;	Mm.132785;	mmu:234072;	ADP-ribosylarginine hydrolase activity; magnesium ion binding; protein de-ADP-ribosylation	GO:0003875; GO:0000287; GO:0051725		ADP-ribosylglycohydrolase family		0.0432287475714348	0.0702307643159953	0.615524378702928	0.538647359768671	319	0.366008724645032	0.409237472216466	0.643675587185304	1.68338486712193	4.59930256786785	1.8574059733855	4.53869965359142	3507573.05787034	1.11942492810457	3823928.93288852	1.05474123338983	3133370.50998984	3625466.42895415	0.0557664565160077	0.0592456219947921	0.941275568360306	0.347211014478791	351	0.366008724645032	0.421775181161039	0.568264043161786	1.68338486712193	4.59930256786785	1.60519355283252	3.80580371849722	3507573.05787034	1.11942492810457	3203928.80548172
AANFENHSGR	Q64727	Vcl	Vcl	IPI00405227;	L13300;L13299;L18880;AK035184;AK077850;BC008520;BC008554;	ENSMUST00000022369;	Vinculin (Metavinculin)	A60965;T10108;	NP_033528.3;	Mm.279361;	mmu:22330;	actin filament; adherens junction assembly; apical junction assembly; cell adhesion; costamere; epithelial cell-cell adhesion; fascia adherens; focal adhesion; lamellipodium assembly; morphogenesis of an epithelium; plasma membrane; protein localization to cell surface; regulation of cell migration; stress fiber; structural molecule activity	GO:0005884; GO:0034333; GO:0043297; GO:0007155; GO:0043034; GO:0090136; GO:0005916; GO:0005925; GO:0030032; GO:0002009; GO:0005886; GO:0034394; GO:0030334; GO:0001725; GO:0005198		Vinculin/alpha-catenin family	Cytoplasm › cytoskeleton. Cell junction › adherens junction. Cell membrane; Peripheral membrane protein; Cytoplasmic side. Cell junction › focal adhesion.	-0.124499797049957	0.0529455987400313	-2.35146641104702	0.0188506191726683	1279	0.343280128272718	0.218780331222768	0.970508855763808	2.27390312009894	6.62404529950665	2.39474349909286	10.9458811297551	20962638.4375986	4.14781733887567	14561180.5027132	2.72417579205708	5053896.23625057	5345169.18664702	-0.151940738356394	0.0514048066262586	-2.95576908714175	0.00317083406372959	1407	0.343280128272718	0.191339389916322	0.986115168272023	2.27390312009894	6.62404529950665	2.35274112232361	12.2961671580145	20962638.4375986	4.14781733887567	12571875.1946875
AANLYASSPHSEFLDYVNAPIGK	Q8R0N6	Adhfe1	Adhfe1	IPI00227186;IPI00889240;	AK038853;AK050178;BC026584;	ENSMUST00000144177;	Hydroxyacid-oxoacid transhydrogenase, mitochondrial (HOT) (EC 1.1.99.24) (Alcohol dehydrogenase iron-containing protein 1) (ADHFe1)		NP_780445.1;	Mm.28514;	mmu:76187;	hydroxyacid-oxoacid transhydrogenase activity; metal ion binding; mitochondrion; molecular hydrogen transport	GO:0047988; GO:0046872; GO:0005739; GO:0015993		Iron-containing alcohol dehydrogenase family, Hydroxyacid-oxoacid transhydrogenase subfamily	Mitochondrion.	0.221773227566614	0.0970276901601545	2.28566945374618	0.0230818519130173	259	-0.234411309885968	-0.0126380823193507	0.801580272895902	1.61318266112464	6.88184653679635	1.45782867557208	115.352047781802	2978274.20778248	1.42424566849345	2167402.78133257	0.985216890331492	2091123.93575531	2199924.50657572	0.276324695734054	0.0986696312275179	2.80050398786725	0.00545120755801242	285	-0.234411309885968	0.041913385848085	0.853078710003616	1.61318266112464	6.88184653679635	1.61850554118089	38.6154806735768	2978274.20778248	1.42424566849345	3103375.7626805
AANMIPAHDSPLAALAFDASGTK	Q80W47	Wipi2	Wipi2	IPI00131321;	AK155113;AK169051;AK172030;BC044894;	ENSMUST00000036872;	WD repeat domain phosphoinositide-interacting protein 2 (WIPI-2)		NP_848485.1;	Mm.29432;	mmu:74781;	autophagic vacuole assembly; autophagic vacuole membrane; cytosol; nucleus; phosphatidylinositol-3,5-bisphosphate binding; phosphatidylinositol-3-phosphate binding; pre-autophagosomal structure membrane; protein complex	GO:0000045; GO:0000421; GO:0005829; GO:0005634; GO:0080025; GO:0032266; GO:0034045; GO:0043234		WD repeat SVP1 family	Preautophagosomal structure membrane; Peripheral membrane protein; Cytoplasmic side.	0.0347281260498084	0.399111147527018	0.0870136709159632	0.931105880337334	39	-3.15647615675695	-3.12174803070715	1.2932679284833	2.98784670694982	0.946576675560765	3.09277914217034	0.990720298931288	785302.396435066	1.31553821689119	718334.889845391	1.16377464047639	596943.810793162	617245.697630375	0.14745545113364	0.367464348890648	0.401278250744048	0.690202548016569	43	-3.15647615675695	-3.00902070562331	1.24613223560532	2.98784670694982	0.946576675560765	3.53253499727416	1.17398161822964	785302.396435066	1.31553821689119	1918006.65866371
AANNGALPPDLSYIVR	Q9D0M3	Cyc1	Cyc1	IPI00132728;IPI00845772;	AK002815;AK011288;AK151299;AK170272;BC005620;BC082790;	ENSMUST00000023210;	Cytochrome c1, heme protein, mitochondrial (Complex III subunit 4) (Complex III subunit IV) (Cytochrome b-c1 complex subunit 4) (Ubiquinol-cytochrome-c reductase complex cytochrome c1 subunit) (Cytochrome c-1)		NP_079843.1;	Mm.29196;	mmu:66445;	cell junction; electron carrier activity; electron transport chain; heme binding; integral to membrane; iron ion binding; mitochondrial inner membrane; respiratory chain; response to glucagon stimulus	GO:0030054; GO:0009055; GO:0022900; GO:0020037; GO:0016021; GO:0005506; GO:0005743; GO:0070469; GO:0033762		Cytochrome c family	Mitochondrion inner membrane; Single-pass membrane protein; Intermembrane side.	-0.232931230915095	0.119487352736929	-1.94942163818736	0.0520694075818061	339	1.30881485523587	1.07588362432077	1.12882352525498	3.33617883117959	2.54900746108842	3.24423849793873	3.01541767585401	18652890.4989816	1.4089349939546	16366003.4082927	1.40255942401402	13239000.0809239	11668670.2381953	-0.040698204476918	0.133345988065224	-0.305207566177478	0.760378310518991	373	1.30881485523587	1.26811665075896	1.31837311111447	3.33617883117959	2.54900746108842	3.58524449909018	2.8272197963369	18652890.4989816	1.4089349939546	22304237.8880465
AAPAAAAAMAPPGPR	Q8BMF4	Dlat	Dlat	IPI00153660;	AK032124;BC026680;BC031495;BC069862;AY044265;	ENSMUST00000034567;	Dihydrolipoyllysine-residue acetyltransferase component of pyruvate dehydrogenase complex, mitochondrial (EC 2.3.1.12) (Dihydrolipoamide acetyltransferase component of pyruvate dehydrogenase complex) (Pyruvate dehydrogenase complex component E2) (PDC-E2) (PDCE2)		NP_663589.3;	Mm.285076;Mm.471144;	mmu:235339;	acetyl-CoA biosynthetic process from pyruvate; dihydrolipoyllysine-residue acetyltransferase activity; glycolysis; mitochondrial pyruvate dehydrogenase complex; sleep	GO:0006086; GO:0004742; GO:0006096; GO:0005967; GO:0030431		2-oxoacid dehydrogenase family	Mitochondrion matrix.	-0.331135511914207	0.059881240721649	-5.529870589246	4.62338099935043e-08	659	1.10486599190675	0.773730479992556	0.788183632207988	2.46542245692306	2.23142215887042	2.59018430122183	3.34765705655896	21347806.6508807	1.82336280281843	17940408.3775545	1.77964148469277	11707931.4209343	10080911.5385684	-0.30593417527053	0.0581638383727513	-5.25986908411901	1.8995324773028e-07	725	1.10486599190675	0.798931816636212	0.801205554077248	2.46542245692306	2.23142215887042	2.64129686226474	3.30603539283933	21347806.6508807	1.82336280281843	17687255.2253917
AAPAAPAAGETGPDAR	Q9D6Y9	Gbe1	Gbe1	IPI00109823;	AK009815;AK050365;BC017541;	ENSMUST00000163832;	1,4-alpha-glucan-branching enzyme (EC 2.4.1.18) (Brancher enzyme) (Glycogen-branching enzyme)		NP_083079.1;	Mm.396102;	mmu:74185;	1,4-alpha-glucan branching enzyme activity; cation binding; glycogen biosynthetic process; hydrolase activity, hydrolyzing O-glycosyl compounds	GO:0003844; GO:0043169; GO:0005978; GO:0004553	Glycan biosynthesis; glycogen biosynthesis.	Glycosyl hydrolase 13 family, GlgB subfamily		-0.138775810529222	0.0782426200279994	-1.77366006505867	0.0772101456996292	279	-0.463253646112109	-0.602029456641336	0.670790733224732	2.50463868341048	5.40662486832181	2.7229794803865	4.52300041193622	8522053.06060617	2.61785403029482	7505933.00164227	2.30764390573142	3255358.38208917	3252639.18882806	-0.0324101926099087	0.0807739575487245	-0.401245569654776	0.688518472421562	307	-0.463253646112109	-0.495663838722027	0.724718423634789	2.50463868341048	5.40662486832181	2.41057184676201	4.86331997302285	8522053.06060617	2.61785403029482	8659563.84440703
AAPAPAAAPAAAPAA	P09542	Myl3 Mlc1v Mylc	Myl3	IPI00133392;	AK002312;AK011518;AK146943;BC061222;X12972;	ENSMUST00000079784;	Myosin light chain 3 (Myosin light chain 1, slow-twitch muscle B/ventricular isoform) (MLC1SB) (Ventricular/slow twitch myosin alkali light chain)	S01945;	NP_034989.1;	Mm.7353;	mmu:17897;	A band; I band; calcium ion binding; cardiac muscle contraction; motor activity; myosin complex; regulation of striated muscle contraction; regulation of the force of heart contraction; skeletal muscle tissue development; ventricular cardiac muscle tissue morphogenesis	GO:0031672; GO:0031674; GO:0005509; GO:0060048; GO:0003774; GO:0016459; GO:0006942; GO:0002026; GO:0007519; GO:0055010				0.0424449831485008	0.0555227529174146	0.764461070790818	0.444766106843403	1039	1.13682782588517	1.17927280903367	0.917386436016588	3.45406713159303	3.0383379549173	3.46024803920422	2.93422184646115	123410759.47538	2.68821218248484	132343580.825758	2.58123893045619	45908117.0301467	51271340.775249	0.208198231539574	0.0555452174556295	3.74826566672255	0.000186965380962925	1143	1.13682782588517	1.34502605742475	0.960466596751681	3.45406713159303	3.0383379549173	3.60448221170008	2.67986050664431	123410759.47538	2.68821218248484	135239035.276862
AAPFTLEYR	Q9D819	Ppa1 Pp Pyp	Ppa1	IPI00110684;	AK008575;BC010468;	ENSMUST00000020286;	Inorganic pyrophosphatase (EC 3.6.1.1) (Pyrophosphate phospho-hydrolase) (PPase)		NP_080714.2;	Mm.28897;	mmu:67895;	cytoplasm; inorganic diphosphatase activity; magnesium ion binding; phosphate-containing compound metabolic process; pyrophosphatase activity	GO:0005737; GO:0004427; GO:0000287; GO:0006796; GO:0016462		PPase family	Cytoplasm.	0.2066790937993	0.110924827504252	1.86323565652044	0.0635609321301506	259	-0.388280742517546	-0.181601648718242	0.91638946938781	2.04365680073109	5.26334833780416	1.78534342329971	9.83109699664511	2056736.12699474	1.01479190024654	1984983.86327169	0.90749455470997	2026756.54633729	2187323.16681071	0.0511647648859757	0.10145659974847	0.50430198738005	0.61443882873406	285	-0.388280742517546	-0.337115977631572	0.877174305386885	2.04365680073109	5.26334833780416	1.86157871687547	5.52207204759056	2056736.12699474	1.01479190024654	1715560.91180992
AAPGGASPTIFSR	Q9D0S9	Hint2	Hint2	IPI00133034;	AF356874;AY040765;AK004497;	ENSMUST00000030192;	Histidine triad nucleotide-binding protein 2, mitochondrial (HINT-2) (EC 3.-.-.-) (HINT-3)		NP_081147.1;	Mm.25285;	mmu:68917;	apoptotic process; hydrolase activity; mitochondrion; steroid biosynthetic process	GO:0006915; GO:0016787; GO:0005739; GO:0006694		HINT family	Mitochondrion.	-0.174781160744803	0.0985776313750715	-1.77303063896706	0.0773988812517353	259	0.00284043438259601	-0.171940726362202	0.814384888773855	2.20443202530102	776.089755428985	2.37778785622676	13.8291137099062	12345427.5776933	2.3412805458309	12890971.0584547	2.33813287749284	5272938.17892807	5513361.18770015	-0.0562196821662207	0.0923676979135727	-0.608650896754239	0.54324066019926	285	0.00284043438259601	-0.0533792477836284	0.798593403074752	2.20443202530102	776.089755428985	2.3019536351873	43.1245049484065	12345427.5776933	2.3412805458309	10308336.3598082
AAPGYHMAKMIIKLITAIGDVVNHDPAVGDR	Q9WUB3	Pygm	Pygm	IPI00225275;	AF124787;BC012961;	ENSMUST00000035269;	Glycogen phosphorylase, muscle form (EC 2.4.1.1) (Myophosphorylase)		NP_035354.1;	Mm.27806;	mmu:19309;	AMP binding; cellular calcium ion homeostasis; drug binding; glycogen catabolic process; glycogen phosphorylase activity; pyridoxal phosphate binding; response to cAMP; response to hypoxia; sarcoplasmic reticulum	GO:0016208; GO:0006874; GO:0008144; GO:0005980; GO:0008184; GO:0030170; GO:0051591; GO:0001666; GO:0016529		Glycogen phosphorylase family		0.181732429131154	0.0565978096973322	3.21094455956871	0.00137104314433654	879	1.69052392545861	1.87225635458977	0.860212233373652	2.21458380098004	1.30999849669638	2.08702660396516	1.11471198847791	13233232.7783333	1.3112646084013	13928891.0010879	1.22315385143084	10091962.1360538	11387685.1916821	0.167871391540933	0.0563106585157604	2.9811654838657	0.00294346329642541	967	1.69052392545861	1.85839531699955	0.895675854540626	2.21458380098004	1.30999849669638	2.16032828543734	1.16246972088009	13233232.7783333	1.3112646084013	14744187.1988506
AAPGYHMAKMIIKLVTSIGDVVNHDPVVGDR	Q8CI94	Pygb	Pygb	IPI00229796;	BC032209;BC035283;	ENSMUST00000045441;	Glycogen phosphorylase, brain form (EC 2.4.1.1)		NP_722476.1;	Mm.222584;	mmu:110078;	axon; cytoplasm; drug binding; glycogen catabolic process; glycogen phosphorylase activity; pyridoxal phosphate binding	GO:0030424; GO:0005737; GO:0008144; GO:0005980; GO:0008184; GO:0030170		Glycogen phosphorylase family		0.141681714521737	0.0551194382739898	2.57044917289361	0.0103241011534348	859	0.61085530094717	0.752537015468904	0.828168413654957	2.57651807021083	4.21788607910217	2.66162298515238	3.53686653339428	12924636.0925258	1.88636192123536	13591082.0526284	1.70173285224477	6851620.5437722	7986613.19530871	-0.015843683641759	0.0592704731689784	-0.26731157682155	0.789287600096767	945	0.61085530094717	0.595011617305408	0.93197989661636	2.57651807021083	4.21788607910217	2.67967101762809	4.50356083762422	12924636.0925258	1.88636192123536	15129387.3119375
AAPITQYLK	O89020	Afm	Afm	IPI00130654;IPI00828902;IPI00874975;	AJ011080;AK143987;BC026681;BC100597;	ENSMUST00000113179;ENSMUST00000128740;	Afamin (Alpha-albumin) (Alpha-Alb)		NP_660128.2;	Mm.348786;	mmu:280662;	extracellular space; vitamin E binding; vitamin transport	GO:0005615; GO:0008431; GO:0051180		ALB/AFP/VDB family	Secreted.	-0.413751678559591	0.0889209648297326	-4.65302731871893	5.05962503385851e-06	279	-0.816323952249659	-1.23007563080925	0.762338469440848	1.79096690299883	2.19394138572464	1.9242171521771	1.56430800186748	2205205.36943932	1.43098691354855	2191409.49225438	1.58684466088743	1541038.11052392	1380985.51563885	0.026416558776347	0.0780803255459616	0.338325417979937	0.735349226909199	307	-0.816323952249659	-0.789907393473312	0.700550674546638	1.79096690299883	2.19394138572464	1.82650791802307	2.31230639580636	2205205.36943932	1.43098691354855	2384132.47747249
AAPLSLCALTAVDQSVLLLKPEAK	Q61838	A2m Pzp	A2m	IPI00624663;	M93264;BC057983;U06977;	ENSMUST00000112132;	Alpha-2-macroglobulin (Alpha-2-M) (Pregnancy zone protein) [Cleaved into: Alpha-2-macroglobulin 165 kDa subunit; Alpha-2-macroglobulin 35 kDa subunit]	S27001;	NP_031402.3;	Mm.260144;	mmu:11287;	endopeptidase inhibitor activity; extracellular region; extracellular space; serine-type endopeptidase inhibitor activity	GO:0004866; GO:0005576; GO:0005615; GO:0004867		Protease inhibitor I39 (alpha-2-macroglobulin) family	Secreted.	-0.283991509666319	0.0591373690961738	-4.80223442480963	1.79925456533324e-06	1039	1.41895602093713	1.13496451127081	0.977109696834222	2.01472533044359	1.41986453471123	1.9746794035465	1.73986004314396	13519649.9918681	1.67476432807576	16804274.5736609	2.2013217578643	8072568.63859863	7633720.29265012	-0.109332473008955	0.0549475635572322	-1.98976016279734	0.0468553166219342	1143	1.41895602093713	1.30962354792817	0.950132194761311	2.01472533044359	1.41986453471123	1.99459051435176	1.52302584777679	13519649.9918681	1.67476432807576	11982626.9130092
AAPSGCRSDLDSR	G5E8C3	Gprc5a mCG_22262	Gprc5a		CH466572;	ENSMUST00000050104;	0		NP_852109.2;	Mm.23575;Mm.477015;	mmu:232431;	G-protein coupled receptor activity; Golgi apparatus; integral to membrane; plasma membrane	GO:0004930; GO:0005794; GO:0016021; GO:0005886				-0.38274837627518	0.582065137140038	-0.657569663346965	0.518702429228696	19	-4.80310665482153	-5.18585503109671	1.33367877516954	1.23260052433277	0.256625682691314	1.39631154234544	0.26925387114999	109442.239885594	1.4434344786339	33433.9550622881	0.647624455045624	75820.7189211478	51625.5289648269	-1.20423894193729	0.42608124142947	-2.82631297706785	0.0101141363641104	21	-4.80310665482153	-6.00734559675882	1.02170692456983	1.23260052433277	0.256625682691314	0.607085950906698	0.101057270824279	109442.239885594	1.4434344786339	6837.69716042719
AAPSPAPAEPAAPK	Q9JLV1	Bag3 Bis MNCb-2243	Bag3	IPI00331334;	AF130471;AB041583;AK007414;AK016510;AK036675;CH466531;	ENSMUST00000033136;	BAG family molecular chaperone regulator 3 (BAG-3) (Bcl-2-associated athanogene 3) (Bcl-2-binding protein Bis)		NP_038891.4;	Mm.84073;	mmu:29810;	apoptotic process; brain development; cytosol; negative regulation of apoptotic process; plasma membrane; spinal cord development	GO:0006915; GO:0007420; GO:0005829; GO:0043066; GO:0005886; GO:0021510				0.0206182680503458	0.0927684543168971	0.222255164238414	0.824214110482999	459	0.0859909800783617	0.106609248128709	1.01939826542368	2.12592270910041	24.7226244794873	1.75849645108682	16.4947833509134	4357323.48942299	1.45007229438757	3491386.50706865	1.20205233702638	3004900.8634175	2904521.20887315	0.175609575796246	0.085149725482947	2.0623622072794	0.0396841573554433	505	0.0859909800783617	0.261600555874605	0.97922184305389	2.12592270910041	24.7226244794873	1.62185306824024	6.19973097082276	4357323.48942299	1.45007229438757	2915480.8944854
AAPVEWR	A2AAJ9	Obscn Gm878	Obscn	IPI00459500;IPI00855152;IPI00915477;	AY603754;AL645854;AL662809;AL662809;AL645854;AL662809;AL645854;BC044882;	ENSMUST00000020732;	Obscurin (EC 2.7.11.1) (Obscurin-RhoGEF) (Obscurin-myosin light chain kinase) (Obscurin-MLCK)			Mm.339542;		ATP binding; M band; Rho guanyl-nucleotide exchange factor activity; cell differentiation; multicellular organismal development; phospholipid binding; protein serine/threonine kinase activity; protein tyrosine kinase activity; regulation of Rho protein signal transduction	GO:0005524; GO:0031430; GO:0005089; GO:0030154; GO:0007275; GO:0005543; GO:0004674; GO:0004713; GO:0035023		Protein kinase superfamily, CAMK Ser/Thr protein kinase family		-0.0705735106250612	0.0431276085715716	-1.63638822004105	0.101935243593173	1779	-1.34590535781766	-1.41647886844271	0.932244934397733	1.91160912281036	1.42031466901207	1.94633331108898	1.37406448797136	3610125.01097438	2.6089249806276	3521120.18331549	2.60087772147345	1383759.60895048	1353819.9640238	0.134350443815001	0.0407509590404194	3.29686581564236	0.000995195647876952	1957	-1.34590535781766	-1.21155491400265	0.921863796416725	1.91160912281036	1.42031466901207	1.73527072062044	1.43226749408129	3610125.01097438	2.6089249806276	2042013.30829708
AAQAHEDIIHGSGK	P47199	Cryz	Cryz	IPI00134704;	S70056;BC003800;D78646;	ENSMUST00000029850;	Quinone oxidoreductase (EC 1.6.5.5) (NADPH:quinone reductase) (Zeta-crystallin)	A54932;	NP_034098.1;	Mm.374855;	mmu:12972;	Golgi apparatus; NADPH binding; NADPH:quinone reductase activity; cytosol; mRNA 3'-UTR binding; protein homotetramerization; xenobiotic catabolic process; zinc ion binding	GO:0005794; GO:0070402; GO:0003960; GO:0005829; GO:0003730; GO:0051289; GO:0042178; GO:0008270		Zinc-containing alcohol dehydrogenase family, Quinone oxidoreductase subfamily	Cytoplasm.	0.0650111578606834	0.0778009891457747	0.835608371750555	0.405049875624405	119	-0.239572057173879	-0.174560899313197	0.436656968603411	0.874582645999717	3.65060373199097	0.993228913345134	5.68987051082434	885281.866016963	0.640640170513676	944533.868816521	0.602928269176634	1381870.67680618	1566577.51361764	0.0572846576487621	0.0698653448692312	0.81992950519293	0.41374564533281	131	-0.239572057173879	-0.182287399525116	0.410365984546152	0.874582645999717	3.65060373199097	0.805278241528992	4.41762976281878	885281.866016963	0.640640170513676	670490.770327235
AAQASAAPK	P56480	Atp5b	Atp5b	IPI00468481;	AF030559;AK003460;AK010314;AK084009;AK145684;AK148891;AK150599;AK151081;AK151600;AK152788;AK152976;AK153099;AK159444;AK159737;AK159978;AK160199;AK160608;AK164383;AK166525;AK166603;AK166979;AK167119;AK167160;AK167728;AK167764;AK168692;AK168941;AK169184;BC018392;BC037127;BC046616;DQ403100;	ENSMUST00000026459;	ATP synthase subunit beta, mitochondrial (EC 3.6.3.14)		NP_058054.2;	Mm.238973;	mmu:11947;	ADP biosynthetic process; ATP binding; ATP hydrolysis coupled proton transport; ATP synthesis coupled proton transport; angiogenesis; calcium ion binding; cell surface; eukaryotic cell surface binding; hydrogen ion transporting ATP synthase activity, rotational mechanism; hydrogen-exporting ATPase activity, phosphorylative mechanism; lipid metabolic process; lipoprotein particle receptor activity…	GO:0006172; GO:0005524; GO:0015991; GO:0015986; GO:0001525; GO:0005509; GO:0009986; GO:0043499; GO:0046933; GO:0008553; GO:0006629; GO:0030228; GO:0042645; GO:0005753; GO:0000275; GO:0006933; GO:0005886; GO:0046961; GO:0051453		ATPase alpha/beta chains family	Mitochondrion. Mitochondrion inner membrane.	0.0516864201299178	0.0581020373942056	0.889580167029948	0.37384429819654	1399	1.34979251989526	1.40147894002518	1.11383287812353	4.02087621335675	2.97888464641126	3.85251985044889	2.7488959986653	145279579.860192	2.41661994575645	139278895.600717	2.33297146497026	60116850.4444816	59700213.9511779	0.126677738038928	0.0531150915779478	2.38496695149296	0.0172011017139297	1539	1.34979251989526	1.47647025793418	1.06561635390831	4.02087621335675	2.97888464641126	3.94574305314081	2.67241621152703	145279579.860192	2.41661994575645	147226806.883191
AAQDFFSTCR	P70697	Urod	Urod	IPI00111958;	U34691;AK172426;AL671671;BC008109;	ENSMUST00000030446;	Uroporphyrinogen decarboxylase (UPD) (URO-D) (EC 4.1.1.37)	T10088;	NP_033504.2;	Mm.46484;	mmu:22275;	cellular response to arsenic-containing substance; cytosol; ferrous iron binding; heme biosynthetic process; liver development; microtubule cytoskeleton; nucleus; protoporphyrinogen IX biosynthetic process; response to amine stimulus; response to estradiol stimulus; response to ethanol; response to fungicide; response to iron ion; response to mercury ion; response to methylmercury; uroporphyrinog…	GO:0071243; GO:0005829; GO:0008198; GO:0006783; GO:0001889; GO:0015630; GO:0005634; GO:0006782; GO:0014075; GO:0032355; GO:0045471; GO:0060992; GO:0010039; GO:0046689; GO:0051597; GO:0046502; GO:0004853	Porphyrin metabolism; protoporphyrin-IX biosynthesis; coproporphyrinogen-III from 5-aminolevulinate: step 4/4.	Uroporphyrinogen decarboxylase family	Cytoplasm.	-0.297940382236922	0.176146573550027	-1.691434447076	0.107091241787635	19	-0.0670568484104296	-0.364997230647352	0.403602503350052	0.366925720644397	5.47186050854319	0.431597868795883	1.18246888621705	450422.557197021	0.340088215066228	463491.604065919	0.389765631159095	1324428.59600209	1189154.62784026	-0.537559611318815	0.166788249322589	-3.22300649777256	0.00407964753175944	21	-0.0670568484104296	-0.604616459729244	0.399944171909707	0.366925720644397	5.47186050854319	0.432858693191462	0.715922774225006	450422.557197021	0.340088215066228	269758.369333622
AAQDRDQIYR	P62996	Tra2b Sfrs10 Silg41	Tra2b	IPI00139259;IPI00457594;	X80232;AK049573;AK077418;AK080378;BC061177;	ENSMUST00000161286;ENSMUST00000162413;	Transformer-2 protein homolog beta (TRA-2 beta) (TRA2-beta) (Silica-induced gene 41 protein) (SIG-41) (Splicing factor, arginine/serine-rich 10) (Transformer-2 protein homolog B)	S68798;	NP_033212.1;	Mm.210352;Mm.389440;Mm.442193;	mmu:20462;	mRNA binding; mRNA splicing, via spliceosome; nucleotide binding; nucleus; positive regulation of mRNA splicing, via spliceosome; regulation of alternative mRNA splicing, via spliceosome	GO:0003729; GO:0000398; GO:0000166; GO:0005634; GO:0048026; GO:0000381		Splicing factor SR family	Nucleus.	0.00475921865364719	0.386909830771222	0.0123005886000899	0.990216808564722	79	-0.610066563455118	-0.605307344801471	1.77304358663168	1.86435267840224	3.05598239615601	1.36777786115694	2.25964193711468	3448928.33522825	1.8878292467814	2645713.34209666	1.72011729025804	1826928.11921863	1538100.54528303	0.423309968959828	0.338128027864222	1.25192215396534	0.213953600054971	87	-0.610066563455118	-0.18675659449529	1.6216050549468	1.86435267840224	3.05598239615601	1.2808073397696	6.85816392845982	3448928.33522825	1.8878292467814	3812838.4713607
AAQEEYIK	P05064	Aldoa Aldo1	Aldoa	IPI00221402;	X03797;BC043026;BC050896;J05517;Y00516;	ENSMUST00000032934;ENSMUST00000106348;	Fructose-bisphosphate aldolase A (EC 4.1.2.13) (Aldolase 1) (Muscle-type aldolase)	ADMSA;	NP_001170779.1;NP_031464.1;	Mm.275831;	mmu:11674;	Z disc; flagellum; fructose-bisphosphate aldolase activity; glycolysis; membrane; protein complex; protein homotetramerization	GO:0030018; GO:0019861; GO:0004332; GO:0006096; GO:0016020; GO:0043234; GO:0051289	Carbohydrate degradation; glycolysis; D-glyceraldehyde 3-phosphate and glycerone phosphate from D-glucose: step 4/4.	Class I fructose-bisphosphate aldolase family		-0.181134314611748	0.0632148342327126	-2.86537672383887	0.00427728765891595	779	2.12601977607154	1.9448854614598	0.904546627284877	2.59274660163244	1.21953080155412	2.78620850216107	1.43258230747932	39178989.8865487	1.7940406670799	40925596.3550372	1.81060223302665	21838406.7905881	22603306.0207956	-0.0478702850605024	0.0645714321119248	-0.741353931526972	0.458681964848947	857	2.12601977607154	2.07814949101104	0.966955848391159	2.59274660163244	1.21953080155412	2.90700714182108	1.39884409393801	39178989.8865487	1.7940406670799	39231915.3625374
AAQEKMIQQEHER	Q8CFC7	Clasrp Clasp Sfrs16 Srsf16 Swap2	Clasrp	IPI00131244;IPI00172022;IPI00229282;	AF042799;AK009334;BC051916;AB080582;AB080583;	ENSMUST00000086041;	CLK4-associating serine/arginine rich protein (Clk4-associating SR-related protein) (Serine/arginine-rich splicing factor 16) (Splicing factor, arginine/serine-rich 16) (Suppressor of white-apricot homolog 2)		NP_057889.3;	Mm.20913;	mmu:53609;	RNA splicing; mRNA processing; nucleoplasm	GO:0008380; GO:0006397; GO:0005654		Splicing factor SR family	Nucleus. Nucleus › nucleoplasm.	-0.0905713221020967	0.506069844361813	-0.178970004063991	0.858887792754846	39	-4.46044579458102	-4.55101711668312	1.63985371829627	2.35727877863063	0.528485018581434	2.66976755841083	0.586630964015494	261009.619532338	1.49488816559468	231250.489133135	1.15830821413148	174601.435438153	199645.039473824	0.122088267781487	0.364019891328192	0.335389001232944	0.738962513167318	43	-4.46044579458102	-4.33835752679953	1.2344515117046	2.35727877863063	0.528485018581434	2.0310541222611	0.468161996726774	261009.619532338	1.49488816559468	170574.320249952
AAQFVDLLGYFSLKTAQTEK	A2AN08	Ubr4 Kiaa0462 Zubr1	Ubr4	IPI00378681;IPI00606977;IPI00648709;IPI00845523;IPI00845583;	AK044277;AK080556;AK082231;AK083644;AK086097;AL807833;AL807833;AL807833;AL807833;AB093242;BC040468;BC051096;BC057625;BC059890;BC094329;	ENSMUST00000097822;ENSMUST00000129779;ENSMUST00000147999;ENSMUST00000165860;	E3 ubiquitin-protein ligase UBR4 (EC 6.3.2.-) (N-recognin-4) (Zinc finger UBR1-type protein 1) (p600)		NP_001153791.1;	Mm.271956;	mmu:69116;	cytoplasm; cytoskeleton; integral to membrane; metal ion binding; nucleus; ubiquitin-protein ligase activity; zinc ion binding	GO:0005737; GO:0005856; GO:0016021; GO:0046872; GO:0005634; GO:0004842; GO:0008270	Protein modification; protein ubiquitination.	UBR4 family	Membrane; Multi-pass membrane protein. Cytoplasm. Cytoplasm › cytoskeleton. Nucleus.	-0.130878586401753	0.195832551532518	-0.668318853926692	0.505224333404756	119	-1.58369657550776	-1.71457516190951	1.09910746951865	3.15109674882111	1.98970989617175	3.22740758898166	1.88233660482245	6071954.41949678	1.8610005351525	6265500.18261977	1.86470999366969	3262736.5252204	3360040.00830686	0.0437922759806614	0.19334705788322	0.22649569359939	0.82116894629335	131	-1.58369657550776	-1.5399042995271	1.13565682550996	3.15109674882111	1.98970989617175	3.26490438594609	2.12019953899	6071954.41949678	1.8610005351525	7445173.04951048
AAQGNVDAPNVGSSTAQVPR	O88676	Mmp23 Cammp	Mmp23	IPI00133157;IPI00808280;	AF085742;AK146510;BC107357;BC107358;	ENSMUST00000030937;	Matrix metalloproteinase-23 (MMP-23) (EC 3.4.24.-) (CAMP metalloproteinase) (CA-MMP) [Cleaved into: Matrix metalloproteinase-23, soluble form]		NP_036115.1;	Mm.29373;	mmu:26561;	endoplasmic reticulum membrane; extracellular matrix; integral to membrane; metal ion binding; metalloendopeptidase activity; proteolysis; reproduction; zinc ion binding	GO:0005789; GO:0031012; GO:0016021; GO:0046872; GO:0004222; GO:0006508; GO:0000003; GO:0008270		Peptidase M10A family	Endoplasmic reticulum membrane; Single-pass type II membrane protein. Membrane; Single-pass type II membrane protein.	-1.10646516858964	0.408123456234472	-2.71110408305953	0.013853239351508	19	-0.128870708455892	-1.23533587704554	0.935128315540732	1.03388717592663	8.02267007231122	0.637615873974317	0.516147782819403	746314.683255776	0.537564256300753	186426.431200088	0.296937439118268	1388326.46424734	627830.669496127	0.394143007658695	0.4517253119758	0.872528054570937	0.392787779016747	21	-0.128870708455892	0.265272299202801	1.08319924552591	1.03388717592663	8.02267007231122	1.12513993714068	4.24145280348518	746314.683255776	0.537564256300753	866444.227646118
AAQIGAHTLSGACLDPAAFK	Q921G7	Etfdh	Etfdh	IPI00121322;	AK002483;AK075673;AK141684;AK152624;AK169686;BC012522;	ENSMUST00000029386;	Electron transfer flavoprotein-ubiquinone oxidoreductase, mitochondrial (ETF-QO) (ETF-ubiquinone oxidoreductase) (EC 1.5.5.1) (Electron-transferring-flavoprotein dehydrogenase) (ETF dehydrogenase)		NP_080070.2;	Mm.28336;	mmu:66841;	4 iron, 4 sulfur cluster binding; electron carrier activity; electron transport chain; electron-transferring-flavoprotein dehydrogenase activity; fatty acid beta-oxidation using acyl-CoA dehydrogenase; integral to mitochondrial inner membrane; metal ion binding; mitochondrial electron transfer flavoprotein complex; mitochondrial inner membrane; oxidoreductase activity, oxidizing metal ions with f…	GO:0051539; GO:0009055; GO:0022900; GO:0004174; GO:0033539; GO:0031305; GO:0046872; GO:0017133; GO:0005743; GO:0043783; GO:0006979; GO:0048039		ETF-QO/FixC family	Mitochondrion inner membrane.	-0.265354770145644	0.0607461437966807	-4.36825703757912	1.42181100656614e-05	779	0.93815563493678	0.672800864791139	0.869221918538469	2.21863925399942	2.36489466286575	2.31537350084771	3.44139495356696	10264558.5803292	1.53662038993406	9107402.17968318	1.49327621493782	6679957.29301083	6098940.09465784	-0.0259827829235111	0.0599232492008485	-0.433601035825393	0.664687303782207	857	0.93815563493678	0.912172852013269	0.897349406296668	2.21863925399942	2.36489466286575	2.28205605836154	2.50178028574824	10264558.5803292	1.53662038993406	8733826.22061921
AAQLDGLEAR	Q61292	Lamb2 Lams	Lamb2	IPI00119065;	U43541;U42624;CH466560;CH466560;BC026051;X75928;	ENSMUST00000065014;	Laminin subunit beta-2 (Laminin-11 subunit beta) (Laminin-14 subunit beta) (Laminin-15 subunit beta) (Laminin-3 subunit beta) (Laminin-4 subunit beta) (Laminin-7 subunit beta) (Laminin-9 subunit beta) (S-laminin subunit beta) (S-LAM beta)	I48749;	NP_032509.2;	Mm.425599;	mmu:16779;	Schwann cell development; astrocyte development; axon extension involved in regeneration; axon guidance; cell adhesion; laminin-3 complex; metanephric glomerular basement membrane development; metanephric glomerular visceral epithelial cell development; neuromuscular junction development; retina development in camera-type eye; synapse; visual perception	GO:0014044; GO:0014002; GO:0048677; GO:0007411; GO:0007155; GO:0005608; GO:0072274; GO:0072249; GO:0007528; GO:0060041; GO:0045202; GO:0007601			Secreted › extracellular space › extracellular matrix › basement membrane.	-0.0231463408233405	0.0662163801690245	-0.349556118354053	0.726771435557654	739	-0.619747434366401	-0.642893775189744	0.922881519357873	2.04984137658217	3.30754314243806	1.97989393768571	3.07965952400358	5919280.14724807	2.36576701442227	5792470.59987956	2.26630441311464	2502055.40577865	2555910.21504425	0.0218050683470106	0.0610587494367687	0.357116196256059	0.721097494603254	813	-0.619747434366401	-0.597942366019391	0.890599997368006	2.04984137658217	3.30754314243806	1.78901925227639	2.99195934916974	5919280.14724807	2.36576701442227	4105485.31697923
AAQLGFGGVYVR	Q9D7B6	Acad8	Acad8	IPI00274222;	AK009379;AK019502;AK029897;AK051091;AK077335;BC037644;	ENSMUST00000060513;	Isobutyryl-CoA dehydrogenase, mitochondrial (EC 1.3.99.-) (Acyl-CoA dehydrogenase family member 8) (ACAD-8)		NP_080138.2;	Mm.289244;	mmu:66948;	acyl-CoA dehydrogenase activity; flavin adenine dinucleotide binding; mitochondrion; valine catabolic process	GO:0003995; GO:0050660; GO:0005739; GO:0006574	Amino-acid degradation; L-valine degradation.	Acyl-CoA dehydrogenase family	Mitochondrion.	-0.0752835909040804	0.0683116274483941	-1.10206115292676	0.271265864800792	319	0.386210756877668	0.310927165973588	0.626086407255778	1.39153482774412	3.60304523621771	1.35355805918343	4.35329622918317	2954541.16759595	1.06047902404008	2944282.02595019	1.07226349445148	2786043.9486489	2745856.81708425	0.05453240430449	0.0712008878178453	0.765895004624119	0.444253507960217	351	0.386210756877668	0.440743161182159	0.68293492456935	1.39153482774412	3.60304523621771	1.31207761575963	2.97696647689413	2954541.16759595	1.06047902404008	2903755.55503344
AAQNSGEAEYIEK	P02469	Lamb1 Lamb-1 Lamb1-1	Lamb1	IPI00988644;	M15525;X05212;	ENSMUST00000169088;	Laminin subunit beta-1 (Laminin B1 chain) (Laminin-1 subunit beta) (Laminin-10 subunit beta) (Laminin-12 subunit beta) (Laminin-2 subunit beta) (Laminin-6 subunit beta) (Laminin-8 subunit beta)	MMMSB1;		Mm.172674;		cell adhesion; cell migration; embryo implantation; extracellular matrix structural constituent; glycosphingolipid binding; integrin binding; laminin-1 complex; laminin-10 complex; laminin-2 complex; laminin-8 complex; learning or memory; negative regulation of cell adhesion; neuron projection development; odontogenesis; perinuclear region of cytoplasm; positive regulation of cell migration	GO:0007155; GO:0016477; GO:0007566; GO:0005201; GO:0043208; GO:0005178; GO:0005606; GO:0043259; GO:0005607; GO:0043257; GO:0007611; GO:0007162; GO:0031175; GO:0042476; GO:0048471; GO:0030335			Secreted › extracellular space › extracellular matrix › basement membrane.	0.132017270049311	0.0451653141866625	2.9229791140985	0.00353674913336656	1119	-0.509798063726031	-0.377780793676718	0.774423816808665	2.03241249001522	3.98670107760051	2.0741800260494	5.49043270798029	3596380.74396956	1.80795741869506	4569403.10218587	1.94183872019208	1989195.49032595	2353132.13948782	0.27742589109964	0.0437145149239336	6.34631063806566	3.09335011942002e-10	1231	-0.509798063726031	-0.232372172626389	0.784428925041147	2.03241249001522	3.98670107760051	2.10649292986296	9.06516863036698	3596380.74396956	1.80795741869506	5207961.51223728
AAQSLIQCAVAK	A1A547	Pglyrp3 Gm420 Pgrpia	Pglyrp3	IPI00411013;	AY518698;BC128291;	ENSMUST00000047660;	Peptidoglycan recognition protein 3 (Peptidoglycan recognition protein I-alpha) (PGLYRPIalpha) (PGRP-I-alpha) (Peptidoglycan recognition protein intermediate alpha)		NP_997130.2;	Mm.297406;	mmu:242100;	N-acetylmuramoyl-L-alanine amidase activity; defense response to Gram-positive bacterium; detection of bacterium; extracellular region; growth of symbiont in host; innate immune response; negative regulation of interferon-gamma production; negative regulation of natural killer cell differentiation involved in immune response; peptidoglycan binding; peptidoglycan catabolic process; peptidoglycan r…	GO:0008745; GO:0050830; GO:0016045; GO:0005576; GO:0044117; GO:0045087; GO:0032689; GO:0032827; GO:0042834; GO:0009253; GO:0016019; GO:0008270		N-acetylmuramoyl-L-alanine amidase 2 family	Secreted.	1.29807718389072	0.753856108041981	1.72191638436447	0.101325312090912	19	2.12681656297891	3.42489374686963	1.72730133910359	2.10531306163159	0.989889348370879	0.202172359636316	0.059030257455754	8625660.42800423	0.801425104043644	4408345.2548477	0.277857245616605	10762902.7147801	15865504.047105	-0.440902150406343	1.11353821066358	-0.395947032786239	0.696138222838044	21	2.12681656297891	1.68591441257257	2.67017082655682	2.10531306163159	0.989889348370879	3.23162525038368	1.91683826075873	8625660.42800423	0.801425104043644	10302375.7102909
AAQSPQQHSSGDPTEEESPV	P53986	Slc16a1 Mct1	Slc16a1	IPI00137194;	X82438;AF058055;BC014777;	ENSMUST00000046212;	Monocarboxylate transporter 1 (MCT 1) (Solute carrier family 16 member 1)		NP_033222.1;	Mm.9086;	mmu:20501;	integral to membrane; mitochondrion; plasma membrane; secondary active monocarboxylate transmembrane transporter activity; symporter activity	GO:0016021; GO:0005739; GO:0005886; GO:0015355; GO:0015293		Major facilitator superfamily, Monocarboxylate porter (TC 2.A.1.13) family	Cell membrane; Multi-pass membrane protein.	-0.270660703246828	0.124527102984652	-2.17350839102221	0.0327371621770826	79	1.02964682033072	0.758986117083891	0.570654875500729	1.57896000493488	1.53349670368304	1.54956234185232	2.04162145653718	7111223.66574861	1.31115384110066	6381174.85258205	1.34711959819683	5423637.90032377	4736902.98999693	0.310070146330049	0.0849371495886445	3.65058337643465	0.000445878119283717	87	1.02964682033072	1.33971696666077	0.407344259497549	1.57896000493488	1.53349670368304	1.49396715813334	1.11513640217384	7111223.66574861	1.31115384110066	8145177.43511685
AAQSQLSQGDLVVAIDGVNTDTMTHLEAQNK	Q9JKS4	Ldb3 Kiaa0613	Ldb3	IPI00123369;IPI00323030;IPI00403041;IPI00621572;IPI00625287;IPI00656173;	AF114378;AF114379;AJ005621;AF228057;AF228058;AY206011;AY206012;AY206013;AY206015;AK172980;AK004020;AK137181;AK142292;BC099596;BC138793;BC145420;	ENSMUST00000022327;ENSMUST00000022328;ENSMUST00000022330;ENSMUST00000090040;	LIM domain-binding protein 3 (Protein cypher) (Protein oracle) (Z-band alternatively spliced PDZ-motif protein)		NP_001034160.1;NP_001034161.1;NP_001034162.1;NP_001034163.1;NP_001034164.1;NP_001034165.1;NP_036048.3;	Mm.29733;	mmu:24131;	Z disc; cytoskeleton; metal ion binding; perinuclear region of cytoplasm; protein kinase C binding; pseudopodium; zinc ion binding	GO:0030018; GO:0005856; GO:0046872; GO:0048471; GO:0005080; GO:0031143; GO:0008270			Cytoplasm › perinuclear region. Cell projection › pseudopodium. Cytoplasm › cytoskeleton. Cytoplasm › myofibril › sarcomere › Z line.	0.0511237508306721	0.0588777388080435	0.868303570511576	0.385554152586682	639	0.847919192031923	0.89904294286259	0.76314271624703	2.80279699417156	3.30550012372645	2.82939328057183	3.14711694589685	7473198.21521275	1.15526317991838	7777764.71169388	1.10043778836794	6468827.48893697	7067882.2500535	0.0367574172125144	0.0592237302716254	0.620653529318891	0.535028768139594	703	0.847919192031923	0.884676609244442	0.803349763067537	2.80279699417156	3.30550012372645	2.80489664607603	3.17053329630988	7473198.21521275	1.15526317991838	9920992.23918775
AAQSSVTASPQTEEFFDLIASSQSR	Q6IR34	Gpsm1 Ags3 C10a	Gpsm1	IPI00153257;IPI00226536;IPI00405083;IPI00751129;IPI00798498;	AK048691;AK084631;AL732541;AL732541;AL732541;CH466542;CH466542;BC026486;BC071197;L23316;	ENSMUST00000066889;ENSMUST00000066936;ENSMUST00000078616;	G-protein-signaling modulator 1 (Activator of G-protein signaling 3)		NP_001186075.1;NP_001186076.1;NP_700459.2;	Mm.266611;	mmu:67839;	GDP-dissociation inhibitor activity; Golgi membrane; cell differentiation; cytosol; endoplasmic reticulum membrane; nervous system development; nucleus; plasma membrane; regulation of G-protein coupled receptor protein signaling pathway; signal transduction	GO:0005092; GO:0000139; GO:0030154; GO:0005829; GO:0005789; GO:0007399; GO:0005634; GO:0005886; GO:0008277; GO:0007165		GPSM family	Cytoplasm › cytosol. Endoplasmic reticulum membrane; Peripheral membrane protein; Cytoplasmic side. Golgi apparatus membrane; Peripheral membrane protein; Cytoplasmic side. Cell membrane; Peripheral membrane protein; Cytoplasmic side.	-0.139255046968755	0.187820160344809	-0.741427580048404	0.461375315588125	59	-1.37360358329616	-1.51285863026491	0.745388153214959	1.79614799156501	1.30761743301142	1.37236060375907	0.907130763116157	1395583.94671265	1.2783340935116	633057.19525795	0.859777198431769	1091720.8214943	736303.773131742	-0.130733393086731	0.192189205254781	-0.680232757679707	0.498772858649799	65	-1.37360358329616	-1.50433697638289	0.798221719282311	1.79614799156501	1.30761743301142	1.63066490937844	1.0839758212281	1395583.94671265	1.2783340935116	3046670.7253747
AAQTAEDAMQIMEQMTK	Q922J3	Clip1 Kiaa4046 Rsn	Clip1	IPI00123063;IPI00761270;	AK220172;BC007191;	ENSMUST00000111564;ENSMUST00000111566;	CAP-Gly domain-containing linker protein 1 (Restin)		NP_062739.2;	Mm.241109;Mm.441802;	mmu:56430;	centrosome; cytoplasmic microtubule; cytoplasmic vesicle membrane; macropinosome; metal ion binding; microtubule binding; microtubule bundle formation; microtubule plus end; nucleic acid binding; positive regulation of microtubule polymerization; ruffle; transport; zinc ion binding	GO:0005813; GO:0005881; GO:0030659; GO:0044354; GO:0046872; GO:0008017; GO:0001578; GO:0035371; GO:0003676; GO:0031116; GO:0001726; GO:0006810; GO:0008270			Cytoplasm. Cytoplasm › cytoskeleton. Cytoplasmic vesicle membrane; Peripheral membrane protein; Cytoplasmic side. Cell projection › ruffle.	0.166747158988706	0.0821272706262655	2.0303506705771	0.0430187402125734	379	-1.36902621380692	-1.20227905481822	0.820245472957245	1.40397405181492	1.0255275155841	1.21825874126166	1.01329116262935	903201.647396515	1.15698233282776	1644909.14559458	1.77913411802685	780652.92940906	924556.012347661	0.133433159444956	0.0821419059531992	1.62442249052487	0.105041249726841	417	-1.36902621380692	-1.23559305436197	0.85856958306444	1.40397405181492	1.0255275155841	1.40087412831328	1.13376659359473	903201.647396515	1.15698233282776	2793078.20767085
AAQTSDSEKIHLDEK	Q93092	Taldo1 Tal Taldo	Taldo1	IPI00124692;	U67611;U63158;U63159;BC004754;BC094277;	ENSMUST00000026576;	Transaldolase (EC 2.2.1.2)		NP_035658.1;	Mm.29182;	mmu:21351;	cytosol; fructose 6-phosphate metabolic process; glyceraldehyde-3-phosphate metabolic process; monosaccharide binding; pentose-phosphate shunt, non-oxidative branch; sedoheptulose-7-phosphate:D-glyceraldehyde-3-phosphate glyceronetransferase activity	GO:0005829; GO:0006002; GO:0019682; GO:0048029; GO:0009052; GO:0004801	Carbohydrate degradation; pentose phosphate pathway; D-glyceraldehyde 3-phosphate and beta-D-fructose 6-phosphate from D-ribose 5-phosphate and D-xylulose 5-phosphate (non-oxidative stage): step 2/3.	Transaldolase family, Type 1 subfamily	Cytoplasm.	0.171393372457599	0.0924491956381549	1.85391956386977	0.0653961285668528	179	0.338899792884415	0.510293165342015	0.635483155424439	1.18674797404004	3.50176659578188	1.01563711711865	1.99030123485573	1939721.67546651	0.827929079647781	1928354.22058926	0.723806730719052	2342859.70036433	2664183.8749877	0.0163215048417623	0.0956534933187308	0.170631560599432	0.864688598485389	197	0.338899792884415	0.355221297726178	0.688107057859428	1.18674797404004	3.50176659578188	1.13300485334306	3.18957466963716	1939721.67546651	0.827929079647781	1617505.6606061
AAQTSVAYGCIK	Q9D0I9	Rars	Rars	IPI00315488;	AK011383;AK076160;AK149856;AK151966;AK152108;AK166097;AK168194;AL596084;CH466658;BC020132;	ENSMUST00000018992;	Arginine--tRNA ligase, cytoplasmic (EC 6.1.1.19) (Arginyl-tRNA synthetase) (ArgRS)		NP_080212.2;	Mm.284906;	mmu:104458;	ATP binding; aminoacyl-tRNA synthetase multienzyme complex; arginine binding; arginine-tRNA ligase activity; arginyl-tRNA aminoacylation; mitochondrion; nucleus; tRNA binding	GO:0005524; GO:0017101; GO:0034618; GO:0004814; GO:0006420; GO:0005739; GO:0005634; GO:0000049		Class-I aminoacyl-tRNA synthetase family	Cytoplasm.	-0.0532384023796238	0.0922895083737722	-0.576862996864263	0.564965069477777	139	0.312043604714603	0.258805202334979	0.559475411281244	2.67561481420908	8.57449014747861	2.72316866293268	10.5220785299671	37092056.8373915	2.65303804277899	40394175.9179229	2.4232020620853	13980974.3544192	16669751.3797762	-0.170513416276459	0.0892238481554603	-1.91107444703979	0.0578649895915089	153	0.312043604714603	0.141530188438145	0.566061857888926	2.67561481420908	8.57449014747861	2.65636278426253	18.7688776053844	37092056.8373915	2.65303804277899	31859331.571788
AARAFGEYLSQSHPENR	Q99NF2	Nelf Jac	Nelf	IPI00119317;IPI00272207;IPI00404118;IPI00460021;IPI00607923;	AF266508;AJ278902;AK004986;AK019560;AK041478;AK045384;AK053402;AL732585;AL732585;BC006642;	ENSMUST00000006646;ENSMUST00000100334;ENSMUST00000102931;	Nasal embryonic luteinizing hormone-releasing hormone factor (Nasal embryonic LHRH factor) (Juxtasynaptic attractor of caldendrin on dendritic boutons protein) (Jacob protein)		NP_001034475.1;NP_001034476.1;NP_001171125.1;NP_001171126.1;NP_064672.2;	Mm.42956;	mmu:56876;	nucleus; plasma membrane	GO:0005634; GO:0005886			Cell membrane; Peripheral membrane protein. Nucleus.	-0.241454949177936	0.251276330590239	-0.960914020874017	0.348665625212804	19	-2.68745102047172	-2.92890596964965	0.575746402640259	0.439343611415219	0.163479672026954	0.719611033093376	0.245692774213388	63227.4991230738	0.296566570866521	112135.205110849	0.51566901116137	213198.33499215	217455.776251325	-0.754709973368155	0.394634225968387	-1.91242908928181	0.0695585408423898	21	-2.68745102047172	-3.44216099383987	0.946299630538653	0.439343611415219	0.163479672026954	1.34035371915997	0.389393093919397	63227.4991230738	0.296566570866521	72836.0566842294
AASAYAVGDVK	Q8K1M3	Prkar2a mCG_16488	Prkar2a	IPI00169788;	BC075623;BC080276;AF533977;AK132728;CH466560;	ENSMUST00000035220;	0		NP_032950.1;	Mm.253102;Mm.486392;	mmu:19087;	T-tubule; cAMP binding; cAMP-dependent protein kinase complex; cAMP-dependent protein kinase regulator activity; centrosome; kinase activity; perinuclear region of cytoplasm; protein heterooligomerization; signal transduction	GO:0030315; GO:0030552; GO:0005952; GO:0008603; GO:0005813; GO:0016301; GO:0048471; GO:0051291; GO:0007165				0.0588216080221547	0.0955127776778717	0.615850668907753	0.54530077545386	19	1.21902432539432	1.27784593341648	0.218847266772168	0.190710711146392	0.156445369607126	0.245518358146868	0.192134553725459	1181386.54435891	0.364482374411847	916470.313574914	0.259903671667735	3241272.08144229	3526192.25305345	-0.0709682857136394	0.128773190721077	-0.55111071890233	0.587374044015826	21	1.21902432539432	1.14805603968068	0.30878726370885	0.190710711146392	0.156445369607126	0.412556778671076	0.359352474453968	1181386.54435891	0.364482374411847	421790.844369461
AASEWLLR	Q9CRA7	Atp5s Atpw	Atp5s	IPI00133531;	AK003725;BC027442;	ENSMUST00000021372;	ATP synthase subunit s, mitochondrial (ATP synthase-coupling factor B) (Mitochondrial ATP synthase regulatory component factor B)		NP_080812.1;	Mm.27844;	mmu:68055;	ATP biosynthetic process; metal ion binding; mitochondrial inner membrane; mitochondrion; proton transport; proton-transporting ATP synthase complex, coupling factor F(o)	GO:0006754; GO:0046872; GO:0005743; GO:0005739; GO:0015992; GO:0045263		ATP synthase subunit s family	Mitochondrion. Mitochondrion inner membrane.	0.0499966138629859	0.10978369589536	0.455410190513536	0.651339595971882	39	-0.662600489159102	-0.612603875296116	0.355739833005345	0.8656749339543	1.30648097627111	0.854179941220296	1.39434302600095	795712.642275056	0.74418533501906	612745.487764081	0.555048251445387	1069239.88532329	1103949.9469973	0.138370589252612	0.0865818630416673	1.59814751486719	0.11733356910177	43	-0.662600489159102	-0.52422989990649	0.293613382851173	0.8656749339543	1.30648097627111	0.825920019439118	1.5754920113989	795712.642275056	0.74418533501906	754770.954172839
AASEYENEIR	Q3URD3	Slmap Kiaa1601 Slap	Slmap	IPI00121581;IPI00623400;IPI00624363;IPI00755791;IPI00798436;	AF304451;AK129403;AK141597;AK146685;AK164911;AK166396;BC021457;	ENSMUST00000038522;ENSMUST00000102956;ENSMUST00000139075;	Sarcolemmal membrane-associated protein (Sarcolemmal-associated protein)		NP_114397.3;	Mm.36769;	mmu:83997;	M band; Z disc; extracellular space; integral to membrane; microtubule organizing center; sarcolemma	GO:0031430; GO:0030018; GO:0005615; GO:0016021; GO:0005815; GO:0042383		SLMAP family	Cell membrane › sarcolemma; Single-pass type IV membrane protein. Cytoplasm › myofibril › sarcomere › M line. Cytoplasm › myofibril › sarcomere › Z line. Cytoplasm › cytoskeleton › centrosome.	-0.467877841036114	0.151979175985414	-3.0785654547898	0.00285975033869722	79	0.102031723548596	-0.365846117487517	0.696456078010174	3.04645675868796	29.857936852718	3.01620784357373	8.2444713758009	17512125.0387368	1.8613583185746	14105658.0965958	1.82497987068423	9408250.34276441	7729212.97554214	-0.292882429459435	0.185056516565769	-1.58266477125297	0.117126608186779	87	0.102031723548596	-0.190850705910839	0.887499875740559	3.04645675868796	29.857936852718	2.82532222603519	14.803834298392	17512125.0387368	1.8613583185746	17333635.7916039
AASGFNATEDAQTLR	P97429	Anxa4 Anx4	Anxa4	IPI00353727;	U72941;AK132293;AK150486;AK150614;AK151054;AK151236;AK167338;AK168390;AK168487;AK168917;AK170447;CH466523;	ENSMUST00000001187;ENSMUST00000113675;	Annexin A4 (Annexin IV) (Annexin-4)		NP_038499.2;	Mm.259702;	mmu:11746;	apical plasma membrane; calcium ion binding; calcium-dependent phospholipid binding; kidney development	GO:0016324; GO:0005509; GO:0005544; GO:0001822		Annexin family		0.0292515409050788	0.0724434947817297	0.403784232017145	0.686641934639623	319	-0.285168132314657	-0.255916591409578	0.66395559688883	1.42787479583818	5.00713310512078	1.21351827951252	4.74185074452777	2787829.77725523	1.4518837042881	1958077.54221105	1.10840504552066	1920146.7507497	1766572.20221445	-0.172061937775246	0.0782518787758738	-2.19882181063103	0.0285425542241357	351	-0.285168132314657	-0.457230070089904	0.750565653983562	1.42787479583818	5.00713310512078	1.44243220919191	3.15471860568638	2787829.77725523	1.4518837042881	2127629.01376954
AASGTKEDPNLVPSISNK	P19536	Cox5b	Cox5b	IPI00785410;	X53157;M77040;		Cytochrome c oxidase subunit 5B, mitochondrial (Cytochrome c oxidase polypeptide Vb)	A39425;		Mm.180182;Mm.288128;		cytochrome-c oxidase activity; metal ion binding; mitochondrial inner membrane	GO:0004129; GO:0046872; GO:0005743		Cytochrome c oxidase subunit 5B family	Mitochondrion inner membrane.	0.0127166034995039	0.106587172630758	0.119307072189232	0.905086656991907	439	1.35286183363037	1.36557843712987	1.14550221744347	3.11276070004572	2.300871103513	3.02496099593896	2.21514994209832	34035615.8817323	1.75102595311417	34156813.2078874	1.80620684533942	19437527.9368079	18910798.226694	0.237265849467152	0.094326476532438	2.51536851782605	0.0122142596317103	483	1.35286183363037	1.59012768309752	1.06091081064367	3.11276070004572	2.300871103513	3.0200167470721	1.8992290865531	34035615.8817323	1.75102595311417	37509426.5558219
AASHTSDFNPNAGSDQR	O70305	Atxn2 Atx2 Sca2	Atxn2	IPI00117229;IPI00461237;IPI00461238;	AF041472;U70670;		Ataxin-2 (Spinocerebellar ataxia type 2 protein homolog)	T14171;	NP_033151.2;	Mm.260900;	mmu:20239;	cerebellar Purkinje cell differentiation; homeostasis of number of cells; negative regulation of multicellular organism growth; neuromuscular process; neuron projection morphogenesis; perinuclear region of cytoplasm	GO:0021702; GO:0048872; GO:0040015; GO:0050905; GO:0048812; GO:0048471		Ataxin-2 family	Cytoplasm.	-0.000409601151450424	0.130939536229126	-0.00312817017110615	0.997536696551569	19	-3.35284326729089	-3.35325286844234	0.30002016811619	0.297290035850329	0.088668038482616	0.280993576311247	0.0837973118447743	74609.0814709116	0.525139873375257	47417.9059448188	0.325109250292968	142074.683819709	145852.220144732	0.188631600558216	0.113212121189564	1.66617848492007	0.110525652155572	21	-3.35284326729089	-3.16421166673268	0.271473129811006	0.297290035850329	0.088668038482616	0.226260404401559	0.071506090057241	74609.0814709116	0.525139873375257	76626.655704517
AASIFGGAKPVDTAAR	Q8BGD9	Eif4b	Eif4b	IPI00221581;	AK045250;AK077423;AK170354;	ENSMUST00000169681;	Eukaryotic translation initiation factor 4B (eIF-4B)		NP_663600.2;	Mm.290022;Mm.391795;	mmu:75705;	nucleotide binding; translation initiation factor activity	GO:0000166; GO:0003743				0.0896143731626485	0.34898954723477	0.25678239899364	0.797879651991371	99	-1.83682855360824	-1.74721418044559	1.78803935417461	3.49880732988127	1.90480887451813	1.91378582874898	1.09533556341725	4212192.78821482	1.96022952743863	2676105.01913494	2.2039563951392	2148826.31306894	1214227.75198142	0.0260350531704486	0.361464878507636	0.0720265085723912	0.942712807875817	109	-1.83682855360824	-1.81079350043779	1.93813948900564	3.49880732988127	1.90480887451813	3.1946007319018	1.76419935852953	4212192.78821482	1.96022952743863	4171021.7191213
AASLGLLQFPILNASVDENCQNITYK	P53395	Dbt	Dbt	IPI00130535;	L42996;AK165959;CH466532;	ENSMUST00000000349;	Lipoamide acyltransferase component of branched-chain alpha-keto acid dehydrogenase complex, mitochondrial (EC 2.3.1.168) (Branched-chain alpha-keto acid dehydrogenase complex component E2) (BCKAD-E2) (BCKADE2) (Dihydrolipoamide acetyltransferase component of branched-chain alpha-keto acid dehydrogenase complex) (Dihydrolipoamide branched chain transacylase) (Dihydrolipoyllysine-residue (2-methyl…	S65760;	NP_034152.2;	Mm.3636;	mmu:13171;	cofactor binding; dihydrolipoyllysine-residue (2-methylpropanoyl)transferase activity; fatty-acyl-CoA biosynthetic process; microtubule cytoskeleton; mitochondrial nucleoid; mitochondrion	GO:0048037; GO:0043754; GO:0046949; GO:0015630; GO:0042645; GO:0005739		2-oxoacid dehydrogenase family	Mitochondrion matrix.	0.0969017037047493	0.0828300003064957	1.16988655494608	0.242711644417108	419	-0.46569163817101	-0.368789934466259	0.869715003218205	2.19029035219492	4.70330616370357	1.98074578314055	5.37093233308341	2247842.74291754	1.08586029252595	2615560.13956387	1.15677624892199	2070103.08636349	2261076.97318418	0.0989382416911935	0.0763087866088308	1.29655110620962	0.19543430512435	461	-0.46569163817101	-0.366753396479816	0.838529059025823	2.19029035219492	4.70330616370357	1.96011867132382	5.34451402533009	2247842.74291754	1.08586029252595	1804654.29464929
AASQVEDLAAGK	Q3UE20		NA	IPI00651882;	AK149797;		0					oxidoreductase activity	GO:0016491				-0.0151053674374197	0.164156808646691	-0.0920179160520259	0.927647088431975	19	0.93251150352674	0.917406136089321	0.376130500732922	0.381926902654095	0.409568033434071	0.33492207035147	0.365075027489091	1461697.05119747	0.528290793194318	904499.649815847	0.321808288017769	2766841.80384689	2810678.54214465	-0.220380058089344	0.181963097622747	-1.21112500813898	0.239301306392393	21	0.93251150352674	0.712131445437396	0.436332179829401	0.381926902654095	0.409568033434071	0.492122688108908	0.6910559718461	1461697.05119747	0.528290793194318	912299.043210313
AASQYPELDFLEEHVLR	Q3V053	4933427I04Rik	4933427I04Rik	IPI00653011;	AK133427;	ENSMUST00000097896;	0										0.450038551470156	0.345290758666365	1.30336112442848	0.208025012552158	19	-1.54253892333511	-1.09250037186496	0.791160519178674	0.811998467965685	0.526403875897063	0.687279651910225	0.629088712104511	368691.596670742	0.670454202754558	230235.174336951	0.328589485741008	549913.171035358	700677.241141005	0.382453265823213	0.345830431581959	1.10589824057336	0.281279420571374	21	-1.54253892333511	-1.1600856575119	0.829272242750801	0.811998467965685	0.526403875897063	0.83558004186796	0.720274435303404	368691.596670742	0.670454202754558	967336.927103292
AASVAENCINYQQGTPHK	P70202	Lxn	Lxn	IPI00331745;	D88769;AK032170;AK149981;	ENSMUST00000058981;	Latexin (Endogenous carboxypeptidase inhibitor) (ECI) (Tissue carboxypeptidase inhibitor) (TCI)		NP_058033.2;	Mm.2632;	mmu:17035;	cytoplasm; detection of temperature stimulus involved in sensory perception of pain; metalloendopeptidase inhibitor activity	GO:0005737; GO:0050965; GO:0008191		Protease inhibitor I47 (latexin) family	Cytoplasm.	0.200269879038888	0.15716249333576	1.2742854531522	0.217928275110883	19	-2.67840525638155	-2.47813537734266	0.360104511059556	0.406976886209135	0.151947463976736	0.219282853876352	0.0884870358097596	132439.022784459	0.567286252190902	77258.0745170791	0.290466167184768	233460.659892549	265979.598470532	-0.31195209257315	0.253561669985658	-1.23028095133935	0.232195999288659	21	-2.67840525638155	-2.9903573489547	0.608019525010517	0.406976886209135	0.151947463976736	0.791889380162743	0.264814297341271	132439.022784459	0.567286252190902	58730.8927243685
AASYFFDGSSYAVVR	P97927	Lama4	Lama4	IPI00223446;	U58950;Y09827;U59865;BC115942;U88352;U69176;	ENSMUST00000019992;	Laminin subunit alpha-4 (Laminin-14 subunit alpha) (Laminin-8 subunit alpha) (Laminin-9 subunit alpha)		NP_034811.2;	Mm.258065;	mmu:16775;	basal lamina; blood vessel development; brown fat cell differentiation; cell adhesion; laminin-1 complex; regulation of cell adhesion; regulation of cell migration; regulation of embryonic development	GO:0005605; GO:0001568; GO:0050873; GO:0007155; GO:0005606; GO:0030155; GO:0030334; GO:0045995			Secreted › extracellular space › extracellular matrix › basement membrane.	0.0483520727319968	0.0755573146637573	0.639939004544717	0.522702297424872	299	-0.741543689910493	-0.693191617178496	0.670504652621327	1.67790998195774	2.26272572309296	1.62570351446667	2.34524404822404	2785849.92770229	1.60618347411665	2937852.80738684	1.63607679433567	1734453.11360485	1795669.26048833	0.249958486209929	0.076068501359849	3.2859656985679	0.00112594593990103	329	-0.741543689910493	-0.491585203700563	0.706454851742311	1.67790998195774	2.26272572309296	1.55299240230573	3.15915204651215	2785849.92770229	1.60618347411665	3638740.61693635
AATAAADFTAK	Q9Z1Z2	Strap Unrip	Strap	IPI00918973;	AF096285;AK075804;AK077504;AK145971;AK152283;	ENSMUST00000064910;	Serine-threonine kinase receptor-associated protein (UNR-interacting protein)		NP_035629.2;	Mm.22584;	mmu:20901;	RNA splicing; cell junction; cytosol; mRNA processing; mitochondrion; negative regulation of transcription from RNA polymerase II promoter; negative regulation of transforming growth factor beta receptor signaling pathway; plasma membrane; receptor binding; spliceosomal complex	GO:0008380; GO:0030054; GO:0005829; GO:0006397; GO:0005739; GO:0000122; GO:0030512; GO:0005886; GO:0005102; GO:0005681		WD repeat STRAP family	Cytoplasm. Nucleus.	0.177797179874199	0.129290942156144	1.37517119845468	0.171290763716948	139	-1.0070339080213	-0.8292367281471	0.783784682705116	1.06188354388512	1.05446652334835	0.782117695207455	0.943177826861418	640076.464278467	0.738724392646333	463122.034628133	0.502258732357158	866461.796375128	922078.611664246	0.15164621441463	0.130931273648032	1.15821232154423	0.24858211120694	153	-1.0070339080213	-0.855387693606669	0.830665809076437	1.06188354388512	1.05446652334835	0.951501163459129	1.11236246507967	640076.464278467	0.738724392646333	1146366.88738574
AATASLSQASSEGTTTCK	Q9ESY9	Ifi30 Gilt Ip30	Ifi30	IPI00990499;	AF309649;AF309650;AF290973;AK156914;CH466569;BC054852;	ENSMUST00000034299;	Gamma-interferon-inducible lysosomal thiol reductase (EC 1.8.-.-) (Gamma-interferon-inducible protein IP-30) (Lysosomal thiol reductase IP30)		NP_075552.2;	Mm.30241;	mmu:65972;	antigen processing and presentation of exogenous peptide antigen via MHC class I; antigen processing and presentation of exogenous peptide antigen via MHC class II; disulfide oxidoreductase activity; extracellular region; lysosome; negative regulation of fibroblast proliferation; protein stabilization	GO:0042590; GO:0019886; GO:0015036; GO:0005576; GO:0005764; GO:0048147; GO:0050821		GILT family	Secreted. Lysosome.	0.693211651539787	0.577468542137462	1.20043188668583	0.244725162588021	19	-1.03385077330861	-0.340639121768826	1.32314665290036	1.34293033364484	1.29895954843375	1.1793696064505	3.46222594846542	961937.703820806	0.951832032773311	840491.478490797	0.609602080323525	1010617.07391592	1378754.28188292	0.495803154533306	0.513881143760397	0.964820679943999	0.34561471481517	21	-1.03385077330861	-0.538047618775307	1.23224369424105	1.34293033364484	1.29895954843375	1.03831449374268	1.92978178419611	961937.703820806	0.951832032773311	869738.743599188
AATGEEVSAEDLGGADLHCR	Q3ULD5	Mccc2	Mccc2	IPI00553717;	AK132265;AK143233;AK145564;AK146865;AK146844;	ENSMUST00000022148;	Methylcrotonoyl-CoA carboxylase beta chain, mitochondrial (MCCase subunit beta) (EC 6.4.1.4) (3-methylcrotonyl-CoA carboxylase 2) (3-methylcrotonyl-CoA carboxylase non-biotin-containing subunit) (3-methylcrotonyl-CoA:carbon dioxide ligase subunit beta)		NP_084302.1;	Mm.137327;	mmu:78038;	ATP binding; coenzyme A metabolic process; leucine catabolic process; methylcrotonoyl-CoA carboxylase activity; mitochondrial matrix; mitochondrion	GO:0005524; GO:0015936; GO:0006552; GO:0004485; GO:0005759; GO:0005739	Amino-acid degradation; L-leucine degradation; (S)-3-hydroxy-3-methylglutaryl-CoA from 3-isovaleryl-CoA: step 2/3.	AccD/PCCB family	Mitochondrion matrix.	0.458287845727226	0.114772078572741	3.99302558101505	7.42852398757286e-05	539	-0.189371757279675	0.268916088447549	1.36646269810847	2.41141820958701	12.7337795467869	2.23550871823816	8.3130344902149	7000831.65410269	1.84484694266358	5533975.29390277	1.35988091434478	3794803.51036327	4069455.81449619	0.68243806949865	0.102965628173088	6.62782407689929	7.6643178700274e-11	593	-0.189371757279675	0.493066312218976	1.28294511606438	2.41141820958701	12.7337795467869	1.96497060101244	3.98520554399542	7000831.65410269	1.84484694266358	5394357.83548135
AATIIATSEGSLWGLDR	P12367	Prkar2a	Prkar2a	IPI00116546;	J02935;		cAMP-dependent protein kinase type II-alpha regulatory subunit	OKMS2R;		Mm.253102;Mm.486392;		cAMP binding; cAMP-dependent protein kinase complex; cAMP-dependent protein kinase regulator activity; cytoplasm; plasma membrane; signal transduction	GO:0030552; GO:0005952; GO:0008603; GO:0005737; GO:0005886; GO:0007165		CAMP-dependent kinase regulatory chain family	Cytoplasm. Cell membrane.	0.0828008317410361	0.0737817470009694	1.12224005403326	0.262989272531558	219	-0.532375155529242	-0.449574323788206	0.560692734483196	1.70811734624691	3.20848433385071	1.74977614772402	3.89207313482684	1493949.48499744	0.946614704625134	1443714.93281362	0.842204358566978	1578202.27986956	1714209.76171403	0.125985735896156	0.0693547137657238	1.81654179010426	0.0705295721852976	241	-0.532375155529242	-0.406389419633085	0.551577127278213	1.70811734624691	3.20848433385071	1.61181894854515	3.96619318977449	1493949.48499744	0.946614704625134	1264327.19328675
AATLPNTEGEQPGPSVGPVGK	Q9D6T0	Nosip	Nosip	IPI00109529;IPI00830172;	AK007962;AK010006;BC089029;	ENSMUST00000003513;ENSMUST00000107829;ENSMUST00000107830;	Nitric oxide synthase-interacting protein		NP_001157156.1;NP_079809.1;	Mm.272139;	mmu:66394;	cytoplasm; negative regulation of nitric-oxide synthase activity; nucleus	GO:0005737; GO:0051001; GO:0005634		NOSIP family	Cytoplasm. Nucleus.	-1.52096849727442	0.644033394218884	-2.36162986411462	0.0290255896702501	19	2.41882384929836	0.897855352023937	1.47566588954368	0.310397659585463	0.12832586369425	2.32601957637972	2.59063954025159	2645649.45277431	0.352373067196125	2411329.63404103	0.556823519933822	7508092.13038345	4330509.66368593	0.192556660048088	0.197666788502191	0.974147764058775	0.341071649183267	21	2.41882384929836	2.61138050934645	0.473988307705399	0.310397659585463	0.12832586369425	0.621962390992827	0.238173789214842	2645649.45277431	0.352373067196125	3408028.77027144
AATMSAVEAATCR	Q9DCC4	Pycrl	Pycrl	IPI00153234;	AK002912;AK004291;BC026536;	ENSMUST00000053918;	Pyrroline-5-carboxylate reductase 3 (P5C reductase 3) (P5CR 3) (EC 1.5.1.2) (Pyrroline-5-carboxylate reductase-like protein)		NP_079688.2;	Mm.250599;	mmu:66194;	L-proline biosynthetic process; nucleotide binding; pyrroline-5-carboxylate reductase activity	GO:0055129; GO:0000166; GO:0004735	Amino-acid biosynthesis; L-proline biosynthesis; L-proline from L-glutamate 5-semialdehyde: step 1/1.	Pyrroline-5-carboxylate reductase family		0.248610467514919	0.414843396157011	0.59928751383769	0.556060495287543	19	-3.00759773440858	-2.75898726689366	0.950525632221028	1.06812005360822	0.355140596559287	0.597943940347078	0.216725878920167	113309.908209223	0.557405854704254	130363.508878596	0.540532691800339	203280.800251628	241175.993341675	0.610051489581632	0.364841987159996	1.67209781508536	0.109340108106321	21	-3.00759773440858	-2.39754624482694	0.874860351524981	1.06812005360822	0.355140596559287	0.484076941582739	0.201905153081909	113309.908209223	0.557405854704254	95656.0708212667
AAVAGSSHVCSCK	Q9Z2U2	Zfp292 Zfp15	Zfp292	IPI00131408;IPI00649702;	BX465850;BX649603;BX465850;BX649603;BX649603;BX465850;BX649603;BX465850;BC008537;BC036997;AF017806;AK034951;AK046236;	ENSMUST00000047950;ENSMUST00000098163;	Zinc finger protein 292 (Zinc finger protein 15) (Zfp-15)		NP_038917.2;	Mm.38193;	mmu:30046;	DNA binding; metal ion binding; nucleus; positive regulation of transcription from RNA polymerase II promoter; transcription, DNA-dependent; zinc ion binding	GO:0003677; GO:0046872; GO:0005634; GO:0045944; GO:0006351; GO:0008270		Krueppel C2H2-type zinc-finger protein family	Nucleus.	-1.56863982882171	1.17857215001314	-1.33096631275753	0.198952188258359	19	-3.70781131405461	-5.27645114287632	2.70044804470103	2.44936690207363	0.660596425926316	2.89602060820282	0.548857656364867	198321.431977257	0.900532312923998	187223.108283404	1.5258883411439	220226.89150744	122697.777573325	0.769651435587512	0.980548027622902	0.784919671352909	0.44126630328998	21	-3.70781131405461	-2.9381598784671	2.35127157049801	2.44936690207363	0.660596425926316	2.16358900381566	0.736375518456964	198321.431977257	0.900532312923998	322441.742091796
AAVASLLQSVQVPEFTPK	Q02053	Uba1 Sbx Ube1 Ube1ax Ube1x	Uba1	IPI00123313;	D10576;AK088057;AK088528;AK143416;AK171667;AL807240;BC058630;BC145984;X62580;U09051;U09055;	ENSMUST00000001989;ENSMUST00000089217;	Ubiquitin-like modifier-activating enzyme 1 (Ubiquitin-activating enzyme E1) (Ubiquitin-activating enzyme E1 X) (Ubiquitin-like modifier-activating enzyme 1 X)	I48756;I63168;JC1254;	NP_001129557.1;NP_033483.1;	Mm.1104;	mmu:22201;	ATP binding; ligase activity; protein ubiquitination; small protein activating enzyme activity	GO:0005524; GO:0016874; GO:0016567; GO:0008641	Protein modification; protein ubiquitination.	Ubiquitin-activating E1 family		0.11927574649584	0.072433650547361	1.64668970284538	0.100183864457565	559	0.563045867156504	0.682321613652343	0.878211340480029	2.26194978750774	4.01734551206467	2.1852467948917	3.20266389217025	32418771.4937494	3.25728565516479	21991608.384044	2.54424066327762	9952695.2578893	8643682.45561854	-0.0561307363681609	0.069663997802963	-0.805735216731613	0.420706961152766	615	0.563045867156504	0.506915130788343	0.8839370379006	2.26194978750774	4.01734551206467	2.24718386607471	4.43305738887681	32418771.4937494	3.25728565516479	29181641.3036937
AAVAWEAGKPLSIEEIEVAPPK	P28474	Adh5 Adh-2 Adh2	Adh5	IPI00555004;	M84147;U48970;U48964;U48965;U48966;U48968;U48969;AK076507;AK146949;AK159803;BC090978;	ENSMUST00000005964;	Alcohol dehydrogenase class-3 (EC 1.1.1.1) (Alcohol dehydrogenase 2) (Alcohol dehydrogenase 5) (Alcohol dehydrogenase B2) (ADH-B2) (Alcohol dehydrogenase class-III) (Glutathione-dependent formaldehyde dehydrogenase) (FALDH) (FDH) (GSH-FDH) (EC 1.1.1.-) (S-(hydroxymethyl)glutathione dehydrogenase) (EC 1.1.1.284)	A56643;	NP_031436.2;	Mm.3874;	mmu:11532;	S-(hydroxymethyl)glutathione dehydrogenase activity; aging; alcohol dehydrogenase (NAD) activity; ethanol catabolic process; ethanol oxidation; fatty acid binding; formaldehyde catabolic process; formaldehyde dehydrogenase activity; metal ion binding; mitochondrion; nucleotide binding; nucleus; peptidyl-cysteine S-nitrosylation; positive regulation of blood pressure; respiratory system process; r…	GO:0051903; GO:0007568; GO:0004022; GO:0006068; GO:0006069; GO:0005504; GO:0046294; GO:0018467; GO:0046872; GO:0005739; GO:0000166; GO:0005634; GO:0018119; GO:0045777; GO:0003016; GO:0032496; GO:0051409; GO:0051775; GO:0001523; GO:0008270		Zinc-containing alcohol dehydrogenase family, Class-III subfamily	Cytoplasm.	0.180344806959352	0.0856855954821021	2.10472724084671	0.0359399011901335	399	-0.554417606555935	-0.374072799596583	0.878016078257031	2.59491200820324	4.68042857499231	2.27611913530365	6.08469564683218	3597340.00037189	1.36899626702445	3329133.6710063	1.25306653720594	2627720.82512014	2656789.22240596	0.113981660140367	0.0819847080702937	1.39027951459727	0.16514846778281	439	-0.554417606555935	-0.440435946415567	0.879188046493865	2.59491200820324	4.68042857499231	2.44941969198213	5.56135281853451	3597340.00037189	1.36899626702445	3419149.84734832
AAVDAGFVPNDMQVGQTGK	Q99LC5	Etfa	Etfa	IPI00116753;	AK028118;AK032830;AK133525;AK167572;AK168321;BC003432;BC096645;	ENSMUST00000034866;	Electron transfer flavoprotein subunit alpha, mitochondrial (Alpha-ETF)		NP_663590.3;	Mm.290853;	mmu:110842;	electron carrier activity; electron transport chain; flavin adenine dinucleotide binding; mitochondrial electron transfer flavoprotein complex; oxidoreductase activity	GO:0009055; GO:0022900; GO:0050660; GO:0017133; GO:0016491		ETF alpha-subunit/FixB family	Mitochondrion matrix.	0.0517801607640785	0.0549927379520684	0.941581792294284	0.346654233153177	919	1.95789980273054	2.00967996349463	0.854602010548047	3.21487365214005	1.64200111142384	3.25699103541981	1.62065159357823	65227168.3390091	1.84689607702665	76803207.7059854	1.83938478050849	35317183.8688506	41754834.8338261	0.100680237207902	0.0518761589055875	1.94078049207799	0.0525625916915025	1011	1.95789980273054	2.05858003993845	0.843685626113191	3.21487365214005	1.64200111142384	3.2485730756305	1.57806498295186	65227168.3390091	1.84689607702665	64827829.5383542
AAVEDPRVLLLDL	Q9D2G2	Dlst	Dlst	IPI00134809;IPI00845858;	AK019713;AK054053;AK149664;AK158877;AK168570;AK169943;CT010197;BC006702;BC024066;	ENSMUST00000053811;	Dihydrolipoyllysine-residue succinyltransferase component of 2-oxoglutarate dehydrogenase complex, mitochondrial (EC 2.3.1.61) (2-oxoglutarate dehydrogenase complex component E2) (OGDC-E2) (Dihydrolipoamide succinyltransferase component of 2-oxoglutarate dehydrogenase complex) (E2K)		NP_084501.1;	Mm.296221;	mmu:78920;	2-oxoglutarate metabolic process; L-lysine catabolic process to acetyl-CoA via saccharopine; NADH metabolic process; dihydrolipoyllysine-residue succinyltransferase activity; mitochondrion; nucleus; oxoglutarate dehydrogenase complex; plasma membrane; tricarboxylic acid cycle	GO:0006103; GO:0033512; GO:0006734; GO:0004149; GO:0005739; GO:0005634; GO:0045252; GO:0005886; GO:0006099	Amino-acid degradation; L-lysine degradation via saccharopine pathway; glutaryl-CoA from L-lysine: step 6/6.	2-oxoacid dehydrogenase family	Mitochondrion.	-0.0578006375089017	0.0727324680483876	-0.794701995681598	0.427101621984149	599	0.843147747438993	0.785347109930095	0.912785229708792	2.65312571370874	3.14669133822328	2.62900426258716	3.34756979346517	21622417.9447233	2.19994915856279	20919480.5886409	2.23891476277021	9828598.92946302	9343580.62062049	-0.0062782323348182	0.0744348197439865	-0.084345368960545	0.932807457411743	659	0.843147747438993	0.836869515104167	0.97762137984506	2.65312571370874	3.14669133822328	2.75792833949144	3.29552969694225	21622417.9447233	2.19994915856279	19828157.323983
AAVEEGIVLGGGCALLR	P63038	Hspd1 Hsp60	Hspd1	IPI00308885;IPI00845678;	X55023;AK088844;AK143882;AK146831;BC016400;BC018545;BC106112;X53584;	ENSMUST00000027123;	60 kDa heat shock protein, mitochondrial (60 kDa chaperonin) (Chaperonin 60) (CPN60) (HSP-65) (Heat shock protein 60) (HSP-60) (Hsp60) (Mitochondrial matrix protein P1)	HHMS60;	NP_034607.3;	Mm.1777;	mmu:15510;	ATP binding; B cell cytokine production; B cell proliferation; MyD88-dependent toll-like receptor signaling pathway; T cell activation; activation of cysteine-type endopeptidase activity involved in apoptotic process; cell surface; cell surface binding; coated pit; coated vesicle; cyclin-dependent protein kinase activating kinase holoenzyme complex; cytosol; early endosome; extracellular space; i…	GO:0005524; GO:0002368; GO:0042100; GO:0002755; GO:0042110; GO:0006919; GO:0009986; GO:0043498; GO:0005905; GO:0030135; GO:0019907; GO:0005829; GO:0005769; GO:0005615; GO:0048291; GO:0001530; GO:0046696; GO:0005743; GO:0005759; GO:0043066; GO:0044459; GO:0050870; GO:0002842; GO:0043065; GO:0032727; GO:0032729; GO:0032733; GO:0032735; GO:0032755; GO:0043032; GO:0042026; GO:0006986; GO:0030141		Chaperonin (HSP60) family	Mitochondrion matrix.	-0.0295731964929152	0.0525038167082544	-0.563258032406354	0.573350760677403	1379	0.846599304266479	0.817026107773556	0.999298124208352	2.81857578495345	3.32929140237784	2.75073147015907	3.36676079746702	23892668.8973991	2.11218994988044	18864544.9313213	1.69143499659871	11311799.3477582	11152982.5084948	0.164073363648055	0.0468963695489174	3.49863678630625	0.00048115324788186	1517	0.846599304266479	1.01067266791455	0.934109289616385	2.81857578495345	3.32929140237784	2.79559726358684	2.76607585456463	23892668.8973991	2.11218994988044	19998310.8595348
AAVENLPTFLVELSR	P70168	Kpnb1 Impnb	Kpnb1	IPI00323881;	D67015;D45836;AL627445;CH466556;BC052438;BC055115;	ENSMUST00000001479;	Importin subunit beta-1 (Karyopherin subunit beta-1) (Nuclear factor p97) (Pore targeting complex 97 kDa subunit) (PTAC97) (SCG)	S66288;	NP_032405.3;	Mm.251013;	mmu:16211;	cytoplasm; nuclear membrane; nuclear pore; protein complex; protein transporter activity; ribosomal protein import into nucleus	GO:0005737; GO:0031965; GO:0005643; GO:0043234; GO:0008565; GO:0006610		Importin beta family	Cytoplasm. Nucleus envelope.	-0.194309884922743	0.116395321551582	-1.66939600606398	0.0976676221121801	119	-0.936694570383246	-1.13100445530599	0.653267122004107	1.6697332828812	1.78258029423405	1.70332664105981	1.50603000109224	797650.284877902	0.740501284220839	875263.046877805	0.802116451643977	1077176.09931925	1091191.98974651	-0.256819739445967	0.130937535210095	-1.96139127740481	0.0519542736646925	131	-0.936694570383246	-1.19351430982921	0.769083880586426	1.6697332828812	1.78258029423405	1.72994558185265	1.4494552495983	797650.284877902	0.740501284220839	636094.648222615
AAVEQVPVEPYKIPLSQAEVIQEGSDVTLVAWGTQVHVIR	Q6P3A8	Bckdhb	Bckdhb	IPI00115302;IPI00661338;	BC064099;	ENSMUST00000034801;	2-oxoisovalerate dehydrogenase subunit beta, mitochondrial (EC 1.2.4.4) (Branched-chain alpha-keto acid dehydrogenase E1 component beta chain) (BCKDE1B) (BCKDH E1-beta)		NP_954665.1;	Mm.12819;	mmu:12040;	3-methyl-2-oxobutanoate dehydrogenase (2-methylpropanoyl-transferring) activity; alpha-ketoacid dehydrogenase activity; branched-chain amino acid catabolic process; mitochondrial alpha-ketoglutarate dehydrogenase complex; mitochondrial inner membrane; response to cAMP; response to glucocorticoid stimulus; response to nutrient	GO:0003863; GO:0003826; GO:0009083; GO:0005947; GO:0005743; GO:0051591; GO:0051384; GO:0007584			Mitochondrion matrix.	0.0499531499686507	0.106004559975646	0.471235859854774	0.6379021650287	239	1.27079210606504	1.32074525603369	0.841385110603175	2.39658340918428	1.88589730589782	2.46508501622359	1.86643488209562	21845461.6614465	1.96844741579913	23959499.6564685	1.8446913966362	11097813.1730168	12988351.1682001	0.0795223490050203	0.103947986837069	0.765020578317368	0.44494521225518	263	1.27079210606504	1.35031445507006	0.863456827963087	2.39658340918428	1.88589730589782	2.38612395352683	1.76708761767868	21845461.6614465	1.96844741579913	20753881.4025781
AAVEWFDGKDFQGSK	Q61545	Ewsr1 Ews Ewsh	Ewsr1	IPI00742310;	X79233;AK019460;AK151625;AL645845;CH466574;	ENSMUST00000079949;	RNA-binding protein EWS	A55726;	NP_031994.2;	Mm.142822;	mmu:14030;	RNA binding; cytoplasm; metal ion binding; nucleotide binding; nucleus; plasma membrane; regulation of transcription, DNA-dependent; transcription, DNA-dependent; zinc ion binding	GO:0003723; GO:0005737; GO:0046872; GO:0000166; GO:0005634; GO:0005886; GO:0006355; GO:0006351; GO:0008270		RRM TET family	Nucleus. Cytoplasm. Cell membrane.	0.135499102354587	0.189438173404525	0.715268205554555	0.477264374553783	59	-1.14677202217532	-1.01127291982073	0.751809443476055	1.14400163774846	0.997584189033841	1.00618670497859	0.994970482505314	653951.074825191	0.792100094831667	612040.926694647	0.681204336135572	825591.461347022	898468.923681132	0.372885338780542	0.153162056502716	2.4345803869115	0.0176639562829008	65	-1.14677202217532	-0.773886683394775	0.636129796719532	1.14400163774846	0.997584189033841	0.98964937645707	1.27880398731739	653951.074825191	0.792100094831667	767929.116111967
AAVFNHFISDGVK	P01027	C3	C3	IPI00323624;IPI00759878;	K02782;BC043338;M35659;M33032;J00369;J00367;Z37998;	ENSMUST00000024988;	Complement C3 (HSE-MSF) [Cleaved into: Complement C3 beta chain; Complement C3 alpha chain; C3a anaphylatoxin; Acylation stimulating protein (ASP) (C3adesArg); Complement C3b alpha' chain; Complement C3c alpha' chain fragment 1; Complement C3dg fragment; Complement C3g fragment; Complement C3d fragment; Complement C3f fragment; Complement C3c alpha' chain fragment 2]	C3MS;I48284;	NP_033908.2;	Mm.19131;	mmu:12266;	C5L2 anaphylatoxin chemotactic receptor binding; complement activation; complement activation, alternative pathway; complement activation, classical pathway; endopeptidase inhibitor activity; extracellular space; fatty acid metabolic process; inflammatory response; negative regulation of endopeptidase activity; positive regulation of G-protein coupled receptor protein signaling pathway; positive …	GO:0031715; GO:0006956; GO:0006957; GO:0006958; GO:0004866; GO:0005615; GO:0006631; GO:0006954; GO:0010951; GO:0045745; GO:0001970; GO:0045766; GO:0010828; GO:0010884; GO:0050766; GO:0001934; GO:0001798; GO:0010575; GO:0010866			Secreted.	-0.357861703292547	0.042737692089977	-8.37344474613018	1.43181207601146e-16	1299	0.143826685965027	-0.214035017327517	0.789491385935835	1.58071408116217	10.9904088421153	1.70075818312356	7.94616789513957	4885997.00280643	1.70914602358093	7509543.16194484	2.64598901262019	2858735.84550108	2838085.54235398	-0.00718298053881421	0.0430203200809741	-0.166967157038678	0.867419513629235	1429	0.143826685965027	0.136643705426207	0.831695282255594	1.58071408116217	10.9904088421153	1.74207767874183	12.7490518008721	4885997.00280643	1.70914602358093	8512376.23527826
AAVLWELHKPFTIEDIEVAPPK	P00329	Adh1 Adh-1	Adh1	IPI00221400;	M18480;M18472;M18473;M18474;M18475;M18476;M18477;M18478;M22679;M22671;M22672;M22673;M22674;M22675;M22676;M22677;M11307;BC013477;BC054467;M22611;	ENSMUST00000004232;	Alcohol dehydrogenase 1 (EC 1.1.1.1) (ADH-A2) (Alcohol dehydrogenase A subunit)	DEMSAA;	NP_031435.1;	Mm.2409;Mm.412004;	mmu:11522;	NAD binding; acetaldehyde biosynthetic process; alcohol dehydrogenase (NAD) activity; behavioral response to ethanol; cytosol; drug binding; embryo development; ethanol binding; ethanol catabolic process; ethanol oxidation; metal ion binding; mitochondrion; organ regeneration; response to progesterone stimulus; response to retinoic acid; response to testosterone stimulus; retinoic acid metabolic …	GO:0051287; GO:0046186; GO:0004022; GO:0048149; GO:0005829; GO:0008144; GO:0009790; GO:0035276; GO:0006068; GO:0006069; GO:0046872; GO:0005739; GO:0031100; GO:0032570; GO:0032526; GO:0033574; GO:0042573; GO:0004745; GO:0042572; GO:0008270		Zinc-containing alcohol dehydrogenase family, Class-I subfamily	Cytoplasm.	0.393778373043679	0.0657894274594582	5.98543547572807	6.1692432886897e-09	299	-0.675984469028783	-0.282206095985104	0.583823252601899	1.51561592560583	2.24208690442752	1.43056265421095	5.06921244637628	1383728.45759157	0.986819355708212	1760173.13931912	0.939347217263861	1402210.49535303	1873825.89416315	-0.187404382721889	0.0658834412095851	-2.84448382296437	0.00472686279199279	329	-0.675984469028783	-0.863388851750674	0.611865303771552	1.51561592560583	2.24208690442752	1.62667635439375	1.8840599471436	1383728.45759157	0.986819355708212	1315337.92288471
AAVMATLLFPGQEFK	Q9WVQ5	Apip Mmrp19	Apip	IPI00330933;	AB028863;AK077705;AK145450;BC028434;	ENSMUST00000011055;	Probable methylthioribulose-1-phosphate dehydratase (MTRu-1-P dehydratase) (EC 4.2.1.109) (APAF1-interacting protein) (Monocyte/macrophage protein 19)		NP_062709.3;	Mm.24772;	mmu:56369;	L-methionine salvage from methylthioadenosine; apoptotic process; cytoplasm; metal ion binding; methylthioribulose 1-phosphate dehydratase activity; negative regulation of apoptotic process	GO:0019509; GO:0006915; GO:0005737; GO:0046872; GO:0046570; GO:0043066	Amino-acid biosynthesis; L-methionine biosynthesis via salvage pathway; L-methionine from S-methyl-5-thio-alpha-D-ribose 1-phosphate: step 2/6.	Aldolase class II family, MtnB subfamily	Cytoplasm.	-0.0757851304947659	0.1487134623259	-0.509605043884229	0.611136320844451	139	-0.706875930333376	-0.782661060828143	0.901527453812785	1.49203167016404	2.11074052197586	1.39049258117018	1.77662164474988	1985582.82323197	1.30993927356431	1728218.94712484	1.22567286331565	1515782.34449698	1410016.48877966	0.0567448047285905	0.137133941992272	0.413791100176995	0.679606554377256	153	-0.706875930333376	-0.650131125604786	0.870017328198226	1.49203167016404	2.11074052197586	1.31577538102697	2.02386153993622	1985582.82323197	1.30993927356431	1694432.82968214
AAVPSGASTGIYEALELRDGDKA	P21550	Eno3 Eno-3	Eno3	IPI00228548;	X61600;X57747;X62667;AK002485;BC013460;M20745;	ENSMUST00000072841;ENSMUST00000108548;ENSMUST00000170716;	Beta-enolase (EC 4.2.1.11) (2-phospho-D-glycerate hydro-lyase) (Enolase 3) (Muscle-specific enolase) (MSE) (Skeletal muscle enolase)	NOMSB;	NP_001129534.1;NP_031959.1;	Mm.251322;	mmu:13808;	aging; glycolysis; magnesium ion binding; phosphopyruvate hydratase activity; phosphopyruvate hydratase complex; response to drug; skeletal muscle tissue regeneration	GO:0007568; GO:0006096; GO:0000287; GO:0004634; GO:0000015; GO:0042493; GO:0043403	Carbohydrate degradation; glycolysis; pyruvate from D-glyceraldehyde 3-phosphate: step 4/5.	Enolase family	Cytoplasm.	-0.0973821461222266	0.0532953063429998	-1.82721805735558	0.067991168820624	919	1.79931132432281	1.70192917820058	0.828223464581811	2.55291068949797	1.41882655602069	2.6062832365937	1.53136997119309	49767436.2984809	2.33118484403098	48417633.3475066	2.2926485490436	21348558.6206992	21118646.1037408	0.251304085905997	0.0482559835724694	5.20772901724396	2.31568821820994e-07	1011	1.79931132432281	2.0506154102288	0.784809063989154	2.55291068949797	1.41882655602069	2.61250122942233	1.27400838616093	49767436.2984809	2.33118484403098	51354707.8543223
AAVPSGASTGIYEALELRDNDK	P17182	Eno1 Eno-1	Eno1	IPI00462072;	X52379;AK002336;BC003891;BC004017;BC010685;BC024644;BC085098;	ENSMUST00000076155;ENSMUST00000080926;	Alpha-enolase (EC 4.2.1.11) (2-phospho-D-glycerate hydro-lyase) (Enolase 1) (Non-neural enolase) (NNE)	S10246;	NP_001020559.1;NP_075608.2;	Mm.372357;Mm.372389;Mm.70666;	mmu:13806;mmu:433182;	glycolysis; magnesium ion binding; phosphopyruvate hydratase activity; phosphopyruvate hydratase complex; plasma membrane	GO:0006096; GO:0000287; GO:0004634; GO:0000015; GO:0005886	Carbohydrate degradation; glycolysis; pyruvate from D-glyceraldehyde 3-phosphate: step 4/5.	Enolase family	Cytoplasm. Cell membrane.	0.00522219248333982	0.046013583646522	0.11349240962097	0.909675827317039	639	1.80411054222882	1.80933273471216	0.596404208435219	2.2421182259273	1.24278317400516	2.32680086765802	1.28599943118156	18366554.9708082	1.47671381432889	17704577.7949569	1.35598766404933	12437450.5016432	13056592.0799651	-0.0793673395133706	0.0438653569296319	-1.80933987703988	0.0708252268341393	703	1.80411054222882	1.72474320271545	0.595018651048669	2.2421182259273	1.24278317400516	2.34518033015613	1.35972724893993	18366554.9708082	1.47671381432889	16711454.1260708
AAVPSIKFCLDNGAK	P09411	Pgk1 Pgk-1	Pgk1	IPI00555069;	M15668;AK145846;AK167710;AK167459;AK167441;AK133877;AK164440;BX469914;BC083355;BC108372;M18735;X55309;X15339;	ENSMUST00000081593;ENSMUST00000085735;	Phosphoglycerate kinase 1 (EC 2.7.2.3)	A25567;	NP_032854.2;	Mm.336204;Mm.336205;	mmu:18655;	ATP binding; cytoplasm; glycolysis; phosphoglycerate kinase activity	GO:0005524; GO:0005737; GO:0006096; GO:0004618	Carbohydrate degradation; glycolysis; pyruvate from D-glyceraldehyde 3-phosphate: step 2/5.	Phosphoglycerate kinase family	Cytoplasm.	-0.0688521646539016	0.0491431050898644	-1.40105442112371	0.16158606860956	799	1.84450213164636	1.77564996699246	0.712151250334806	2.27395766759666	1.23283005673025	2.27551329447492	1.28151005928782	24057814.4781093	1.67495971865558	22696737.0571368	1.53166957562019	14363219.7300957	14818298.5536856	-0.0966824037924187	0.0483932447319314	-1.99784916940328	0.0460407560768686	879	1.84450213164636	1.74781972785394	0.73391989427148	2.27395766759666	1.23283005673025	2.28050301211358	1.30477015207609	24057814.4781093	1.67495971865558	19611944.091313
AAVPTVSDQAAAMQLSQCAK	Q71LX4	Tln2	Tln2	IPI00975167;	AF467081;AK052301;		Talin-2		NP_001074711.2;	Mm.33645;	mmu:70549;	actin cytoskeleton; cell adhesion; cytoplasm; cytoskeletal anchoring at plasma membrane; fascia adherens; focal adhesion; plasma membrane; ruffle; structural constituent of cytoskeleton; synapse	GO:0015629; GO:0007155; GO:0005737; GO:0007016; GO:0005916; GO:0005925; GO:0005886; GO:0001726; GO:0005200; GO:0045202			Cell junction › focal adhesion. Cell junction › synapse. Cell membrane; Peripheral membrane protein; Cytoplasmic side. Cytoplasm › cytoskeleton.	0.0433875336402419	0.109636390109358	0.395740261029798	0.69268190115931	219	-2.16771502645702	-2.12432749281678	0.833164432504893	1.96359662599966	0.905837069003035	1.87776436537316	0.883933560961128	2104916.7746494	2.14656188179859	1838069.18187062	2.02285057546014	980599.158355366	908652.969314117	0.26703421159564	0.107203206613632	2.49091627042509	0.0134155637045665	241	-2.16771502645702	-1.90068081486138	0.852585693579539	1.96359662599966	0.905837069003035	1.70237834645467	0.895667664525161	2104916.7746494	2.14656188179859	1596817.25778169
AAVQVLDDIEK	P16332	Mut	Mut	IPI00133553;	X51941;AK146309;CH466559;	ENSMUST00000169611;	Methylmalonyl-CoA mutase, mitochondrial (MCM) (EC 5.4.99.2) (Methylmalonyl-CoA isomerase)	S08680;	NP_032676.2;	Mm.259884;	mmu:17850;	cobalamin binding; homocysteine metabolic process; metal ion binding; methylmalonyl-CoA mutase activity; mitochondrial matrix; mitochondrion; modified amino acid binding; post-embryonic development	GO:0031419; GO:0050667; GO:0046872; GO:0004494; GO:0005759; GO:0005739; GO:0072341; GO:0009791		Methylmalonyl-CoA mutase family	Mitochondrion matrix.	0.210898904608373	0.0609240787221161	3.46166752180718	0.000577875961650288	559	0.171188344768514	0.382087249376886	0.738665198257217	2.53452517485172	14.8054774305983	2.29950110954447	6.01826183232896	6022785.14632302	1.43695183473653	8159046.20369596	1.70963101276712	4191361.8819571	4772401.8473964	0.168914321139349	0.0589786985492892	2.86398861443484	0.00432611254655636	615	0.171188344768514	0.340102665907864	0.748355789777454	2.53452517485172	14.8054774305983	2.25938329736671	6.64323900941957	6022785.14632302	1.43695183473653	4435763.76112506
AAVSGLWGKVNSDEVGGEALGR	B1Q450	Hbb-b1 HBB1	Hbb-b1	IPI00762198;	AB364474;AB364477;		0			Mm.467412;		heme binding; hemoglobin complex; iron ion binding; oxygen binding; oxygen transporter activity	GO:0020037; GO:0005833; GO:0005506; GO:0019825; GO:0005344		Globin family		0.234255795302694	0.227330243801057	1.03046471681831	0.306997777959497	59	1.64173684678465	1.87599264208735	0.902188935871921	1.10261537185257	0.671615170246099	0.979978504825105	0.522378650555217	6307274.47528419	1.06032069496537	4671357.46917771	0.710108575240256	5948459.27768124	6578370.73379548	0.0348228168449707	0.1952029867229	0.178392848539779	0.85896930631409	65	1.64173684678465	1.67655966362962	0.810738893812659	1.10261537185257	0.671615170246099	0.865386271079006	0.516167894201576	6307274.47528419	1.06032069496537	4051048.94686144
AAVSHWQQQSYLDSGIHSGATTTAPSLSGK	Q02248	Ctnnb1 Catnb	Ctnnb1	IPI00125899;	M90364;AK035311;AK018515;BC006739;BC048153;BC053065;	ENSMUST00000007130;ENSMUST00000178812;	Catenin beta-1 (Beta-catenin)	S35091;	NP_001159374.1;NP_031640.1;	Mm.291928;	mmu:12387;	Schwann cell proliferation; Scrib-APC-beta-catenin complex; T cell differentiation in thymus; Z disc; adherens junction assembly; alpha-catenin binding; anterior/posterior axis specification; apical part of cell; apoptotic process; basolateral plasma membrane; beta-catenin destruction complex; beta-catenin-TCF7L2 complex; bone resorption; branching involved in ureteric bud morphogenesis; cadherin…	GO:0014010; GO:0034750; GO:0033077; GO:0030018; GO:0034333; GO:0045294; GO:0009948; GO:0045177; GO:0006915; GO:0016323; GO:0030877; GO:0070369; GO:0045453; GO:0001658; GO:0045296; GO:0044336; GO:0061324; GO:0044334; GO:0060038; GO:0016342; GO:0005938; GO:0001708; GO:0048469; GO:0016337; GO:0007160; GO:0005924; GO:0071363; GO:0071681; GO:0022009; GO:0005813; GO:0003682; GO:0060982; GO:0007016; GO:…		Beta-catenin family	Cytoplasm. Cytoplasm › cytoskeleton. Nucleus. Cell junction › adherens junction. Cell junction. Cell membrane. Cytoplasm › cytoskeleton › centrosome. Cytoplasm › cytoskeleton › spindle pole.	0.00810979189497259	0.174206153192563	0.0465528441237563	0.962963394902789	99	-0.963419166556698	-0.955309374661725	0.892540937445704	1.94178104492893	2.01551008360041	1.82740161124568	1.9128898550721	2386698.07151955	1.40951392116802	2376408.80248854	1.45019860180496	1693277.40271042	1638678.17796183	0.0965897074455001	0.162887587916876	0.59298384045561	0.554420308985079	109	-0.963419166556698	-0.866829459111198	0.873387388877136	1.94178104492893	2.01551008360041	2.21630285571464	2.55679226452124	2386698.07151955	1.40951392116802	3635738.11549442
AAWNALQDEVGR	Q505D7	Opa3	Opa3	IPI00312507;	AK052774;AK133480;AK154960;AK164755;AK170977;BC094601;BC132309;BC132311;	ENSMUST00000063976;	Optic atrophy 3 protein homolog		NP_997408.2;	Mm.239583;	mmu:403187;	growth; mitochondrion; mitochondrion morphogenesis; neuromuscular process; regulation of lipid metabolic process; visual perception	GO:0040007; GO:0005739; GO:0070584; GO:0050905; GO:0019216; GO:0007601		OPA3 family	Mitochondrion.	-0.267678390392432	0.314335867797236	-0.851568076746174	0.405059534661515	19	-1.6075469120297	-1.87522530242214	0.720233953910234	0.585608717686104	0.364287171530633	0.860400314056212	0.45882503448779	350527.54775948	0.689194294231009	278382.600693266	0.616423624656346	508604.831313342	451609.233582608	-0.336003776125634	0.327067747115936	-1.02732164540373	0.315957498692397	21	-1.6075469120297	-1.94355068815534	0.78428090593874	0.585608717686104	0.364287171530633	0.976502608276776	0.50243228243437	350527.54775948	0.689194294231009	254436.789826551
AAWVKVPSGFYVGSYVHGVTQSPSLQNLVLGK	Q9CZR8	Tsfm	Tsfm	IPI00113052;	AK012240;AK169164;BC057904;	ENSMUST00000040560;	Elongation factor Ts, mitochondrial (EF-Ts) (EF-TsMt)		NP_079813.1;	Mm.29900;	mmu:66399;	mitochondrion; nucleus; translation elongation factor activity	GO:0005739; GO:0005634; GO:0003746		EF-Ts family	Mitochondrion.	0.37588784304322	0.154527852502222	2.43249250511532	0.0158795586556902	199	-0.903920349212469	-0.528032506169252	1.11966066419464	1.84478288258882	2.04086884889368	1.40511401670632	2.66103696323563	3623754.92315637	2.30598873838879	1388667.46311273	0.92033595200191	1571453.86828225	1508870.16865103	0.358431949311478	0.134837019081032	2.65826070432537	0.00843398684081236	219	-0.903920349212469	-0.545488399900992	1.02245232093867	1.84478288258882	2.04086884889368	1.35310121229224	2.48053159799151	3623754.92315637	2.30598873838879	1375105.80653359
AAWYTIDSR	Q8BUJ0	Ttn	Ttn	IPI00756257;	AK084780;		0		NP_035782.3;NP_082280.2;	Mm.373672;Mm.446279;Mm.473358;	mmu:22138;	M band; Z disc; adult heart development; calcium ion binding; cardiac muscle fiber development; cardiac muscle tissue morphogenesis; cardiac myofibril assembly; condensed nuclear chromosome; forward locomotion; heart morphogenesis; in utero embryonic development; mitotic chromosome condensation; muscle contraction; muscle myosin complex; protein serine/threonine kinase activity; regulation of pro…	GO:0031430; GO:0030018; GO:0007512; GO:0005509; GO:0048739; GO:0055008; GO:0055003; GO:0000794; GO:0043056; GO:0003007; GO:0001701; GO:0007076; GO:0006936; GO:0005859; GO:0004674; GO:0045859; GO:0051592; GO:0045214; GO:0048769; GO:0030241; GO:0030240; GO:0005865; GO:0005200				0.0710433164572903	0.07937354276425	0.895050340241185	0.37104392822296	759	-1.52240678408711	-1.45136346762982	1.12110738938969	2.46056336299405	1.61623252649225	2.4181222257972	1.66610382562967	2194575.25219858	1.63696400532522	2319324.57029219	1.62253964459687	1340637.45144022	1429440.92492017	0.402109066056309	0.0814080241009367	4.93942790648916	9.46525295696167e-07	835	-1.52240678408711	-1.12029771803081	1.2033526938442	2.46056336299405	1.61623252649225	2.24980055126288	2.0082166687061	2194575.25219858	1.63696400532522	2759324.78051481
AAYDAFNSWK	Q8BWF0	Aldh5a1	Aldh5a1	IPI00273164;	AK052703;AK144030;AL589699;	ENSMUST00000037615;	Succinate-semialdehyde dehydrogenase, mitochondrial (EC 1.2.1.24) (Aldehyde dehydrogenase family 5 member A1) (NAD(+)-dependent succinic semialdehyde dehydrogenase)		NP_766120.1;	Mm.393311;	mmu:214579;	NAD binding; acetate metabolic process; carboxylic acid binding; central nervous system development; galactosylceramide metabolic process; gamma-aminobutyric acid catabolic process; glucose metabolic process; glucosylceramide metabolic process; glutamate metabolic process; glutamine metabolic process; glutathione metabolic process; glycerophospholipid metabolic process; mitochondrion; neurotransm…	GO:0051287; GO:0006083; GO:0031406; GO:0007417; GO:0006681; GO:0009450; GO:0006006; GO:0006678; GO:0006536; GO:0006541; GO:0006749; GO:0006650; GO:0005739; GO:0042135; GO:0009791; GO:0022904; GO:0006105; GO:0004777; GO:0009013	Amino-acid degradation; 4-aminobutanoate degradation.	Aldehyde dehydrogenase family	Mitochondrion.	0.0746517888114628	0.0673668890817638	1.1081376894346	0.268358461910487	479	0.0333519327367705	0.108003721548233	0.756191454470287	2.04110836946344	61.1991030796581	2.27628287271258	21.075967013748	3571898.58289778	1.19383818278352	4405857.80525859	1.20264510409769	2991945.33598317	3663472.94829274	-0.0346767805697197	0.0753335078887379	-0.460310179912699	0.645483461587678	527	0.0333519327367705	-0.00132484783294966	0.884968339938503	2.04110836946344	61.1991030796581	2.24878981684395	1697.39479577607	3571898.58289778	1.19383818278352	3908212.44285812
AAYFGIYDTAK	P51881	Slc25a5 Ant2	Slc25a5	IPI00127841;	U27316;U10404;X70847;AF240003;BC004570;BC086756;	ENSMUST00000016463;	ADP/ATP translocase 2 (ADP,ATP carrier protein 2) (Adenine nucleotide translocator 2) (ANT 2) (Solute carrier family 25 member 5)	S31814;	NP_031477.1;	Mm.371544;	mmu:11740;	MMXD complex; chromosome segregation; integral to membrane; mitochondrial inner membrane; mitochondrial nucleoid; transmembrane transport; transporter activity	GO:0071817; GO:0007059; GO:0016021; GO:0005743; GO:0042645; GO:0055085; GO:0005215		Mitochondrial carrier family	Mitochondrion inner membrane; Multi-pass membrane protein.	0.26881848796724	0.186752812160077	1.4394347525906	0.151993218630924	159	0.0709807562483451	0.339799244215585	1.21029655030793	2.89137062585686	40.7345705889724	2.58717455651677	7.61383258073211	7994188.3329182	1.58763016474026	7412787.99484343	1.42093425423229	5035296.32433385	5216840.94303748	-0.00842968376642941	0.187449547919734	-0.044970413959275	0.96418216497474	175	0.0709807562483451	0.0625510724819162	1.27134468917929	2.89137062585686	40.7345705889724	2.74163325519669	43.8303157150392	7994188.3329182	1.58763016474026	6462441.90193813
AAYFGVYDTAK	P48962	Slc25a4 Anc1 Ant1	Slc25a4	IPI00115564;	U27315;X74510;AF240002;BC003791;BC026925;	ENSMUST00000034049;	ADP/ATP translocase 1 (ADP,ATP carrier protein 1) (ADP,ATP carrier protein, heart/skeletal muscle isoform T1) (Adenine nucleotide translocator 1) (ANT 1) (Solute carrier family 25 member 4) (mANC1)	S37210;	NP_031476.3;	Mm.16228;	mmu:11739;	ADP transport; ATP transport; ATP:ADP antiporter activity; L-glutamate uptake involved in synaptic transmission; apoptotic mitochondrial changes; integral to membrane; mitochondrial inner membrane; mitochondrial outer membrane; negative regulation of necrotic cell death	GO:0015866; GO:0015867; GO:0005471; GO:0051935; GO:0008637; GO:0016021; GO:0005743; GO:0005741; GO:0060547		Mitochondrial carrier family	Mitochondrion inner membrane; Multi-pass membrane protein.	0.155947121034148	0.102746836757338	1.51778026415018	0.129703067283313	499	-0.326700773834601	-0.170753652800461	1.17711289214443	3.19784077800709	9.78828651206704	2.99307626821617	17.5286221941841	14896664.4974893	2.12155998892457	13937299.09055	1.96869794970103	7021561.76363437	7079450.1983743	0.0238144256340315	0.102628380776864	0.23204522427192	0.816589357625706	549	-0.326700773834601	-0.302886348200578	1.23047105929057	3.19784077800709	9.78828651206704	3.10326833484992	10.2456527119369	14896664.4974893	2.12155998892457	15224741.542733
AAYIYIR	Q91YT0	Ndufv1	Ndufv1	IPI00130460;	AK075692;BC014818;BC041682;	ENSMUST00000042497;	NADH dehydrogenase [ubiquinone] flavoprotein 1, mitochondrial (EC 1.6.5.3) (EC 1.6.99.3) (Complex I-51kD) (CI-51kD) (NADH-ubiquinone oxidoreductase 51 kDa subunit)	PC7078;	NP_598427.1;	Mm.29842;	mmu:17995;	4 iron, 4 sulfur cluster binding; FMN binding; NAD binding; NADH dehydrogenase (ubiquinone) activity; electron transport chain; metal ion binding; mitochondrial inner membrane; mitochondrial respiratory chain complex I	GO:0051539; GO:0010181; GO:0051287; GO:0008137; GO:0022900; GO:0046872; GO:0005743; GO:0005747		Complex I 51 kDa subunit family	Mitochondrion inner membrane; Peripheral membrane protein; Matrix side.	-0.305156351157892	0.0648859093296414	-4.70296793726969	3.18579794974168e-06	599	1.74019155470482	1.43503520354693	0.814311699321381	2.28187955823652	1.31128067600787	2.26793381560508	1.58040291276444	12373000.8951245	1.19912758682596	10008595.6191125	1.14812342329042	10318335.6225465	8717351.65059932	-0.188347831139872	0.0679898186066549	-2.77023582353604	0.00575938737163565	659	1.74019155470482	1.55184372356496	0.892973214824279	2.28187955823652	1.31128067600787	2.29353686032843	1.47794318815791	12373000.8951245	1.19912758682596	10481043.3747305
AAYNLVR	Q9CQI6	Cotl1 Clp	Cotl1	IPI00132575;	AK010052;AK007994;AK008085;BC011068;BC010249;	ENSMUST00000034285;ENSMUST00000168698;	Coactosin-like protein		NP_082347.1;	Mm.393405;	mmu:72042;	actin binding; cytoplasm; cytoskeleton; defense response to fungus	GO:0003779; GO:0005737; GO:0005856; GO:0050832		Actin-binding proteins ADF family, Coactosin subfamily	Cytoplasm › cytoskeleton.	-0.220423400747958	0.155347281298381	-1.41890735972768	0.159859432947412	79	-0.294367299814419	-0.514790700562377	0.711890675555427	0.991136654022439	3.36700664322189	1.22346245121406	2.37662111976285	874386.566925175	0.651148994293677	929215.717334525	0.703315633368103	1342836.39318779	1321193.03659526	-0.782181038286353	0.168793321809565	-4.63395725554132	1.25082561233477e-05	87	-0.294367299814419	-1.07654833810077	0.809504333658979	0.991136654022439	3.36700664322189	1.05121787291224	0.976470666209733	874386.566925175	0.651148994293677	533987.278823237
AAYQAAIR	Q6NZL6	Tonsl Ikbr Nfkbil2	Tonsl	IPI00467906;	BC066068;AJ294539;AK013272;		Tonsoku-like protein (Inhibitor of kappa B-related protein) (I-kappa-B-related protein) (IkappaBR) (NF-kappa-B inhibitor-like protein 2) (Nuclear factor of kappa light polypeptide gene enhancer in B-cells inhibitor-like 2)		NP_898914.3;	Mm.358749;	mmu:72749;	cytoplasm; double-strand break repair via homologous recombination; histone binding; nuclear replication fork; replication fork processing	GO:0005737; GO:0000724; GO:0042393; GO:0043596; GO:0031297		Tonsoku family	Cytoplasm. Nucleus.	-0.215284042451993	0.322159019829505	-0.668253965280644	0.507907445856686	39	1.71424129896368	1.49895725651168	1.04391453558413	2.40562316140529	1.40331653592734	2.29529787393051	1.53126305900946	12113115.8389246	1.06035303331446	11298397.5986722	1.09570024589703	11423663.1181799	10311577.1315925	-0.0292570252076319	0.259459946646562	-0.112761239589269	0.910744639298223	43	1.71424129896368	1.68498427375604	0.87987148778053	2.40562316140529	1.40331653592734	2.42950757412164	1.44185771461591	12113115.8389246	1.06035303331446	13078405.3199297
AAYQVAALPR	P52760	Hrsp12 Hrp12	Hrsp12	IPI00130640;	U50631;BC092375;BC125590;BC125592;	ENSMUST00000022946;	Ribonuclease UK114 (EC 3.1.-.-) (Heat-responsive protein 12)		NP_032313.2;	Mm.143977;	mmu:15473;	endonuclease activity; mitochondrion; nucleic acid phosphodiester bond hydrolysis; nucleus	GO:0004519; GO:0005739; GO:0090305; GO:0005634		RutC family		-0.889631851563808	0.481772624281216	-1.84658033006981	0.0724065425129223	39	-2.19306353852973	-3.08269539009353	1.56112172677902	2.37066073068579	1.0809813254545	2.57538657598748	0.835433362720065	647122.919259149	1.01311681408179	687559.21963999	1.41047989545971	638744.624770296	487464.74292418	-1.63061127384377	0.391551567740889	-4.16448664284965	0.000147281919762344	43	-2.19306353852973	-3.8236748123735	1.32781596891437	2.37066073068579	1.0809813254545	2.52092835774106	0.659294652773108	647122.919259149	1.01311681408179	259729.255689036
ACACAHGMLAEDGASCR	Q91ZX7	Lrp1 A2mr	Lrp1	IPI00119063;	X67469;AF367720;AF369477;AF369389;AF369390;AF369391;AF369392;AF369393;AF369394;AF369395;AF369396;AF369397;AF369398;AF369399;AF369400;AF369401;AF369402;AF369403;AF369404;AF369405;AF369406;AF369407;AF369408;AF369409;AF369410;AF369411;AF369412;AF369413;AF369414;AF369415;AF369416;AF369417;AF369418;AF369419;AF369420;AF369421;AF369422;AF369423;AF369424;AF369425;AF369426;AF369427;AF369428;AF369429;AF369…	ENSMUST00000049149;	Prolow-density lipoprotein receptor-related protein 1 (LRP-1) (Alpha-2-macroglobulin receptor) (A2MR) (CD antigen CD91) [Cleaved into: Low-density lipoprotein receptor-related protein 1 85 kDa subunit (LRP-85); Low-density lipoprotein receptor-related protein 1 515 kDa subunit (LRP-515); Low-density lipoprotein receptor-related protein 1 intracellular domain (LRPICD)]	S25111;	NP_032538.2;	Mm.271854;	mmu:16971;	aging; aorta morphogenesis; apoptotic cell clearance; beta-amyloid clearance; calcium ion binding; cell proliferation; cholesterol metabolic process; clathrin-coated vesicle; coated pit; dendrite; endosome; integral to plasma membrane; lipoprotein metabolic process; negative regulation of Wnt receptor signaling pathway; negative regulation of platelet-derived growth factor receptor-beta signaling…	GO:0007568; GO:0035909; GO:0043277; GO:0097242; GO:0005509; GO:0008283; GO:0008203; GO:0030136; GO:0005905; GO:0030425; GO:0005768; GO:0005887; GO:0042157; GO:0030178; GO:2000587; GO:0014912; GO:0043025; GO:0005634; GO:0048471; GO:0010875; GO:0051222; GO:0007205; GO:0006898; GO:0032956; GO:0032429		LDLR family	Cell membrane; Single-pass type I membrane protein. Membrane › coated pit. Cell membrane; Peripheral membrane protein; Extracellular side. Membrane › coated pit. Cytoplasm. Nucleus.	0.750745808062982	0.249382455532107	3.01041950389459	0.00331007248309592	99	-3.7847114361513	-3.03396562808832	1.27770487186581	1.71764311558208	0.453837272552743	1.39251180076161	0.4589741518064	142859.701358392	0.883470022118807	172603.109205902	0.711925133802792	161702.941561927	242445.590147846	-0.0251186120802096	0.263179875218374	-0.0954427539695707	0.924138404896065	109	-3.7847114361513	-3.80983004823151	1.41114486967101	1.71764311558208	0.453837272552743	1.96644296482059	0.516149786191485	142859.701358392	0.883470022118807	153451.359663086
ACAGDIANQLATDAVQIFGGYGFNTEYPVEK	Q91WS8	Acadm	Acadm	IPI00134961;	BC013498;		0			Mm.10530;		acyl-CoA dehydrogenase activity; fatty acid beta-oxidation; flavin adenine dinucleotide binding	GO:0003995; GO:0006635; GO:0050660		Acyl-CoA dehydrogenase family		2.60718718168249	0.798996202718821	3.26307831352736	0.00409163184179646	19	-5.96875928979921	-3.36157210811671	1.83073028947064	2.11090504435986	0.353658933434869	0.970926056169194	0.288830947229969	40547.5758905351	1.00258844468992	153798.518640154	0.840794301125497	40442.8917022632	182920.505567507	0.977546766494687	0.909554408714643	1.07475348052694	0.294679266785591	21	-5.96875928979921	-4.99121252330452	2.18103485274087	2.11090504435986	0.353658933434869	2.22921492197051	0.446627930900972	40547.5758905351	1.00258844468992	76507.9430965168
ACCLYNNHQAKDCIDS	F6WYJ5	Naa35	Naa35	IPI00986901;		ENSMUST00000172166;	0										0.159836681931016	0.217759650188218	0.734005045438228	0.471907200968591	19	-0.994341148639533	-0.834504466708517	0.498950040147307	0.468667091151214	0.471334301906794	0.51076146879946	0.612053606871661	558508.626781262	0.720583061104714	417816.635929323	0.470782569308736	775078.761808558	887493.852082959	-1.26811973782803	0.272056313055712	-4.66123988664193	0.000133863118913699	21	-0.994341148639533	-2.26246088646756	0.652368121134409	0.468667091151214	0.471334301906794	0.826601446176606	0.365355021658386	558508.626781262	0.720583061104714	144954.993464922
ACCVPTKLDPISILYLDKGVVTYK	Q9R229	Bmp10	Bmp10	IPI00314523;	AF101033;AF101440;AF101439;BC145983;	ENSMUST00000032125;	Bone morphogenetic protein 10 (BMP-10)		NP_033886.2;	Mm.483321;	mmu:12154;	BMP signaling pathway; Z disc; activin receptor signaling pathway; adult heart development; atrial cardiac muscle tissue morphogenesis; cardiac muscle cell proliferation; cell surface; extracellular space; heart trabecula formation; negative regulation of cardiac muscle hypertrophy; negative regulation of cell growth; negative regulation of cell migration; negative regulation of endothelial cell …	GO:0030509; GO:0030018; GO:0032924; GO:0007512; GO:0055009; GO:0060038; GO:0009986; GO:0005615; GO:0060347; GO:0010614; GO:0030308; GO:0030336; GO:0010596; GO:0060389; GO:0060045; GO:0010613; GO:2000138; GO:0010628; GO:0010862; GO:0045893; GO:0033612; GO:0045214; GO:0055015; GO:0055010		TGF-beta family	Secreted.	0.290342820315325	0.21206778145756	1.36910387009179	0.173175033942631	139	-1.41485386666132	-1.124511046346	1.28559260246517	2.19955240970467	1.55461455174521	1.96057315803551	1.74348946095836	1571627.08972243	1.25923599160541	1416275.01602585	1.10491116899667	1248079.86763366	1281799.89103732	-0.228864967659407	0.194719920239922	-1.17535467032553	0.241678666092665	153	-1.41485386666132	-1.64371883432073	1.2353594033172	2.19955240970467	1.55461455174521	2.19127030560734	1.3331174771827	1571627.08972243	1.25923599160541	1758973.40367858
ACDEGHIIPK	Q9JHI5	Ivd	Ivd	IPI00471246;	AF225989;AF226043;AF226039;AF226041;AF226040;AF226042;AK005024;AK017660;BC018325;BC027198;	ENSMUST00000028807;	Isovaleryl-CoA dehydrogenase, mitochondrial (IVD) (EC 1.3.8.4)		NP_062800.1;	Mm.6635;	mmu:56357;	flavin adenine dinucleotide binding; isovaleryl-CoA dehydrogenase activity; leucine catabolic process; mitochondrial matrix; mitochondrial membrane; mitochondrion	GO:0050660; GO:0008470; GO:0006552; GO:0005759; GO:0031966; GO:0005739	Amino-acid degradation; L-leucine degradation; (S)-3-hydroxy-3-methylglutaryl-CoA from 3-isovaleryl-CoA: step 1/3.	Acyl-CoA dehydrogenase family	Mitochondrion matrix.	0.235438921308777	0.0794612963562076	2.96293833734295	0.00317686298395342	559	1.10364908288377	1.33908800419255	0.963417017669675	2.95048002117078	2.67338601275447	2.82844240430373	2.11221547459776	15462830.2492932	1.42440407558836	16455935.3181133	1.33006035789058	10855648.698496	12372322.2186786	0.201056857811951	0.0750577336087711	2.67869609359555	0.00758857488709571	615	1.10364908288377	1.30470594069573	0.952375872905296	2.95048002117078	2.67338601275447	2.83169379127695	2.17036935523339	15462830.2492932	1.42440407558836	14824443.6586047
ACDGNVDHAATHISNR	P54729	Nub1 Nyren18	Nub1	IPI00108775;	U27462;AF534114;BC037451;	ENSMUST00000068825;	NEDD8 ultimate buster 1 (Negative regulator of ubiquitin-like proteins 1) (Protein BS4)		NP_058016.2;	Mm.5856;	mmu:53312;	nucleus; positive regulation of proteasomal ubiquitin-dependent protein catabolic process; protein ubiquitination; response to interferon-gamma; response to tumor necrosis factor; ubiquitin-dependent protein catabolic process	GO:0005634; GO:0032436; GO:0016567; GO:0034341; GO:0034612; GO:0006511			Nucleus.	-0.107503917931692	0.259501906704816	-0.414270242931116	0.68331563372349	19	-3.46240832609879	-3.56991224403049	0.594593565230093	0.329952870577847	0.0952957708918217	0.847691251964588	0.237454366947556	87372.8589183563	0.641985365313642	72300.0442924309	0.519132934287767	136097.8982374	139270.771544526	-1.23041025078097	0.701195499527651	-1.75473209912188	0.0938861618088897	21	-3.46240832609879	-4.69281857687976	1.68140774031986	0.329952870577847	0.0952957708918217	2.51778724015605	0.536519193936135	87372.8589183563	0.641985365313642	50156.719201379
ACDLGHVWACANASR	Q921H9	Selrc1	Selrc1	IPI00121834;	AK044999;AK081388;AK168344;AL627238;BC012391;	ENSMUST00000131656;	Sel1 repeat-containing protein 1 (Beta-lactamase hcp-like protein)		NP_081526.1;	Mm.28354;	mmu:69893;				Hcp beta-lactamase family		0.231534663867458	0.137202586735493	1.68753861990826	0.0946481153921519	99	-0.759549511032366	-0.528014847164908	0.702954075620451	2.19734645276352	2.89296013077136	2.37677044182773	4.50133259431894	5723554.3387994	2.07117163643547	9755357.79693733	2.10441751195152	2763437.96820709	4635657.01270503	0.388308429968844	0.13076006458027	2.96962555972486	0.00366748733558844	109	-0.759549511032366	-0.371241081063521	0.701122736444767	2.19734645276352	2.89296013077136	1.93060694568791	5.20041300428596	5723554.3387994	2.07117163643547	4652322.18812406
ACEDIDECSLPNICVFGTCHNLPGLFR	Q61554	Fbn1 Fbn-1	Fbn1	IPI00122438;	L29454;U22493;		Fibrillin-1	A55624;		Mm.271644;		calcium ion binding; extracellular matrix structural constituent; microfibril; sequestering of BMP in extracellular matrix; sequestering of TGFbeta in extracellular matrix	GO:0005509; GO:0005201; GO:0001527; GO:0035582; GO:0035583		Fibrillin family	Secreted › extracellular space › extracellular matrix.	0.217176117129504	0.0560275561413275	3.87623755320837	0.000110544849546849	1539	0.15833407601311	0.375510193142615	1.12648832165199	2.01777150984233	12.7437602861639	1.95687660162292	5.2112476235225	3296933.52573127	1.10933024406865	3440135.40430714	0.991547207858023	2972003.64216089	3469462.04582498	-0.0220689702484163	0.0488056591969418	-0.452180558802885	0.651196841013416	1693	0.15833407601311	0.136265105764695	1.02695039883223	2.01777150984233	12.7437602861639	1.82361618129509	13.3828552149231	3296933.52573127	1.10933024406865	3554442.02192874
ACFLRDIPFSAIYFPCYAHVK	Q9QXX4	Slc25a13 Aralar2	Slc25a13	IPI00135651;	AF164632;AK002829;AK012670;	ENSMUST00000015256;	Calcium-binding mitochondrial carrier protein Aralar2 (Citrin) (Mitochondrial aspartate glutamate carrier 2) (Solute carrier family 25 member 13)		NP_001171043.1;NP_056644.1;	Mm.24513;	mmu:50799;	ATP biosynthetic process; L-aspartate transmembrane transporter activity; L-glutamate transmembrane transporter activity; calcium ion binding; integral to membrane; malate-aspartate shuttle; mitochondrial inner membrane; response to calcium ion	GO:0006754; GO:0015183; GO:0005313; GO:0005509; GO:0016021; GO:0043490; GO:0005743; GO:0051592		Mitochondrial carrier family	Mitochondrion inner membrane; Multi-pass membrane protein.	0.244341668169844	0.134666602833988	1.81441918803774	0.0704970214756833	339	-1.10229083831096	-0.857949170141123	1.27222526788973	2.17283543341045	1.97119975771538	2.0849813585794	2.43019217354851	3617589.25678087	2.14047644776444	3657602.78676508	1.7318002129529	1690085.99022856	2112023.52292618	0.25308649536845	0.12241200726746	2.06749730698784	0.0393765138633395	373	-1.10229083831096	-0.849204342942513	1.21027037408902	2.17283543341045	1.97119975771538	2.03123946328576	2.39193249559637	3617589.25678087	2.14047644776444	3687187.80239608
ACFLRDIPFSAIYFPVYAHCK	Q8BH59	Slc25a12 Aralar1	Slc25a12	IPI00308162;	AK030595;AK083156;BX284624;BC060505;	ENSMUST00000151937;	Calcium-binding mitochondrial carrier protein Aralar1 (Mitochondrial aspartate glutamate carrier 1) (Solute carrier family 25 member 12)		NP_766024.1;	Mm.30928;Mm.483680;	mmu:78830;	L-aspartate transmembrane transporter activity; L-glutamate transmembrane transporter activity; calcium ion binding; integral to membrane; malate-aspartate shuttle; mitochondrial inner membrane; response to calcium ion	GO:0015183; GO:0005313; GO:0005509; GO:0016021; GO:0043490; GO:0005743; GO:0051592		Mitochondrial carrier family	Mitochondrion inner membrane; Multi-pass membrane protein.	-0.117482470990554	0.0755885180114333	-1.55423699367652	0.120761872464689	499	-0.173188774249147	-0.290671245239702	0.865975263642315	1.83932875442184	10.6203693766884	1.77327226526188	6.10061123796249	3104318.69863403	1.2997063921344	4633676.14935302	1.86494839000925	2388476.90326126	2484613.6087069	-0.0119655114148776	0.0701151202916103	-0.170655221942325	0.864557747699054	549	-0.173188774249147	-0.185154285664026	0.840650760388419	1.83932875442184	10.6203693766884	1.77776366009885	9.60152585031015	3104318.69863403	1.2997063921344	6104210.93796527
ACGANLPENFSISQIFSQAMAAR	P34914	Ephx2 Eph2	Ephx2	IPI00321617;IPI00407606;	L05781;Z37107;AY098585;BC015087;	ENSMUST00000070515;	Bifunctional epoxide hydrolase 2 [Includes: Cytosolic epoxide hydrolase 2 (CEH) (EC 3.3.2.10) (Epoxide hydratase) (Soluble epoxide hydrolase) (SEH); Lipid-phosphate phosphatase (EC 3.1.3.76)]	A47504;	NP_001258332.1;NP_031966.2;	Mm.15295;	mmu:13850;	10-hydroxy-9-(phosphonooxy)octadecanoate phosphatase activity; Golgi apparatus; aromatic compound catabolic process; cholesterol homeostasis; epoxide hydrolase activity; focal adhesion; lipid phosphatase activity; magnesium ion binding; nucleolus; peroxisome; phospholipid dephosphorylation; positive regulation of gene expression; regulation of cholesterol metabolic process; response to toxin	GO:0033885; GO:0005794; GO:0019439; GO:0042632; GO:0004301; GO:0005925; GO:0042577; GO:0000287; GO:0005730; GO:0005777; GO:0046839; GO:0010628; GO:0090181; GO:0009636		AB hydrolase superfamily, Epoxide hydrolase family	Cytoplasm. Peroxisome.	-0.0725258672690355	0.0683246377551307	-1.06148923217071	0.288961316875633	519	0.944117232139314	0.871591364870279	0.798258705543811	1.91609461384073	2.02950920565127	2.06568640611437	2.37001706232118	5224902.86991974	1.09136035996717	5285702.42577399	1.05464964131834	4787513.8786211	5011808.86874121	0.192816463655526	0.0706684694272268	2.72846525782033	0.00655895378664123	571	0.944117232139314	1.13693369579484	0.864064736806474	1.91609461384073	2.02950920565127	2.07663344177609	1.82652115022793	5224902.86991974	1.09136035996717	5495673.05738105
ACGDSTLTQITAGLDPVGR	P62880	Gnb2	Gnb2	IPI00162780;	U34960;AB045007;AF312033;BC029077;BC059942;BC062178;U38505;	ENSMUST00000031726;ENSMUST00000150063;	Guanine nucleotide-binding protein G(I)/G(S)/G(T) subunit beta-2 (G protein subunit beta-2) (Transducin beta chain 2)		NP_034442.1;	Mm.30141;	mmu:14693;	G-protein coupled receptor signaling pathway; GTPase activity; calcium channel regulator activity; elevation of cytosolic calcium ion concentration; heterotrimeric G-protein complex; perinuclear region of cytoplasm; signal transducer activity	GO:0007186; GO:0003924; GO:0005246; GO:0007204; GO:0005834; GO:0048471; GO:0004871		WD repeat G protein beta family	Cytoplasm › perinuclear region.	0.0909871540336081	0.118444904059543	0.768181246428876	0.443901238959056	119	0.302771874470284	0.39375902850389	0.664770375300177	1.57265534178644	5.19419230910363	1.51092501133603	3.83718188526844	3132390.63779885	1.10270007166855	4038969.15809612	1.24245215856325	2840655.1502795	3250804.57244062	0.11753010191377	0.103312481369603	1.13761764653878	0.25735661263805	131	0.302771874470284	0.420301976384054	0.606823428875886	1.57265534178644	5.19419230910363	1.46469230698423	3.48485705345782	3132390.63779885	1.10270007166855	2472497.39025637
ACGEFVFLMDR	Q99KC8	Vwa5a Loh11cr2a	Vwa5a	IPI00221817;	AY366502;AK019914;AK041397;AK053665;AK054497;AK136934;AK161193;BC004727;BC065153;	ENSMUST00000001544;ENSMUST00000118144;	von Willebrand factor A domain-containing protein 5A (Loss of heterozygosity 11 chromosomal region 2 gene A protein homolog)		NP_001139429.1;NP_766355.3;	Mm.290950;	mmu:67776;						-0.135261068100652	0.127337949171241	-1.06222119156919	0.290719593457321	99	-0.994791373074038	-1.13005244117469	0.652412847897986	1.73791228487541	1.74701181766889	1.66898537924883	1.47690967112457	3197368.41631946	1.83518170829032	2166778.06519411	1.61037735137883	1742262.57916344	1345509.52504324	-0.206445556848003	0.123599165374827	-1.670282774337	0.097732660443426	109	-0.994791373074038	-1.20123692992204	0.662726692037466	1.73791228487541	1.74701181766889	2.02583280790168	1.68645565037128	3197368.41631946	1.83518170829032	4183367.7683381
ACGLIIFR	P56380	Nudt2 Apah1	Nudt2	IPI00135345;	AK009933;AK018771;BC025153;	ENSMUST00000030154;	Bis(5'-nucleosyl)-tetraphosphatase [asymmetrical] (EC 3.6.1.17) (Diadenosine 5',5'''-P1,P4-tetraphosphate asymmetrical hydrolase) (Ap4A hydrolase) (Ap4Aase) (Diadenosine tetraphosphatase) (Nucleoside diphosphate-linked moiety X motif 2) (Nudix motif 2)		NP_079815.2;	Mm.28574;	mmu:66401;	GTP binding; bis(5'-nucleosyl)-tetraphosphatase (asymmetrical) activity; induction of apoptosis; mitochondrion	GO:0005525; GO:0004081; GO:0006917; GO:0005739		Nudix hydrolase family		0.179272199666693	0.108822212126162	1.64738610035657	0.101233038736222	179	-0.502461944957394	-0.323189745290703	0.748029036541018	1.99308615524099	3.96664100683286	1.88786680087159	5.84135737095709	2498288.66286636	1.24970222503114	2931697.3971756	1.30228444540684	1999107.15755036	2251195.89465703	0.105550094051675	0.108307762351239	0.974538590404807	0.330984314146797	197	-0.502461944957394	-0.396911850905721	0.779138671355301	1.99308615524099	3.96664100683286	1.99297135212309	5.02119386855113	2498288.66286636	1.24970222503114	2841965.16138837
ACGLNFADLMGR	Q62465	Vat1 Vat-1	Vat1	IPI00126072;	AK034795;BC024586;BC025496;X95562;	ENSMUST00000040430;	Synaptic vesicle membrane protein VAT-1 homolog (EC 1.-.-.-)		NP_036167.1;	Mm.29210;	mmu:26949;	mitochondrial outer membrane; negative regulation of mitochondrial fusion; nucleotide binding; oxidoreductase activity; zinc ion binding	GO:0005741; GO:0010637; GO:0000166; GO:0016491; GO:0008270		Zinc-containing alcohol dehydrogenase family, Quinone oxidoreductase subfamily	Cytoplasm. Mitochondrion outer membrane; Peripheral membrane protein.	0.11481217108178	0.12336263383114	0.930688390124162	0.354278738263248	99	-0.517385177757625	-0.402573006675845	0.632045417613397	1.17746057324152	2.27579108150082	1.05817821508019	2.62853742683311	1716421.89525694	1.18808967533775	1238140.45382134	0.842299034223848	1444690.52369216	1469953.5479846	-0.0997500652595992	0.112554707411324	-0.886236280594366	0.377441309549545	109	-0.517385177757625	-0.617135243017223	0.603507383644064	1.17746057324152	2.27579108150082	1.23582136890347	2.00251303565398	1716421.89525694	1.18808967533775	1801145.23070647
ACGNFGIPCELR	Q9DCL9	Paics	Paics	IPI00322096;	AK002669;AK010462;AK012118;AK146722;AK159398;AK166264;CH466524;BC018153;BC052691;	ENSMUST00000031160;ENSMUST00000117536;ENSMUST00000120912;	Multifunctional protein ADE2 [Includes: Phosphoribosylaminoimidazole-succinocarboxamide synthase (EC 6.3.2.6) (SAICAR synthetase); Phosphoribosylaminoimidazole carboxylase (EC 4.1.1.21) (AIR carboxylase) (AIRC)]		NP_080215.1;	Mm.182931;Mm.431705;	mmu:67054;	'de novo' IMP biosynthetic process; 5-(carboxyamino)imidazole ribonucleotide mutase activity; ATP binding; phosphoribosylaminoimidazole carboxylase activity; phosphoribosylaminoimidazolesuccinocarboxamide synthase activity	GO:0006189; GO:0034023; GO:0005524; GO:0004638; GO:0004639	Purine metabolism; IMP biosynthesis via de novo pathway; 5-amino-1-(5-phospho-D-ribosyl)imidazole-4-carboxamide from 5-amino-1-(5-phospho-D-ribosyl)imidazole-4-carboxylate: step 1/2. Purine metabolism; IMP biosynthesis via de novo pathway; 5-amino-1-(5-phospho-D-ribosyl)imidazole-4-carboxylate from 5-amino-1-(5-phospho-D-ribosyl)imidazole (carboxylase route): step 1/1.	SAICAR synthetase family; AIR carboxylase family		0.0616391113297945	0.0677249382728368	0.910139055150927	0.363666140745763	239	0.357603300886065	0.41924241221586	0.537550032681379	1.86574197279015	5.21735109314493	2.01617762849987	4.80909748096234	18667339.3043365	2.93004904857439	21486940.9624474	2.68210974425421	6370998.91328409	8011208.71674924	-0.0207821326514356	0.060095541760666	-0.345818209513805	0.72975580084739	263	0.357603300886065	0.33682116823463	0.499191061244138	1.86574197279015	5.21735109314493	1.935149643657	5.74533261611685	18667339.3043365	2.93004904857439	14336449.7874947
ACGPDYYEVEEDGIRK	Q01279	Egfr	Egfr	IPI00121190;	X78987;U03425;X59698;L06864;Z12608;	ENSMUST00000020329;	Epidermal growth factor receptor (EC 2.7.10.1)	A53183;	NP_997538.1;	Mm.420648;Mm.439882;Mm.8534;	mmu:13649;	ATP binding; Golgi membrane; basolateral plasma membrane; cell morphogenesis; cell proliferation; cell-cell adhesion; cerebral cortex cell migration; digestive tract morphogenesis; embryonic placenta development; endocytic vesicle; endoplasmic reticulum membrane; endosome; endosome membrane; epidermal growth factor-activated receptor activity; hair follicle development; integral to membrane; memb…	GO:0005524; GO:0000139; GO:0016323; GO:0000902; GO:0008283; GO:0016337; GO:0021795; GO:0048546; GO:0001892; GO:0030139; GO:0005789; GO:0005768; GO:0010008; GO:0005006; GO:0001942; GO:0016021; GO:0045121; GO:0060571; GO:0043066; GO:0042177; GO:0030235; GO:0031965; GO:0005634; GO:0048471; GO:0045739; GO:0045740; GO:0043406; GO:0035413; GO:0030335; GO:0031659; GO:0050679; GO:0048146; GO:0045429; GO:…		Protein kinase superfamily, Tyr protein kinase family, EGF receptor subfamily	Cell membrane; Single-pass type I membrane protein. Endoplasmic reticulum membrane; Single-pass type I membrane protein. Golgi apparatus membrane; Single-pass type I membrane protein. Nucleus membrane; Single-pass type I membrane protein. Endosome. Endosome membrane.	-0.289906714072174	0.207870191234324	-1.39465265486466	0.166242174403852	99	-0.734540898087332	-1.02444761215951	1.06501780764436	1.74493903438467	2.37555054991261	1.63696869489434	1.59790376341808	3647674.03102152	1.83946147072558	4202991.58075222	2.42479783155182	1983011.92445346	1733336.91001464	0.113374068199862	0.203978419666617	0.555814033588263	0.579477089563601	109	-0.734540898087332	-0.62116682988747	1.09371242841919	1.74493903438467	2.37555054991261	1.59267909049809	2.5640118143247	3647674.03102152	1.83946147072558	4045697.82257618
ACGSVADCTFEELCERPLGASDYLELSK	Q3V384	Lace1	Lace1	IPI00169752;	AF520417;AK044595;BC089595;	ENSMUST00000041024;	Lactation elevated protein 1		NP_665686.2;	Mm.89646;	mmu:215951;	ATP binding; mitochondrion	GO:0005524; GO:0005739		AFG1 ATPase family		-0.241473280670399	0.137438109084937	-1.75696014939471	0.0808494690304297	159	-0.235124743365389	-0.476598024035789	0.890700747058973	2.0048457484648	8.52673231991251	1.899175789866	3.98485871549352	3765814.20101263	1.36649718012781	3599118.43281028	1.49422449684881	2755815.56682057	2408686.53967359	0.192943026042624	0.127366723126248	1.51486213436908	0.131611409210154	175	-0.235124743365389	-0.0421817173227654	0.863843145111568	2.0048457484648	8.52673231991251	2.00118562265648	47.4420139735858	3765814.20101263	1.36649718012781	6929270.64516005
ACIENGTSCIDICGEPQFLELMHAK	Q8R127	Sccpdh	Sccpdh	IPI00153266;	AK042919;AK046033;AK077695;AK082803;AK166018;BC025803;	ENSMUST00000040538;	Saccharopine dehydrogenase-like oxidoreductase (EC 1.-.-.-)		NP_848768.1;	Mm.136458;	mmu:109232;	lipid particle; midbody; mitochondrion; nucleotide binding; oxidoreductase activity	GO:0005811; GO:0030496; GO:0005739; GO:0000166; GO:0016491		Saccharopine dehydrogenase family		0.0746627834116448	0.255060211337387	0.292726109729765	0.770498992869107	79	-0.0745605227895826	0.000102260622063851	1.16883272522501	1.59694570733762	21.4181130656012	1.72850573862079	16902.9456670186	4433577.23996652	1.68816494561176	5223538.57314019	1.73278276686816	2626270.17075033	3014537.46714092	0.166793437879511	0.223763551129768	0.745400388210601	0.458038819331204	87	-0.0745605227895826	0.0922329150899286	1.07313229227654	1.59694570733762	21.4181130656012	1.33807305867921	14.5075438348074	4433577.23996652	1.68816494561176	2241196.423741
ACIPFLKK	Q2TPA8	Hsdl2	Hsdl2	IPI00117214;	AY725196;AK085899;AK136773;AK145230;AL806512;BX005031;BX005031;AL806512;BC002211;	ENSMUST00000030078;	Hydroxysteroid dehydrogenase-like protein 2 (EC 1.-.-.-)		NP_077217.2;	Mm.272905;	mmu:72479;	mitochondrion; nucleotide binding; oxidoreductase activity; peroxisome; sterol binding	GO:0005739; GO:0000166; GO:0016491; GO:0005777; GO:0032934		Short-chain dehydrogenases/reductases (SDR) family	Peroxisome.	0.0838801771845933	0.0751454188040107	1.11623806906132	0.264959966814461	419	0.880242751715108	0.964122928899701	0.789026897442112	1.76251433341767	2.00230485281873	1.65039121205761	1.71180579009889	5092325.04632818	1.10709839888667	5769919.87577065	1.13522894218653	4599704.10168525	5082604.62832933	0.207902969662521	0.0679061603799291	3.0616216334324	0.00233006247544355	461	0.880242751715108	1.08814572137763	0.746195704268335	1.76251433341767	2.00230485281873	1.61645251332831	1.48551106857437	5092325.04632818	1.10709839888667	6078348.76542005
ACIPQSFTVDSSK	Q80X90	Flnb	Flnb	IPI00663627;	AF353669;AF353672;BC003959;BC048835;	ENSMUST00000052678;	Filamin-B (FLN-B) (ABP-280-like protein) (Actin-binding-like protein) (Beta-filamin)			Mm.489652;		Z disc; cell cortex; cytoplasm; focal adhesion; nucleus; plasma membrane; skeletal muscle tissue development; stress fiber	GO:0030018; GO:0005938; GO:0005737; GO:0005925; GO:0005634; GO:0005886; GO:0007519; GO:0001725		Filamin family	Cytoplasm › cell cortex. Cytoplasm › myofibril › sarcomere › Z line. Cytoplasm › cytoskeleton.	0.136468337754941	0.110229776329431	1.23803515074814	0.217161621949374	199	-1.79765515058633	-1.66118681283139	0.79869060871899	1.76748116827507	0.983214810526135	1.67921002093024	1.01084959738401	1807679.37654362	1.86288200264029	1465222.30991412	1.55840745970224	970367.083895581	940204.887234099	-0.107250722324595	0.108473584488951	-0.988726636350062	0.323888032629442	219	-1.79765515058633	-1.90490587291093	0.822541680149519	1.76748116827507	0.983214810526135	1.75960621182168	0.923723443160363	1807679.37654362	1.86288200264029	1612030.08123415
ACLFVPSIDVLNQNPLR	P70428	Ext2	Ext2	IPI00308075;	U72141;U67837;AK164342;AL732493;AL732472;AL732472;AL732493;CH466519;BC006597;	ENSMUST00000028623;	Exostosin-2 (EC 2.4.1.224) (EC 2.4.1.225) (Glucuronosyl-N-acetylglucosaminyl-proteoglycan/N-acetylglucosaminyl-proteoglycan 4-alpha-N-acetylglucosaminyltransferase) (Multiple exostoses protein 2 homolog)		NP_034293.2;	Mm.4336;	mmu:14043;	Golgi membrane; N-acetylglucosaminyl-proteoglycan 4-beta-glucuronosyltransferase activity; cell differentiation; endoplasmic reticulum membrane; glucuronosyl-N-acetylglucosaminyl-proteoglycan 4-alpha-N-acetylglucosaminyltransferase activity; glycosaminoglycan biosynthetic process; heparan sulfate N-acetylglucosaminyltransferase activity; heparan sulfate proteoglycan biosynthetic process; heparan …	GO:0000139; GO:0050509; GO:0030154; GO:0005789; GO:0050508; GO:0006024; GO:0042328; GO:0015012; GO:0015014; GO:0016021; GO:0031227; GO:0001707; GO:0001503; GO:0006486; GO:0042803	Protein modification; protein glycosylation.	Glycosyltransferase 47 family	Endoplasmic reticulum membrane; Single-pass type II membrane protein. Golgi apparatus membrane; Single-pass type II membrane protein.	0.113917977971848	0.190515441241945	0.597946167666155	0.556936736235174	19	-0.77330125805423	-0.659383280082382	0.436525715274563	0.461777974236561	0.597151458667584	0.349780857880285	0.530466677645487	452968.300263678	0.517207171907845	274238.172704167	0.292935265468646	875796.634050518	936173.295029649	0.211533782085302	0.205717884317827	1.02827123070394	0.315521139014853	21	-0.77330125805423	-0.561767475968928	0.493294157260316	0.461777974236561	0.597151458667584	0.523271246832906	0.931473019028693	452968.300263678	0.517207171907845	359714.505754015
ACLGGLPSNAYAAIK	Q9R013	Ctsf	Ctsf	IPI00126769;	AF136280;AF217224;AJ131851;AK075862;BC058758;	ENSMUST00000119694;	Cathepsin F (EC 3.4.22.41)		NP_063914.1;	Mm.29561;	mmu:56464;	cysteine-type peptidase activity; lysosome; proteolysis	GO:0008234; GO:0005764; GO:0006508		Peptidase C1 family	Lysosome.	-0.281323028490292	0.248333191404469	-1.132845057478	0.264196002626581	39	-0.866596420521705	-1.147919449012	0.804691510150226	2.83666214896567	3.27333702493019	3.49775419579575	3.04703801194956	3631962.04668296	1.28827355229684	3508010.48745283	1.08962366061606	2819247.5427347	3219469.81719308	-0.706537825478542	0.204646632824643	-3.4524771589277	0.00125899856813403	43	-0.866596420521705	-1.57313424600025	0.6939904968761	2.83666214896567	3.27333702493019	3.68700438020918	2.34373155983574	3631962.04668296	1.28827355229684	4232743.94208366
ACLISLGYDVENDRQGDAEFNR	P57780	Actn4	Actn4	IPI00118899;	AJ289242;BC013616;BC087554;	ENSMUST00000068045;	Alpha-actinin-4 (F-actin cross-linking protein) (Non-muscle alpha-actinin 4)		NP_068695.1;	Mm.81144;	mmu:60595;	Z disc; actin crosslink formation; actin filament binding; actin filament bundle assembly; calcium ion binding; cortical cytoskeleton; negative regulation of cellular component movement; nucleoside binding; nucleus; perinuclear region of cytoplasm; positive regulation of cellular component movement; positive regulation of pinocytosis; protein complex; protein homodimerization activity; protein tr…	GO:0030018; GO:0051764; GO:0051015; GO:0051017; GO:0005509; GO:0030863; GO:0051271; GO:0001882; GO:0005634; GO:0048471; GO:0051272; GO:0048549; GO:0043234; GO:0042803; GO:0015031; GO:0031143; GO:0042981; GO:0001666; GO:0030529; GO:0001725		Alpha-actinin family	Nucleus. Cytoplasm.	0.0704392112758063	0.0769570615005346	0.915305365126461	0.360882725853076	259	0.436077530872256	0.506516742148064	0.635769667989044	1.03794267959478	2.38017922528283	0.998747964122744	1.97179654889037	2057642.36618299	0.844223893612118	1942989.58505556	0.743651123802558	2437318.32485706	2612770.32047009	-0.068078803870983	0.0694268877067595	-0.980582683736733	0.32763023461744	285	0.436077530872256	0.367998727001272	0.600251557319398	1.03794267959478	2.38017922528283	0.993390096952019	2.69943894927817	2057642.36618299	0.844223893612118	1975589.62385589
ACLISMGYDLGEAEFAR	Q9JI91	Actn2	Actn2	IPI00331664;	AF248643;CH466588;	ENSMUST00000064204;ENSMUST00000168193;	Alpha-actinin-2 (Alpha-actinin skeletal muscle isoform 2) (F-actin cross-linking protein)		NP_150371.4;	Mm.37638;	mmu:11472;	Z disc; actin crosslink formation; actin filament binding; actin filament bundle assembly; calcium ion binding; muscle contraction; protein binding, bridging; protein homodimerization activity; striated muscle thin filament; thyroid hormone receptor coactivator activity	GO:0030018; GO:0051764; GO:0051015; GO:0051017; GO:0005509; GO:0006936; GO:0030674; GO:0042803; GO:0005865; GO:0030375		Alpha-actinin family	Cytoplasm › myofibril › sarcomere › Z line.	0.155618368129905	0.0622925717701549	2.49818499554169	0.0126830282015661	799	0.330661288880191	0.486279657010097	0.90270512601036	2.4262573001876	7.33759100862489	2.11583475836328	4.35106574552706	41120168.2208603	5.93353245021463	5721796.0936929	1.30722648021297	6930132.86198054	4377050.32777543	0.427842197421281	0.0663732809630261	6.44600042688284	1.89140000073161e-10	879	0.330661288880191	0.758503486301474	1.00660064471133	2.4262573001876	7.33759100862489	2.38122726625856	3.13937550619526	41120168.2208603	5.93353245021463	70997998.1926175
ACLYAGVK	P15105	Glul Glns	Glul	IPI00626790;	X16314;U09114;AY044241;AK159106;AK160670;AK162685;AK168493;BC015086;	ENSMUST00000086199;	Glutamine synthetase (GS) (EC 6.3.1.2) (Glutamate decarboxylase) (EC 4.1.1.15) (Glutamate--ammonia ligase)	AJMSQ;	NP_032157.2;	Mm.210745;	mmu:14645;	ATP binding; Golgi apparatus; cell proliferation; glutamate decarboxylase activity; glutamate-ammonia ligase activity; glutamine biosynthetic process; mitochondrion; response to glucose stimulus	GO:0005524; GO:0005794; GO:0008283; GO:0004351; GO:0004356; GO:0006542; GO:0005739; GO:0009749		Glutamine synthetase family	Cytoplasm. Mitochondrion.	0.22943712860347	0.118101605426241	1.94270965052006	0.0536201995188639	179	-0.83035253971061	-0.600915411107139	0.811814319842333	1.09186269000776	1.31493870108267	1.03194798779523	1.71729326411174	866288.806119129	0.841549017506445	878853.306726468	0.728162714960339	1029397.91752831	1206946.31662696	-0.0762191716729907	0.106090210060137	-0.718437371646129	0.473338861707764	197	-0.83035253971061	-0.9065717113836	0.763186160581911	1.09186269000776	1.31493870108267	0.96470007679035	1.06411888290451	866288.806119129	0.841549017506445	673063.201577858
ACNGVNDCGDQSDELCCK	Q61129	Cfi If	Cfi	IPI00320675;	U47810;BC150751;AH007741;	ENSMUST00000077918;	Complement factor I (EC 3.4.21.45) (C3B/C4B inactivator) [Cleaved into: Complement factor I heavy chain; Complement factor I light chain]		NP_031712.2;	Mm.117180;	mmu:12630;	complement activation, classical pathway; extracellular space; innate immune response; membrane; proteolysis; scavenger receptor activity; serine-type endopeptidase activity	GO:0006958; GO:0005615; GO:0045087; GO:0016020; GO:0006508; GO:0005044; GO:0004252		Peptidase S1 family	Secreted › extracellular space.	-0.147457577134855	0.1453591016334	-1.01443649195595	0.311743747538823	179	-1.11674279520549	-1.26420037234035	0.999178629278753	1.42327894795838	1.2744912741492	1.45145098668544	1.14811782882047	1272464.85816281	1.25634271432666	1183135.65920914	1.21886508587769	1012832.60025493	970686.315423648	-0.174178554258458	0.138110350960634	-1.26115496084797	0.208744454522749	197	-1.11674279520549	-1.29092134946395	0.993530962249187	1.42327894795838	1.2744912741492	1.39490518676376	1.08055009497131	1272464.85816281	1.25634271432666	1117339.50524221
ACQIAHDHTDHVIR	Q64462	Cyp4b1	Cyp4b1	IPI00134516;	D50834;BC008996;	ENSMUST00000102707;	Cytochrome P450 4B1 (EC 1.14.14.1) (CYPIVB1)	S66472;	NP_031849.1;	Mm.1840;	mmu:13120;	aromatase activity; biphenyl metabolic process; drug binding; electron carrier activity; endoplasmic reticulum membrane; exogenous drug catabolic process; fluorene metabolic process; fluorene oxygenase activity; heme binding; iron ion binding	GO:0070330; GO:0018879; GO:0008144; GO:0009055; GO:0005789; GO:0042738; GO:0018917; GO:0018585; GO:0020037; GO:0005506		Cytochrome P450 family	Endoplasmic reticulum membrane; Peripheral membrane protein. Microsome membrane; Peripheral membrane protein.	0.25332825677668	0.171623666201021	1.47606832078717	0.156307087568607	19	-2.31968124132988	-2.0663529845532	0.393239220706006	0.32570548641876	0.140409587582832	0.462684191046833	0.223913433235067	185486.197803256	0.624701674220998	158639.404486978	0.422082661416906	296919.642539068	375849.138067968	-0.496679876987016	0.363334403647674	-1.36700480879495	0.186080355665872	21	-2.31968124132988	-2.81636111831689	0.871245293258772	0.32570548641876	0.140409587582832	1.26474540600125	0.449070752246817	185486.197803256	0.624701674220998	114062.539492831
ACQSIYPLHDVFVR	P97351	Rps3a	Rps3a	IPI00331345;	Z83368;AK088113;BC039659;BC081451;BC083338;BC084675;	ENSMUST00000029722;	40S ribosomal protein S3a (Protein TU-11)		NP_058655.3;	Mm.399829;	mmu:20091;	cell differentiation; cytosol; induction of apoptosis; nucleus; ribonucleoprotein complex; ribosome; structural constituent of ribosome; translation	GO:0030154; GO:0005829; GO:0006917; GO:0005634; GO:0030529; GO:0005840; GO:0003735; GO:0006412		Ribosomal protein S3Ae family	Cytoplasm. Nucleus.	0.0758120966057874	0.096319786127705	0.787087468251564	0.433110894770081	99	0.0255243165490419	0.101336413154829	0.493492053119176	1.15130897730317	45.1063586792251	1.04027984539639	10.2656075245822	2225132.25111524	1.09206607173184	1864043.27039123	0.896204019779761	2037543.61454206	2079931.83388009	0.0299729190590764	0.0996210880730767	0.300869219949594	0.764087374045202	109	0.0255243165490419	0.0554972356081185	0.534158575874086	1.15130897730317	45.1063586792251	1.10653263462681	19.9385180631401	2225132.25111524	1.09206607173184	1810225.91404159
ACRDVDECQHSR	P10493	Nid1 Ent	Nid1	IPI00111793;	X14194;X14480;AK041633;AK084876;AK144878;AK166779;BC131669;AH003206;X83093;	ENSMUST00000005532;	Nidogen-1 (NID-1) (Entactin)	MMMSND;	NP_035047.2;	Mm.4691;	mmu:18073;	basal lamina; calcium ion binding; cell periphery; cell-matrix adhesion; collagen binding; glomerular basement membrane development; laminin-1 binding; positive regulation of cell-substrate adhesion	GO:0005605; GO:0005509; GO:0071944; GO:0007160; GO:0005518; GO:0032836; GO:0043237; GO:0010811			Secreted › extracellular space › extracellular matrix › basement membrane.	0.153837492915462	0.0650683064578017	2.3642461482416	0.01832445219973	739	0.0337321151743143	0.18756960808978	0.906880402893283	2.1314266912249	63.1868674766028	1.99190959898885	10.6195754166923	13617535.6368732	3.13378567395589	8602650.04836161	2.24118737942477	4345394.69308482	3838434.09406027	0.280296297650802	0.0584300546454166	4.79712537240952	1.91466608618164e-06	813	0.0337321151743143	0.31402841282512	0.852257980935391	2.1314266912249	63.1868674766028	2.01290080948272	6.40993211847901	13617535.6368732	3.13378567395589	12460589.8715034
ACTGSLNMTLQR	Q8CI51	Pdlim5 Enh	Pdlim5	IPI00415684;IPI00415685;IPI00828969;	AB016586;AB016587;AB016588;AK147999;BC037476;	ENSMUST00000029941;ENSMUST00000168967;	PDZ and LIM domain protein 5 (Enigma homolog) (Enigma-like PDZ and LIM domains protein)		NP_001177781.1;NP_001177783.1;NP_001177784.1;NP_001177785.1;NP_062782.2;	Mm.117709;	mmu:56376;	Z disc; actin cytoskeleton; cell junction; cytosol; metal ion binding; plasma membrane; postsynaptic density; postsynaptic membrane; regulation of dendritic spine morphogenesis; regulation of synapse assembly; zinc ion binding	GO:0030018; GO:0015629; GO:0030054; GO:0005829; GO:0046872; GO:0005886; GO:0014069; GO:0045211; GO:0061001; GO:0051963; GO:0008270			Cell junction › synapse › postsynaptic cell membrane › postsynaptic density. Cell junction › synapse › synaptosome. Cytoplasm.	-0.224851637998727	0.134419201554558	-1.67276427324607	0.096120563487457	179	0.666619720981658	0.441768082982931	0.92397924896893	1.68227868202018	2.52359573092568	1.6669160433144	3.77328310379274	9097796.37460524	1.83410511934126	11134548.5098524	2.49775629183262	4960346.20844023	4457820.22299818	-0.0817824270162473	0.15155044309512	-0.539638323359548	0.59005591020543	197	0.666619720981658	0.584837293965411	1.09021558855138	1.68227868202018	2.52359573092568	2.09179965066197	3.57672069179926	9097796.37460524	1.83410511934126	15955247.0758526
ACTILLR	P80318	Cct3 Cctg	Cct3	IPI00116283;	Z31556;L20509;	ENSMUST00000001452;	T-complex protein 1 subunit gamma (TCP-1-gamma) (CCT-gamma) (Matricin) (mTRiC-P5)	S42723;S43062;	NP_033966.1;	Mm.256034;	mmu:12462;	ATP binding; binding of sperm to zona pellucida; chaperonin-containing T-complex; microtubule; plasma membrane; protein folding; sperm part; zona pellucida receptor complex	GO:0005524; GO:0007339; GO:0005832; GO:0005874; GO:0005886; GO:0006457; GO:0097223; GO:0002199		TCP-1 chaperonin family	Cytoplasm.	-0.147534183591758	0.0689810191282869	-2.13876491614864	0.0333902362638033	259	-0.238733338872022	-0.386267522463779	0.569876743909098	1.18566193239493	4.96646986129797	1.27813945012804	3.30894878755409	1795039.55541793	1.10474868202685	1210221.20964513	0.792060377150485	1624839.73470294	1527940.60220386	0.0690241346489718	0.0653799586364393	1.05573842640062	0.291981851369133	285	-0.238733338872022	-0.169709204223051	0.565262584645281	1.18566193239493	4.96646986129797	1.23617420340671	7.28407282955606	1795039.55541793	1.10474868202685	1824712.65415499
ACVAGTSDAEAVK	Q61595	Ktn1	Ktn1	IPI00122559;IPI00407517;IPI00473546;IPI00759851;IPI00759887;IPI00759913;IPI00759916;IPI00759936;IPI00759943;IPI00759952;IPI00759972;IPI00760003;IPI00760049;IPI00760053;IPI00760076;IPI00760078;	L43326;AK040200;AJ517365;AJ517366;AJ517367;AJ517368;AJ517369;AJ517370;AJ517371;AJ517372;AJ517373;AJ517374;AJ517375;AJ517376;AJ517377;AJ517378;AJ517379;AJ517380;AJ517381;AJ517382;AJ517383;AJ517384;		Kinectin		NP_032503.2;	Mm.3110;	mmu:16709;	endoplasmic reticulum; endoplasmic reticulum membrane; integral to membrane; kinesin binding; microtubule-based movement	GO:0005783; GO:0005789; GO:0016021; GO:0019894; GO:0007018		Kinectin family	Endoplasmic reticulum membrane; Single-pass type II membrane protein.	0.202451640988112	0.386379546747307	0.523970905531693	0.60226165068713	59	-2.2770992638051	-2.07464762281699	1.53339628856284	2.97188637983762	1.30511938020282	2.64548640370568	1.27514975295592	2694057.11125984	1.87438299679493	2249833.17149421	1.77721556562905	1437303.43044431	1265931.50263001	0.323677708301032	0.377857324989059	0.85661355992081	0.39480560179394	65	-2.2770992638051	-1.95342155550407	1.56935933626625	2.97188637983762	1.30511938020282	3.26893929497669	1.67344282946297	2694057.11125984	1.87438299679493	3020765.72747944
ACVDSNENGDLSK	Q64514	Tpp2	Tpp2	IPI00227843;IPI00469194;	X81323;BC058239;	ENSMUST00000087933;	Tripeptidyl-peptidase 2 (TPP-2) (EC 3.4.14.10) (Tripeptidyl aminopeptidase) (Tripeptidyl-peptidase II) (TPP-II)	I48855;	NP_033444.1;	Mm.401675;	mmu:22019;	aminopeptidase activity; cytoplasm; nucleus; peptide binding; proteolysis; serine-type endopeptidase activity; tripeptidyl-peptidase activity	GO:0004177; GO:0005737; GO:0005634; GO:0042277; GO:0006508; GO:0004252; GO:0008240		Peptidase S8 family	Cytoplasm. Nucleus.	0.125017984472081	0.150768915560117	0.829202651008204	0.408649937938052	119	-1.20676333560968	-1.0817453511376	0.846188439902112	1.30906846952977	1.0847764685098	1.79240882069058	1.6569600403696	1177948.77657156	1.25714487944654	4016541.96152853	2.00966585317067	937003.201325654	1998611.83648594	-0.0413329090547975	0.160009999339468	-0.258314538000266	0.796569565255558	131	-1.20676333560968	-1.24809624466448	0.939845942778531	1.30906846952977	1.0847764685098	1.97802549197164	1.58483410268043	1177948.77657156	1.25714487944654	3310284.07639353
ACVVHGSDLKDMTSEELDDILR	Q8VDN2	Atp1a1	Atp1a1	IPI00311682;	BC010319;BC021496;BC023794;BC025618;BC025627;BC025811;BC032187;BC033435;BC033471;BC042435;	ENSMUST00000036493;	Sodium/potassium-transporting ATPase subunit alpha-1 (Na(+)/K(+) ATPase alpha-1 subunit) (EC 3.6.3.9) (Sodium pump subunit alpha-1)		NP_659149.1;	Mm.280103;	mmu:11928;	4-nitrophenylphosphatase activity; ATP binding; ATP biosynthetic process; T-tubule; basolateral plasma membrane; integral to membrane; melanosome; metal ion binding; negative regulation of glucocorticoid biosynthetic process; negative regulation of heart contraction; positive regulation of heart contraction; positive regulation of striated muscle contraction; regulation of blood pressure; regulat…	GO:0003869; GO:0005524; GO:0006754; GO:0030315; GO:0016323; GO:0016021; GO:0042470; GO:0046872; GO:0031947; GO:0045822; GO:0045823; GO:0045989; GO:0008217; GO:0002028; GO:0002026; GO:0042493; GO:0005391		Cation transport ATPase (P-type) (TC 3.A.3) family, Type IIC subfamily	Cell membrane; Multi-pass membrane protein. Melanosome.	0.135711487788724	0.077331204854571	1.75493823022598	0.0796957644154007	719	0.465098471199904	0.600809958988628	1.06312829948462	2.26885041659618	4.87821516751666	2.29098730481106	3.81316466302853	8895000.28382298	1.92628507867738	10962507.6522668	1.9803822092993	4617696.71700434	5535551.47122107	0.118687707558406	0.0760344453705261	1.56097288511838	0.118930125317512	791	0.465098471199904	0.583786178758314	1.0939451698967	2.26885041659618	4.87821516751666	2.30138211923707	3.94216616113111	8895000.28382298	1.92628507867738	13456095.0415928
ACYGVLR	P62908	Rps3	Rps3	IPI00134599;	X76772;BC010721;	ENSMUST00000032998;	40S ribosomal protein S3	S41170;	NP_036182.1;	Mm.236868;	mmu:27050;	DNA-(apurinic or apyrimidinic site) lyase activity; activation of cysteine-type endopeptidase activity involved in apoptotic process; cytoplasm; cytosolic small ribosomal subunit; damaged DNA binding; endonuclease activity; induction of apoptosis; mRNA binding; negative regulation of DNA repair; negative regulation of NF-kappaB transcription factor activity; nucleus; response to DNA damage stimul…	GO:0003906; GO:0006919; GO:0005737; GO:0022627; GO:0003684; GO:0004519; GO:0006917; GO:0003729; GO:0045738; GO:0032088; GO:0005634; GO:0006974; GO:0030529; GO:0032587; GO:0003735; GO:0006412		Ribosomal protein S3P family	Cytoplasm.	0.00288845241280532	0.139375337645366	0.0207242720383921	0.98348868998044	179	-0.377004195388249	-0.374115742975441	0.958047052154876	1.90487585708632	5.05266487850256	1.96585549579453	5.25467193697748	11154618.465353	2.93167450796717	8644537.92386799	2.51931006860139	3804862.52312084	3431311.6244032	0.166515887193174	0.128378448142437	1.29707041643332	0.196123981604312	197	-0.377004195388249	-0.210488308195073	0.9235221127732	1.90487585708632	5.05266487850256	1.67186828430439	7.94280831387065	11154618.465353	2.93167450796717	14075041.1125994
ADAAMGTTVVPGVDSTGDMEPDR	Q8BT18		NA	IPI00108650;	AK014402;AK028180;AK032093;AK049427;BC023359;	ENSMUST00000036972;	Uncharacterized protein C14orf37 homolog		NP_080418.2;	Mm.318710;	mmu:67419;	integral to membrane	GO:0016021			Membrane; Single-pass type I membrane protein.	-0.281917067900167	0.412611489372783	-0.683250649003286	0.502695915272859	19	-6.91819478275841	-7.20011185065858	0.945411691329623	0.885840062642169	0.128044972779585	0.971228779028433	0.134890790472873	6386.45058036671	0.512248023668994	8916.59068156544	0.749383008862973	12467.4967696772	11898.5759966648	-0.329383524106751	0.368128805647091	-0.894750747711159	0.381061416065494	21	-6.91819478275841	-7.24757830686516	0.882741865380891	0.885840062642169	0.128044972779585	0.86080989200832	0.118772071933729	6386.45058036671	0.512248023668994	5146.86161755176
ADAAPTVSIFPPSSEQLTSGGASVVCFLNNFYPK	P01837		NA	IPI00850020;	V00807;		Ig kappa chain C region	K1MS;		Mm.333124;		antigen binding; plasma membrane	GO:0003823; GO:0005886				0.17240241915596	0.131223167752807	1.3138108316416	0.190284467402258	219	-0.21030950596273	-0.0379070868067695	0.997209740152963	2.20983658001469	10.5075449152845	2.1565926743427	56.891543402844	5201955.56718622	1.69731046686169	5090294.47851483	1.46753984659278	3064822.65251365	3468590.30119903	-1.02024764986632	0.154887312528005	-6.58703177951939	2.79185399231449e-10	241	-0.21030950596273	-1.23055715582906	1.23181676136139	2.20983658001469	10.5075449152845	2.71738489874304	2.20825573673762	5201955.56718622	1.69731046686169	3950693.1652996
ADAEVLRK	P48036	Anxa5 Anx5	Anxa5	IPI00317309;	U29396;D63423;AJ230108;AJ230110;AJ230111;AJ230114;AJ230116;AJ230118;AJ230119;AJ230120;AJ230121;AJ230122;AJ230123;AJ230124;AK147740;AK152185;AK153388;AK153476;BC003716;	ENSMUST00000029266;	Annexin A5 (Anchorin CII) (Annexin V) (Annexin-5) (Calphobindin I) (CBP-I) (Endonexin II) (Lipocortin V) (Placental anticoagulant protein 4) (PP4) (Placental anticoagulant protein I) (PAP-I) (Thromboplastin inhibitor) (Vascular anticoagulant-alpha) (VAC-alpha)		NP_033803.1;	Mm.1620;	mmu:11747;	blood coagulation; calcium ion binding; calcium-dependent phospholipid binding; cell projection; cytoplasm; endothelial microparticle; eukaryotic cell surface binding; external side of plasma membrane; intercalated disc; negative regulation of coagulation; positive regulation of apoptotic process; protein homooligomerization; response to organic substance; sarcolemma	GO:0007596; GO:0005509; GO:0005544; GO:0042995; GO:0005737; GO:0072563; GO:0043499; GO:0009897; GO:0014704; GO:0050819; GO:0043065; GO:0051260; GO:0010033; GO:0042383		Annexin family		0.159483619214617	0.0832540129372725	1.9156268099026	0.056206718268335	359	1.02107384013368	1.1805574593483	0.809321504922535	2.06134580729788	2.01880189882056	1.948119809414	1.65016941275304	8077085.48720622	1.32050419146986	8347628.04291734	1.20565297893609	6116667.81475003	6923740.2376624	-0.026829147280898	0.080126224014689	-0.334836036651117	0.737926508078462	395	1.02107384013368	0.994244692852782	0.815163737354156	2.06134580729788	2.01880189882056	2.02436812547397	2.03608642824681	8077085.48720622	1.32050419146986	6374448.8837732
ADAGGELNLAR	Q9QYR9	Acot2 Mte1	Acot2	IPI00136683;	AF180798;AF180796;AF180797;AK172617;CH466590;	ENSMUST00000021649;	Acyl-coenzyme A thioesterase 2, mitochondrial (Acyl-CoA thioesterase 2) (EC 3.1.2.2) (Acyl coenzyme A thioester hydrolase) (MTE-I) (Very-long-chain acyl-CoA thioesterase)		NP_598949.3;	Mm.371675;	mmu:171210;	acyl-CoA hydrolase activity; acyl-CoA metabolic process; carboxylesterase activity; mitochondrial matrix; mitochondrion; palmitoyl-CoA hydrolase activity	GO:0047617; GO:0006637; GO:0004091; GO:0005759; GO:0005739; GO:0016290		C/M/P thioester hydrolase family	Mitochondrion matrix.	0.191995941198631	0.0834524156973225	2.30066367275682	0.0220171968707105	339	1.897961393592	2.08995733479063	0.788393481993855	1.7975574606958	0.947099064693732	1.83033761963079	0.875777504718365	10757748.7110264	1.10914903292803	13880761.4302335	1.17978154032955	9699101.19528945	11765535.3603483	0.355459523385998	0.0727699288210754	4.88470346398155	1.53998104523395e-06	373	1.897961393592	2.253420916978	0.719466096036522	1.7975574606958	0.947099064693732	1.76460565932384	0.783078583334669	10757748.7110264	1.10914903292803	13186027.254075
ADALGAKGEPGGGPAELAPVGPDEK	Q60987	Foxg1 Fkhl1 Foxg1b Hfhbf1	Foxg1	IPI00122768;	U36760;BC046958;	ENSMUST00000021333;ENSMUST00000179669;	Forkhead box protein G1 (FoxG1) (Brain factor 1) (BF-1) (BF1) (Forkhead-related protein FKHL1)		NP_001153584.1;NP_032267.1;	Mm.4704;	mmu:15228;	DNA binding, bending; RNA polymerase II distal enhancer sequence-specific DNA binding transcription factor activity; axon midline choice point recognition; central nervous system neuron development; dorsal/ventral pattern formation; double-stranded DNA binding; embryo development ending in birth or egg hatching; forebrain development; hindbrain development; inner ear morphogenesis; negative regul…	GO:0008301; GO:0003705; GO:0016199; GO:0021954; GO:0009953; GO:0003690; GO:0009792; GO:0030900; GO:0030902; GO:0042472; GO:0045665; GO:0000122; GO:0035058; GO:0043584; GO:0045787; GO:0002052; GO:0045944; GO:0007346; GO:0051090; GO:0043565; GO:0009888; GO:0008134; GO:0005667			Nucleus.	0.41570410014845	0.267975702456326	1.55127534451076	0.137333378796269	19	0.0753659898485458	0.491070089996995	0.61400947045754	0.621844417699778	8.25099516306262	0.549907165001346	1.11981400660079	904035.703915978	0.555171032072007	1353682.51040049	0.597226907692826	1628391.34553174	2266613.39762799	0.183116582190642	0.302288213650681	0.605768183877154	0.551160502674513	21	0.0753659898485458	0.258482572039187	0.724861672075912	0.621844417699778	8.25099516306262	0.830388465040468	3.21255107642064	904035.703915978	0.555171032072007	1696270.09913434
ADASSLTVDVTSPASK	Q99JX3	Gorasp2	Gorasp2	IPI00165716;IPI00461744;	AK033413;AK077683;AK077706;AK148337;AK151843;AK152475;AK152544;AK152603;AK153049;AK169382;BC005600;BC016455;	ENSMUST00000028509;	Golgi reassembly-stacking protein 2 (GRS2) (Golgi reassembly-stacking protein of 55 kDa) (GRASP55)		NP_081628.3;	Mm.271950;Mm.470827;	mmu:70231;	Golgi medial cisterna; Golgi membrane; Golgi organization; organelle organization	GO:0005797; GO:0000139; GO:0007030; GO:0006996		GORASP family	Golgi apparatus membrane; Lipid-anchor. Membrane; Peripheral membrane protein.	-0.236630131965189	0.175666957343574	-1.34703837046817	0.181819231222688	79	-1.64682863831588	-1.88345877028107	0.805007129129507	1.12494707302226	0.683099046767054	1.23058690731842	0.65336546078722	566294.253036012	0.940525257763936	341984.798953598	0.670395001118427	602104.247984105	510124.32727431	-0.177842374423738	0.18087945455349	-0.983209369260601	0.328230811780221	87	-1.64682863831588	-1.82467101273962	0.867467390067237	1.12494707302226	0.683099046767054	1.36368368931687	0.747358663449907	566294.253036012	0.940525257763936	1030687.02286725
ADAVQDSEMVELVELEIR	Q8BFR5	Tufm	Tufm	IPI00274407;IPI00460132;	AK075857;AK084724;AK153135;AK152858;BC060959;BC100596;	ENSMUST00000098048;ENSMUST00000106392;	Elongation factor Tu, mitochondrial		NP_001157185.1;NP_766333.1;	Mm.197829;	mmu:233870;	GTP binding; GTP catabolic process; GTPase activity; mitochondrial inner membrane; translation elongation factor activity	GO:0005525; GO:0006184; GO:0003924; GO:0005743; GO:0003746		GTP-binding elongation factor family, EF-Tu/EF-1A subfamily	Mitochondrion.	-0.23046401516696	0.0778154072309779	-2.9616758861504	0.00317698584932767	619	1.47670256855661	1.24623855338965	0.992718449415848	1.86998977749163	1.26632797782659	1.92701291854999	1.54626328427146	6980506.61682042	1.023251050617	7069151.16072806	1.09022172820562	6821890.49560351	6484140.77415523	0.160469950513465	0.0782888188191434	2.04971735343421	0.040774504608336	681	1.47670256855661	1.63717251907007	1.04523636267651	1.86998977749163	1.26632797782659	1.97215453440496	1.20461008930516	6980506.61682042	1.023251050617	8772891.54663144
ADCLLSLLCKIVWASGW	Q8BP73	Dnajb4	Dnajb4	IPI00223426;	AK077587;		0			Mm.458538;Mm.46746;							0.990593159555245	0.454638551460701	2.17885869197098	0.042136265904988	19	1.95949496757073	2.95008812712597	1.04170778795687	1.10441333597498	0.563621419933612	0.829146163747384	0.28105809996773	5056083.7143549	0.755958243362254	4070812.18314152	0.346476010744449	6688310.84090982	11749189.1412477	0.286267316205334	0.545420198916589	0.524856462547536	0.605180257070512	21	1.95949496757073	2.24576228377606	1.30787169170784	1.10441333597498	0.563621419933612	1.51559360756409	0.674868225596762	5056083.7143549	0.755958243362254	4362042.47922134
ADCTITMADSDLLALMTGK	P32020	Scp2 Scp-2	Scp2	IPI00134131;IPI00648476;	M91458;AK002425;AL844206;AL844206;BC018384;BC034613;M62361;X91150;	ENSMUST00000030340;ENSMUST00000106701;	Non-specific lipid-transfer protein (NSL-TP) (EC 2.3.1.176) (Propanoyl-CoA C-acyltransferase) (SCP-chi) (SCPX) (Sterol carrier protein 2) (SCP-2) (Sterol carrier protein X) (SCP-X)	A40015;JU0157;	NP_035457.1;	Mm.379011;	mmu:20280;	acyl-CoA metabolic process; lipid transport; mitochondrion; nucleus; peroxisome; peroxisome organization; propanoyl-CoA C-acyltransferase activity; propionyl-CoA C2-trimethyltridecanoyltransferase activity; sterol binding	GO:0006637; GO:0006869; GO:0005739; GO:0005634; GO:0005777; GO:0007031; GO:0033814; GO:0050632; GO:0032934		Thiolase family	Cytoplasm. Mitochondrion. Peroxisome.	0.0866160258630081	0.102996023216389	0.840964759202718	0.401284947067204	219	0.0555780834922358	0.142194109355244	0.782702012969863	1.64619949495687	29.6195800847801	1.7595755279291	12.3744614731765	2507956.07290629	1.03177735085096	2958424.96608713	1.02496750521253	2430714.40833417	2886359.76364313	-0.0680888842987623	0.0971396504506412	-0.700938123442803	0.484017841381943	241	0.0555780834922358	-0.0125108008065264	0.772550363647447	1.64619949495687	29.6195800847801	1.82967743608888	146.24782732808	2507956.07290629	1.03177735085096	3197868.50629886
ADDAPAMAAGFPFALRAYLGYQATPSGSSGSLSTSSSSSPPGTPSPADAK	P28033	Cebpb	Cebpb	IPI00116613;	M61007;X62600;	ENSMUST00000070642;	CCAAT/enhancer-binding protein beta (C/EBP beta) (AGP/EBP) (Interleukin-6-dependent-binding protein) (IL-6DBP) (Liver-enriched transcriptional activator) (LAP)	A36366;	NP_034013.1;	Mm.439656;	mmu:12608;	RNA polymerase II core promoter proximal region sequence-specific DNA binding transcription factor activity involved in positive regulation of transcription; RNA polymerase II distal enhancer sequence-specific DNA binding transcription factor activity; brown fat cell differentiation; cellular response to amino acid stimulus; cytoplasm; embryonic placenta development; induction of apoptosis; mamma…	GO:0001077; GO:0003705; GO:0050873; GO:0071230; GO:0005737; GO:0001892; GO:0006917; GO:0060644; GO:0033598; GO:0043066; GO:0045892; GO:0030182; GO:0000790; GO:0016363; GO:0005654; GO:0045669; GO:0046982; GO:0042803; GO:0045408; GO:0034976; GO:0032496; GO:0043565		BZIP family, C/EBP subfamily	Nucleus.	0.225768972897538	0.953886973508684	0.236683149227934	0.815435610459302	19	-3.62373578361793	-3.39796681072039	2.18562963026794	2.3694090097631	0.653858104245527	1.6145809798739	0.475160903508532	301447.835057692	1.13957256164175	275525.108436855	1.22182943414573	264527.108851589	225502.10425197	0.67000376301564	0.836489477180493	0.80097094021312	0.43211793416873	21	-3.62373578361793	-2.95373202060228	2.00583130179079	2.3694090097631	0.653858104245527	1.32009669295818	0.446925003267224	301447.835057692	1.13957256164175	250761.302587374
ADDDYDEPTDSLDAR	Q8K0E8	Fgb	Fgb	IPI00279079;	BC031715;AF413205;	ENSMUST00000048246;	Fibrinogen beta chain [Cleaved into: Fibrinopeptide B; Fibrinogen beta chain]		NP_862897.1;	Mm.30063;	mmu:110135;	cell cortex; eukaryotic cell surface binding; external side of plasma membrane; fibrinogen complex; platelet activation; platelet alpha granule; protein polymerization; response to calcium ion; signal transduction	GO:0005938; GO:0043499; GO:0009897; GO:0005577; GO:0030168; GO:0031091; GO:0051258; GO:0051592; GO:0007165			Secreted.	-0.517549065510569	0.0692890246516533	-7.46942344927668	2.98254420035599e-13	579	0.316387064359623	-0.201162001150945	0.854954689258596	1.81852579187001	5.74778806317749	2.08745886010015	10.3770038484246	6727982.38728594	1.88870746894494	4389405.88811612	1.53960866702303	3562215.16455605	2850988.03490333	-0.0148114765288178	0.0604347061902564	-0.245082295629755	0.806471642968738	637	0.316387064359623	0.301575587830804	0.780403729826083	1.81852579187001	5.74778806317749	1.89902672972187	6.29701741902032	6727982.38728594	1.88870746894494	4786057.66551357
ADDFSCEQEEAFLLAEEEIPLGEVTK	P97432	Nbr1 M17s2	Nbr1	IPI00125341;	U73039;AF227188;	ENSMUST00000103098;ENSMUST00000103099;ENSMUST00000107218;	Next to BRCA1 gene 1 protein (Membrane component chromosome 17 surface marker 2 homolog) (Neighbor of BRCA1 gene 1 protein)		NP_001239149.1;NP_032702.1;	Mm.489817;Mm.784;	mmu:17966;	M band; autophagic vacuole; cytoplasmic vesicle; cytosol; late endosome; lysosome; macroautophagy; metal ion binding; mitogen-activated protein kinase binding; negative regulation of osteoblast differentiation; pre-autophagosomal structure; protein oligomerization; regulation of bone mineralization; regulation of stress-activated MAPK cascade; ubiquitin binding; zinc ion binding	GO:0031430; GO:0005776; GO:0031410; GO:0005829; GO:0005770; GO:0005764; GO:0016236; GO:0046872; GO:0051019; GO:0045668; GO:0000407; GO:0051259; GO:0030500; GO:0032872; GO:0043130; GO:0008270			Cytoplasm. Cytoplasmic vesicle › autophagosome. Lysosome. Cytoplasm › myofibril › sarcomere › M line.	0.219062047179785	0.41013467408774	0.534122231111142	0.599451470892103	19	-0.402795193515843	-0.183733146336058	0.939736594566556	0.964118189146329	2.39356924974927	0.817095538634914	4.44718634023934	749497.700582312	0.607481277508793	688399.438181949	0.493053013419481	1233779.09465113	1396197.60846339	-0.214964633108909	0.389509624089761	-0.551885293235709	0.586852680256889	21	-0.402795193515843	-0.617759826624752	0.934011266921682	0.964118189146329	2.39356924974927	0.87266834514077	1.41263369278763	749497.700582312	0.607481277508793	502859.647911146
ADDGRPFPQIIK	A6ZI47	Aldoart2	Aldoart2	IPI00133580;	EF662062;	ENSMUST00000080123;	0			Mm.392781;		fructose-bisphosphate aldolase activity; glycolysis	GO:0004332; GO:0006096	Carbohydrate degradation; glycolysis; D-glyceraldehyde 3-phosphate and glycerone phosphate from D-glucose: step 4/4.	Class I fructose-bisphosphate aldolase family		0.896973784579254	0.318263670553217	2.81833544815248	0.00655971506443789	59	0.232222752210572	1.12919653678983	1.26306978544561	1.44493871568252	6.2222099339013	1.50565350740084	1.33338480799918	4052565.57370023	1.39460511842368	4760900.27802567	0.933795377257887	2905887.49472026	5098440.61555131	0.384805174258357	0.417793805750197	0.921040879405559	0.360434970888919	65	0.232222752210572	0.617027926468929	1.73522799831197	1.44493871568252	6.2222099339013	2.26965964744673	3.67837426813941	4052565.57370023	1.39460511842368	3082420.54562326
ADDKIYFGGLPTLR	Q60675	Lama2	Lama2	IPI00309999;	U12147;X69869;S75315;		Laminin subunit alpha-2 (Laminin M chain) (Laminin-12 subunit alpha) (Laminin-2 subunit alpha) (Laminin-4 subunit alpha) (Merosin heavy chain)	S53868;		Mm.256087;		cell adhesion; laminin-1 complex; regulation of cell adhesion; regulation of cell migration; regulation of embryonic development	GO:0007155; GO:0005606; GO:0030155; GO:0030334; GO:0045995			Secreted › extracellular space › extracellular matrix › basement membrane.	0.152500203159512	0.0298274595451096	5.11274528522544	3.49458466045077e-07	1899	-0.266802936165495	-0.114302733005983	0.666128046834039	1.69793709332942	6.36401202225228	1.57857521371346	13.8104765494176	4550521.11886895	2.04075300502163	4412727.87970005	1.78878611667973	2229824.53421438	2466884.01623486	0.276184837283368	0.0293183514231128	9.4202035202307	1.14936510934722e-20	2089	-0.266802936165495	0.0093819011178712	0.685228268611922	1.69793709332942	6.36401202225228	1.57481226364686	167.856412454302	4550521.11886895	2.04075300502163	3715943.94508386
ADDKLISEEGVDSLTVK	Q9Z2I0	Letm1	Letm1	IPI00131177;	AF061026;BC023862;BC046326;BC055865;BC061115;AB041582;	ENSMUST00000005431;	LETM1 and EF-hand domain-containing protein 1, mitochondrial (Leucine zipper-EF-hand-containing transmembrane protein 1)		NP_062668.1;	Mm.260538;	mmu:56384;	calcium ion binding; cristae formation; integral to membrane; mitochondrial inner membrane	GO:0005509; GO:0042407; GO:0016021; GO:0005743			Mitochondrion inner membrane; Single-pass membrane protein.	-0.149044559304726	0.086700722151869	-1.71906941032916	0.0867109002330874	279	-0.161974637055664	-0.311019196360388	0.743303853610141	1.72805647475178	10.668685580434	1.81808581692664	5.8455742867394	3553779.99083779	1.40547187155484	3892662.37637353	1.49845429841952	2528531.56492298	2597785.18469284	0.000462146403368504	0.0831758148319481	0.00555625940427808	0.995570377937115	307	-0.161974637055664	-0.161512490652292	0.74626831764665	1.72805647475178	10.668685580434	1.87763424834359	11.6253191363744	3553779.99083779	1.40547187155484	4006354.90082416
ADDKVLPGQQYVYVLHANEPSPGEGDSNCVTR	Q61147	Cp	Cp	IPI00117831;	U49430;BC062957;	ENSMUST00000091309;	Ceruloplasmin (EC 1.16.3.1) (Ferroxidase)		NP_001036076.1;NP_031778.2;	Mm.13787;	mmu:12870;	copper ion binding; copper ion transport; extracellular space; ferroxidase activity	GO:0005507; GO:0006825; GO:0005615; GO:0004322		Multicopper oxidase family	Secreted.	0.208910947701465	0.0879898791527002	2.37426110494953	0.0178785581237868	639	-0.283583272508175	-0.0746723248067157	1.14047918174579	2.30632413826915	8.13279329866916	2.18864529985582	29.3099927653382	2634390.66815326	1.13009145324424	2954364.26216075	1.06186596470469	2331130.51212848	2782238.39953508	-0.57994550473499	0.0820919479233909	-7.06458452266476	3.8837642678491e-12	703	-0.283583272508175	-0.863528777243162	1.11354935954795	2.30632413826915	8.13279329866916	2.36443371840035	2.73810645425028	2634390.66815326	1.13009145324424	1678698.9864653
ADDLECTPGFQR	Q9WTR5	Cdh13	Cdh13	IPI00123746;	AB022100;AK039438;AK048724;AK134649;CH466525;	ENSMUST00000117160;	Cadherin-13 (Heart cadherin) (H-cadherin) (Truncated cadherin) (T-cad) (T-cadherin)		NP_062681.2;	Mm.334841;	mmu:12554;	adiponectin binding; anchored to membrane; calcium ion binding; external side of plasma membrane; homophilic cell adhesion; mitotic cell cycle; perinuclear region of cytoplasm; protein homodimerization activity; regulation of cell growth; response to organic substance	GO:0055100; GO:0031225; GO:0005509; GO:0009897; GO:0007156; GO:0000278; GO:0048471; GO:0042803; GO:0001558; GO:0010033			Cell membrane; Lipid-anchor › GPI-anchor.	0.0881812805256394	0.0641837908093754	1.37388707356871	0.170763906220399	239	0.422961285551905	0.511142566077545	0.509443046049001	1.60316492105367	3.79033489781876	1.66657239058919	3.26048445422633	3283764.20188934	1.03630551002917	3267242.75481718	0.917003129445095	3168722.12886035	3562957.03897356	-0.00168083630253965	0.0765734024616756	-0.0219506545158535	0.98250396246071	263	0.422961285551905	0.421280449249365	0.636066452152984	1.60316492105367	3.79033489781876	1.7268757829349	4.09911209032329	3283764.20188934	1.03630551002917	2785786.01034482
ADDTFEALR	P62869	Tceb2	Tceb2	IPI00131224;	AK019358;AK002223;AK002868;AK003277;AK008477;AK008534;AK012254;AK019181;AK019218;BC051927;BC056983;	ENSMUST00000069579;	Transcription elongation factor B polypeptide 2 (Elongin 18 kDa subunit) (Elongin-B) (EloB) (RNA polymerase II transcription factor SIII subunit B) (SIII p18)		NP_080581.1;	Mm.153758;	mmu:67673;	nucleus; protein ubiquitination; regulation of transcription, DNA-dependent; transcription, DNA-dependent	GO:0005634; GO:0016567; GO:0006355; GO:0006351	Protein modification; protein ubiquitination.		Nucleus.	-0.221877130141757	0.123659031769336	-1.79426546502183	0.0758231289602826	99	0.406180254157911	0.184303124016154	0.633564005153308	1.20651461398515	2.97039208980377	1.45207966778125	7.87875775591291	2286122.06625663	0.88710447130026	2324653.15005272	0.910677088361332	2577060.69602578	2552664.58304742	-0.245101762044929	0.111144471854983	-2.20525373825814	0.0295362194589537	109	0.406180254157911	0.161078492112983	0.595945837881088	1.20651461398515	2.97039208980377	1.34308573333649	8.33808235797512	2286122.06625663	0.88710447130026	1798480.57445407
ADDVVWVR	Q922B2	Dars	Dars	IPI00122743;	AK151027;AK151897;AK152304;AK152562;AK153256;AK153299;AK169716;BC008638;	ENSMUST00000027602;	Aspartate--tRNA ligase, cytoplasmic (EC 6.1.1.12) (Aspartyl-tRNA synthetase) (AspRS)		NP_803228.2;	Mm.28693;	mmu:226414;	ATP binding; aspartate-tRNA ligase activity; aspartyl-tRNA aminoacylation; cytoplasm; nucleic acid binding	GO:0005524; GO:0004815; GO:0006422; GO:0005737; GO:0003676		Class-II aminoacyl-tRNA synthetase family	Cytoplasm.	-0.0503458717221224	0.0919882427543382	-0.547307679923564	0.584638655831266	259	-0.632882707082156	-0.683228578804278	0.759947604735596	1.79247000593168	2.83223097403892	2.02087158091487	2.95782647800186	1451310.75882148	0.997029518156505	1719988.06528902	1.00853158784387	1455634.69525449	1705437.97142355	0.0164312459121795	0.0816995424561302	0.201117967349725	0.840749791661783	285	-0.632882707082156	-0.616451461169978	0.706358576790989	1.79247000593168	2.83223097403892	1.54965529711775	2.51383181763673	1451310.75882148	0.997029518156505	1300418.40030069
ADEGISFR	P35700	Prdx1 Msp23 Paga Tdpx2	Prdx1	IPI00121788;	D16142;D21252;AF157331;AF157329;AF157330;AB023564;AK002287;AK008711;AK010688;AK083243;AK145138;AK150797;AK151459;AK167624;AK169154;BC083348;BC086648;	ENSMUST00000106470;ENSMUST00000135573;	Peroxiredoxin-1 (EC 1.11.1.15) (Macrophage 23 kDa stress protein) (Osteoblast-specific factor 3) (OSF-3) (Thioredoxin peroxidase 2) (Thioredoxin-dependent peroxide reductase 2)	A48513;	NP_035164.1;	Mm.30929;	mmu:18477;	cell proliferation; erythrocyte homeostasis; hydrogen peroxide catabolic process; melanosome; mitochondrion; natural killer cell mediated cytotoxicity; nucleus; regulation of NF-kappaB import into nucleus; regulation of stress-activated MAPK cascade; removal of superoxide radicals; thioredoxin peroxidase activity	GO:0008283; GO:0034101; GO:0042744; GO:0042470; GO:0005739; GO:0042267; GO:0005634; GO:0042345; GO:0032872; GO:0019430; GO:0008379		AhpC/TSA family	Cytoplasm. Melanosome.	0.0673532818971091	0.061515773835934	1.09489449123641	0.274191840319079	419	1.81660000046392	1.88395328236103	0.645915625277307	1.58521791636609	0.872629041044403	1.63633003201013	0.868561894464511	10319556.9596582	1.25002157941154	12334777.7256106	1.30604977750195	8255503.04860833	9444339.67073065	-0.088581604796497	0.0574628028046519	-1.54154688725566	0.123869858963346	461	1.81660000046392	1.72801839566742	0.631437506820415	1.58521791636609	0.872629041044403	1.69314174032085	0.97981696523948	10319556.9596582	1.25002157941154	9284881.10203528
ADFAQACQDAGVR	Q05920	Pc Pcx	Pc	IPI00943457;	L09192;BC055030;		Pyruvate carboxylase, mitochondrial (EC 6.4.1.1) (Pyruvic carboxylase) (PCB)	A47255;		Mm.1845;		ATP binding; biotin carboxylase activity; gluconeogenesis; lipid metabolic process; metal ion binding; mitochondrial matrix; pyruvate carboxylase activity	GO:0005524; GO:0004075; GO:0006094; GO:0006629; GO:0046872; GO:0005759; GO:0004736	Carbohydrate biosynthesis; gluconeogenesis.		Mitochondrion matrix.	-0.0623303960424853	0.0574769971218659	-1.08444071826385	0.278620778601189	579	0.313317815215848	0.250987419173363	0.709206522402239	1.54810109454003	4.94099288121721	1.49915657151833	5.97303473001103	5092112.91940125	1.62901610050423	4269397.40669297	1.4112312769876	3125882.49915091	3025299.59214508	-0.050226350317254	0.0523683396443834	-0.959097627656807	0.337873448966518	637	0.313317815215848	0.263091464898593	0.676241354671546	1.54810109454003	4.94099288121721	1.53931021339665	5.85085576223449	5092112.91940125	1.62901610050423	4193583.58345986
ADFDNTVAIHPTSSEELVTLR	P47791	Gsr Gr1	Gsr	IPI00111359;IPI00760002;	X76341;AK040136;AK084328;BC056357;BC057325;	ENSMUST00000033992;	Glutathione reductase, mitochondrial (GR) (GRase) (EC 1.8.1.7)	PC4370;S39494;	NP_034474.4;	Mm.283573;	mmu:14782;	NADP binding; cell redox homeostasis; cytosol; flavin adenine dinucleotide binding; glutathione binding; glutathione metabolic process; glutathione-disulfide reductase activity; mitochondrion; spermatogenesis	GO:0050661; GO:0045454; GO:0005829; GO:0050660; GO:0043295; GO:0006749; GO:0004362; GO:0005739; GO:0007283		Class-I pyridine nucleotide-disulfide oxidoreductase family	Mitochondrion. Cytoplasm.	-0.0510530669801044	0.0957296436014431	-0.533304680341825	0.595319913026773	79	0.573517037691969	0.522463970711863	0.438688338054758	0.853865295775306	1.48882289393103	0.964918711464412	1.84686172742151	2040998.46073102	0.806414204919309	2490123.99186688	0.911189974120353	2530955.49195496	2732826.37275592	0.00171798939979713	0.114777306399086	0.0149680233287894	0.988091963288647	87	0.573517037691969	0.575235027091765	0.550452624189661	0.853865295775306	1.48882289393103	1.09499027253018	1.90355284528857	2040998.46073102	0.806414204919309	2042578.49918589
ADFSGMSSK	Q60854	Serpinb6 Serpinb6a Spi3	Serpinb6	IPI00121471;	U25844;BC006766;BC057950;	ENSMUST00000043552;ENSMUST00000076532;ENSMUST00000167163;	Serpin B6 (Placental thrombin inhibitor) (Proteinase inhibitor 6) (PI-6)	A57488;	NP_001157590.1;NP_001230121.1;NP_033280.1;	Mm.252210;Mm.374799;Mm.486427;	mmu:20719;	cytoplasm; gonad development; regulation of proteolysis; serine-type endopeptidase inhibitor activity	GO:0005737; GO:0008406; GO:0030162; GO:0004867		Serpin family, Ov-serpin subfamily	Cytoplasm.	0.328185806769246	0.0985481227765624	3.33020860796445	0.000952987429503645	379	0.336955068208278	0.665140874977525	0.984248605359817	2.76261780799549	8.19877208758252	2.77208866924398	4.16767150167647	57367266.4404094	6.97321536432931	13119451.2929454	1.86436315103806	8226802.62162346	7036961.27315143	-0.0283006112499594	0.0918469879435242	-0.308127809998094	0.75813893488093	417	0.336955068208278	0.308654456958317	0.960009744469838	2.76261780799549	8.19877208758252	2.55911309648837	8.29119113233467	57367266.4404094	6.97321536432931	5903360.66144401
ADFSGMTSK	O08799	Spi16	Spi16	IPI00115684;	U96702;		0					serine-type endopeptidase inhibitor activity	GO:0004867		Serpin family		1.20545276666969	0.526057831340822	2.29148335953333	0.0335323608423837	19	-2.5199462766565	-1.31449350998682	1.20534991602182	1.20907614309797	0.479802349081104	1.10176725517384	0.838168653403916	411522.995712966	1.09621233608049	519621.484542242	0.676527234623407	375404.456023884	768071.790681852	0.646749447833424	0.466168087969769	1.38737392053178	0.179876355753816	21	-2.5199462766565	-1.87319682882308	1.11783180572392	1.20907614309797	0.479802349081104	0.957525142192841	0.511171665176504	411522.995712966	1.09621233608049	352198.194731526
ADFSNEK	P56375	Acyp2 Acyp	Acyp2	IPI00880375;	AK046238;AK009134;AL844147;AL732595;AL732595;AL844147;BC027642;	ENSMUST00000074613;	Acylphosphatase-2 (EC 3.6.1.7) (Acylphosphatase, muscle type isozyme) (Acylphosphate phosphohydrolase 2)		NP_083620.1;	Mm.390319;	mmu:75572;	acylphosphatase activity; mitochondrion	GO:0003998; GO:0005739		Acylphosphatase family		0.247386164829634	0.0916946535649009	2.69793445104774	0.00757622732269904	199	-0.370473245562058	-0.123087080732428	0.664390885210151	1.81596852816198	4.90175350019381	1.9029372133667	15.4600889227635	2051817.54453169	1.06514341568902	2587918.66291919	1.02594084791004	1926329.83907093	2522483.30709425	0.195101466301963	0.106280984258497	1.83571377008926	0.0677559326284608	219	-0.370473245562058	-0.175371779260096	0.805915465703389	1.81596852816198	4.90175350019381	2.13314041932479	12.1635329716368	2051817.54453169	1.06514341568902	2653527.50227842
ADGEYWLGLQNLHLLTLK	Q9D1H9	Mfap4	Mfap4	IPI00133751;IPI00551169;	AK003537;AL604029;AL604029;BC022666;	ENSMUST00000040522;ENSMUST00000064783;	Microfibril-associated glycoprotein 4		NP_083844.1;	Mm.272278;	mmu:76293;	cell adhesion; proteinaceous extracellular matrix; signal transduction	GO:0007155; GO:0005578; GO:0007165			Secreted › extracellular space › extracellular matrix.	0.705361777477347	0.338699043338975	2.08256206018099	0.0438974949878758	39	-0.296540288498535	0.408821488978811	1.09751033733935	1.56310900928285	5.27115225117403	1.47782599453845	3.61484421533195	2021681.6110514	1.10508980754998	3934626.50968546	1.19223414588444	1829427.43407753	3300212.90135641	0.283326188876469	0.290850497348476	0.974129979007766	0.335440412338693	43	-0.296540288498535	-0.0132140996220662	0.986322024386731	1.56310900928285	5.27115225117403	1.31295859813671	99.3604283067615	2021681.6110514	1.10508980754998	2397973.52130507
ADGIVPETWTDGPKDTSVEDALER	Q9CQ06	Mrpl24	Mrpl24	IPI00162769;	AK003362;AK008117;AK008961;AK013394;AK019976;AK020157;AK167623;BC004736;BC025506;BC031730;	ENSMUST00000019854;ENSMUST00000119968;ENSMUST00000121048;ENSMUST00000121920;	39S ribosomal protein L24, mitochondrial (L24mt) (MRP-L24)		NP_080867.2;	Mm.393802;	mmu:67707;	mitochondrion; ribosome; structural constituent of ribosome; translation	GO:0005739; GO:0005840; GO:0003735; GO:0006412		Ribosomal protein L24P family	Mitochondrion.	-0.44390761199631	0.492891529587092	-0.9006192749309	0.379065050427946	19	-3.2299741766966	-3.67388178869291	1.12935637186771	0.930547342759775	0.288097455847612	1.33463053677641	0.363275307573584	134708.78399202	0.715251788615125	147331.45289974	0.853636074867168	188337.57026018	172592.814710492	0.586717516144836	0.357853755607116	1.63954550413881	0.115995265168955	21	-3.2299741766966	-2.64325666055176	0.858103160938227	0.930547342759775	0.288097455847612	0.730985870034707	0.276547442760295	134708.78399202	0.715251788615125	177599.392624425
ADGLAILGVLMK	P13634	Ca1 Car1	Ca1	IPI00230320;	M32452;L36655;M28197;L36650;L36651;L36652;L36653;L36654;AK003066;AK146372;AK162331;AK167969;AK172076;CH466577;BC110681;BC132432;BC132434;BC011223;	ENSMUST00000094365;	Carbonic anhydrase 1 (EC 4.2.1.1) (Carbonate dehydratase I) (Carbonic anhydrase I) (CA-I)	A26344;	NP_001077426.1;NP_033929.2;	Mm.273195;	mmu:12346;	carbonate dehydratase activity; cytoplasm; metal ion binding; one-carbon metabolic process; zinc ion binding	GO:0004089; GO:0005737; GO:0046872; GO:0006730; GO:0008270		Alpha-carbonic anhydrase family	Cytoplasm.	-0.720665778600909	0.118276982586439	-6.09303486478644	3.6675716343231e-09	279	1.34908907526696	0.62842329666605	1.01401389478489	2.2828046758196	1.69210819186856	2.45470872990669	3.90613897181972	10056367.5237639	1.20792274787444	6732995.47227462	1.18667644088038	8325339.96189731	5673825.85541134	-0.723258358647841	0.104263773272462	-6.9368135829673	2.38105821918707e-11	307	1.34908907526696	0.625830716619118	0.935473260210799	2.2828046758196	1.69210819186856	2.40923856549385	3.84966493576588	10056367.5237639	1.20792274787444	4889964.73572589
ADGSTQVIDTK	O08749	Dld	Dld	IPI00874456;	U73445;AK117104;AK136193;AK153399;AK168875;BC003368;	ENSMUST00000110857;	Dihydrolipoyl dehydrogenase, mitochondrial (EC 1.8.1.4) (Dihydrolipoamide dehydrogenase)		NP_031887.2;	Mm.3131;	mmu:13382;	2-oxoglutarate metabolic process; NAD binding; acetyl-CoA biosynthetic process from pyruvate; acrosomal matrix; aging; cell redox homeostasis; dihydrolipoamide metabolic process; dihydrolipoyl dehydrogenase activity; flagellum; flavin adenine dinucleotide binding; gastrulation; lipoamide binding; lipoate metabolic process; mitochondrial electron transport, NADH to ubiquinone; mitochondrial matrix…	GO:0006103; GO:0051287; GO:0006086; GO:0043159; GO:0007568; GO:0045454; GO:0051068; GO:0004148; GO:0019861; GO:0050660; GO:0007369; GO:0043544; GO:0009106; GO:0006120; GO:0005759; GO:0005739; GO:0045252; GO:0006508; GO:0045254; GO:0042391; GO:0048240		Class-I pyridine nucleotide-disulfide oxidoreductase family	Mitochondrion matrix.	-0.0753060422466841	0.0546390289752176	-1.37824634989103	0.168503632618562	819	1.65769007039276	1.58238402814608	0.801631090747541	2.56899496816576	1.54974383574433	2.69169266623694	1.70103629609465	16152313.3139849	1.29127582525792	14814545.1820251	1.16843349181983	12508801.7587247	12678980.2635249	0.192779119606643	0.0487817988457037	3.95186574026105	8.36099125139469e-05	901	1.65769007039276	1.8504691899994	0.749003180300525	2.56899496816576	1.54974383574433	2.64238163183357	1.42795224374118	16152313.3139849	1.29127582525792	17607664.804043
ADHGEPIGR	P11499	Hsp90ab1 Hsp84 Hsp84-1 Hspcb	Hsp90ab1	IPI00554929;	M36829;M18186;AK146809;U89426;S46109;	ENSMUST00000024739;	Heat shock protein HSP 90-beta (Heat shock 84 kDa) (HSP 84) (HSP84) (Tumor-specific transplantation 84 kDa antigen) (TSTA)	HHMS84;I57523;	NP_032328.2;	Mm.2180;	mmu:15516;	ATP binding; CTP binding; GTP binding; TPR domain binding; UTP binding; apical plasma membrane; basolateral plasma membrane; brush border membrane; cellular response to interleukin-4; cellular response to organic cyclic compound; cytosol; dATP binding; melanosome; mitochondrion; negative regulation of proteasomal ubiquitin-dependent protein catabolic process; nitric-oxide synthase regulator activ…	GO:0005524; GO:0002135; GO:0005525; GO:0030911; GO:0002134; GO:0016324; GO:0016323; GO:0031526; GO:0071353; GO:0071407; GO:0005829; GO:0032564; GO:0042470; GO:0005739; GO:0032435; GO:0030235; GO:0001890; GO:0045429; GO:0006457; GO:0060334; GO:0060338; GO:0009651; GO:0008180		Heat shock protein 90 family	Cytoplasm. Melanosome.	0.229852330025281	0.098683699902837	2.32918232951938	0.0201702776982323	619	0.931265515463219	1.1611178454885	1.25894258009054	2.74472144763372	2.9473027853592	2.53623404859982	2.18430373665714	11597298.3683974	1.39716715611692	11447405.5397365	1.2714688930949	8300580.44066052	9003291.8633756	0.301097858007609	0.0990736695871077	3.03913097458126	0.00246348661263206	681	0.931265515463219	1.23236337347083	1.32273552722093	2.74472144763372	2.9473027853592	2.62984732794064	2.1339869267081	11597298.3683974	1.39716715611692	10937355.9663194
ADHQPLTEASYVNLPTIALCNTDSPLR	P14206	Rpsa Lamr1 P40-8	Rpsa	IPI00123604;	J02870;X06406;AF140348;DQ360291;DQ360292;AK010423;AK010985;AK011041;AK011043;AK075778;AK075790;AK082935;AK088954;AK134224;AK135488;AK160551;AK160625;AK165219;AK166697;AK166874;AK167132;BC003829;BC037195;BC055886;BC081461;BC084677;BC092041;BC094902;BC099601;BC110285;	ENSMUST00000035105;	40S ribosomal protein SA (37 kDa laminin receptor precursor) (37LRP) (37 kDa oncofetal antigen) (37/67 kDa laminin receptor) (LRP/LR) (67 kDa laminin receptor) (67LR) (Laminin receptor 1) (LamR) (Laminin-binding protein precursor p40) (LBP/p40) (OFA/iLRP)	A29395;	NP_035159.3;XP_003086186.1;	Mm.311972;Mm.391708;Mm.4071;	mmu:100505031;mmu:16785;	90S preribosome; cytosolic small ribosomal subunit; endonucleolytic cleavage in ITS1 to separate SSU-rRNA from 5.8S rRNA and LSU-rRNA from tricistronic rRNA transcript (SSU-rRNA, 5.8S rRNA, LSU-rRNA); endonucleolytic cleavage to generate mature 3'-end of SSU-rRNA from (SSU-rRNA, 5.8S rRNA, LSU-rRNA); laminin binding; nucleus; plasma membrane; rRNA export from nucleus; ribosomal small subunit asse…	GO:0030686; GO:0022627; GO:0000447; GO:0000461; GO:0043236; GO:0005634; GO:0005886; GO:0006407; GO:0000028; GO:0003735; GO:0006412		Ribosomal protein S2P family	Cell membrane. Cytoplasm. Nucleus.	-0.0438564722370799	0.12502612266505	-0.350778471748446	0.72628560789165	139	0.180904139061414	0.137047666824335	0.757930588552218	1.19629250291382	6.61285313382296	1.17521036850305	8.57519427900525	2462790.84769892	1.08747067063267	1859756.39808089	0.838092478541276	2264696.34005495	2219034.82694159	0.0326128707533235	0.110279567141014	0.295729042095545	0.767837994809615	153	0.180904139061414	0.213517009814739	0.699645419397985	1.19629250291382	6.61285313382296	1.06669637876781	4.99583794140495	2462790.84769892	1.08747067063267	2101296.67433758
ADIDVSGPKVDIDVPDVNIEGPEGK	E9Q616	Ahnak	Ahnak	IPI00553798;		ENSMUST00000092956;	0		NP_033773.1;	Mm.203866;Mm.392302;	mmu:66395;	cell-cell junction	GO:0005911				0.13363275079868	0.0801958956281935	1.66632905277636	0.0966950838778978	299	-0.402814043595928	-0.269181292797248	0.711667975220283	1.62105827829829	4.02433406697312	1.73636238137434	6.45053139960287	3103387.28781672	1.53753445806862	3505005.98746885	1.44096637669993	2018418.04034432	2432399.56472541	-0.0237493071872451	0.0669969171025506	-0.354483582444437	0.723203605841374	329	-0.402814043595928	-0.426563350783174	0.622206252164402	1.62105827829829	4.02433406697312	1.54476286458126	3.62141487716903	3103387.28781672	1.53753445806862	2761619.99800382
ADIHLLICTIDDLIDKLSTVVP	Q6PE15	Abhd10	Abhd10	IPI00226414;IPI00404935;	AK052670;AK084998;AK166025;BC027656;BC058347;	ENSMUST00000066983;	Mycophenolic acid acyl-glucuronide esterase, mitochondrial (EC 3.1.1.93) (Alpha/beta hydrolase domain-containing protein 10) (Abhydrolase domain-containing protein 10)		NP_766099.3;	Mm.247453;	mmu:213012;	cytosol; glucuronoside catabolic process; hydrolase activity, hydrolyzing O-glycosyl compounds; mitochondrion; proteolysis; serine-type peptidase activity	GO:0005829; GO:0019391; GO:0004553; GO:0005739; GO:0006508; GO:0008236		AB hydrolase superfamily	Mitochondrion.	0.161571826221243	0.172269479822949	0.937901631718515	0.351153577571978	79	-2.11101607208875	-1.9494442458675	0.78943793121933	2.0913214104092	0.990670529732129	2.39509152268436	1.22860221715063	459656.596965212	0.802344925128297	576192.635777734	0.765467040003665	572891.511579901	752733.436798238	-0.241657120300594	0.179760558545466	-1.34432782283257	0.182337270116885	87	-2.11101607208875	-2.35267319238935	0.862101353320649	2.0913214104092	0.990670529732129	2.2061727261874	0.937730209756349	459656.596965212	0.802344925128297	304629.010617497
ADIIFQEGIER	Q9Z1S0	Bub1b Mad3l	Bub1b	IPI00353560;	AF107296;AL845470;AL929381;AL929381;AL845470;	ENSMUST00000038341;	Mitotic checkpoint serine/threonine-protein kinase BUB1 beta (EC 2.7.11.1) (MAD3/BUB1-related protein kinase) (BubR1) (Mitotic checkpoint kinase MAD3L)		NP_033903.2;	Mm.29133;	mmu:12236;	ATP binding; apoptotic process; cell division; condensed chromosome outer kinetochore; condensed nuclear chromosome kinetochore; mitotic metaphase/anaphase transition; perinuclear region of cytoplasm; protein localization to chromosome, centromeric region; protein localization to kinetochore; protein serine/threonine kinase activity	GO:0005524; GO:0006915; GO:0051301; GO:0000940; GO:0000778; GO:0007091; GO:0048471; GO:0071459; GO:0034501; GO:0004674		Protein kinase superfamily, Ser/Thr protein kinase family, BUB1 subfamily	Cytoplasm. Nucleus. Chromosome › centromere › kinetochore.	0.957482152695593	0.717627461424751	1.33423287731303	0.197899563410249	19	3.23367523022094	4.19115738291654	1.64429108137896	1.99845808550594	0.618014470602663	0.275684149604133	0.0657775703503383	15092077.5630972	0.727604225696856	5949393.9191222	0.224311112724846	20742152.1619709	26522956.6509265	0.549186199732746	0.718870640532346	0.763956919044652	0.453391608437895	21	3.23367523022094	3.78286142995369	1.72379123952451	1.99845808550594	0.618014470602663	1.22078885056869	0.322715720143002	15092077.5630972	0.727604225696856	8025406.17695147
ADIKAPEDK	Q91VR2	Atp5c1	Atp5c1	IPI00313475;	BC010700;	ENSMUST00000114897;	ATP synthase subunit gamma, mitochondrial (F-ATPase gamma subunit)		NP_065640.2;	Mm.12677;	mmu:11949;	ATP synthesis coupled proton transport; hydrogen ion transporting ATP synthase activity, rotational mechanism; mitochondrial proton-transporting ATP synthase complex; proton-transporting ATP synthase complex, catalytic core F(1); proton-transporting ATPase activity, rotational mechanism	GO:0015986; GO:0046933; GO:0005753; GO:0045261; GO:0046961		ATPase gamma chain family	Mitochondrion. Mitochondrion inner membrane; Peripheral membrane protein.	-0.158021820760144	0.0905860235427007	-1.74443931392634	0.0816982086899139	499	0.676137378570738	0.518115557810594	1.03779327447369	3.0681149084515	4.53770935565946	2.88806249785196	5.57416671689241	25325681.1394156	1.9696324460628	22662301.1620685	1.98555894818826	12858074.7083246	11413562.5047783	-0.169868612434552	0.104874854816234	-1.61972679468499	0.105865223595626	549	0.676137378570738	0.506268766136185	1.25740533682635	3.0681149084515	4.53770935565946	3.29594827826552	6.51027378880197	25325681.1394156	1.9696324460628	28225083.4597409
ADIVENQVMDTR	P10649	Gstm1	Gstm1	IPI00230212;	J03952;J04632;AL671877;AC079042;BC003822;BC046758;BC091763;	ENSMUST00000004140;	Glutathione S-transferase Mu 1 (EC 2.5.1.18) (GST 1-1) (GST class-mu 1) (Glutathione S-transferase GT8.7) (pmGT10)	H24735;S30373;S33860;	NP_034488.1;	Mm.37199;	mmu:14862;	cellular response to drug; cytoplasm; glutathione transferase activity; protein heterodimerization activity; protein homodimerization activity	GO:0035690; GO:0005737; GO:0004364; GO:0046982; GO:0042803		GST superfamily, Mu family	Cytoplasm.	0.518876296452385	0.104886306558161	4.94703563772321	1.18865763386179e-06	339	0.834000202420868	1.35287649887325	0.990884203289956	3.28855055450576	3.94310522342803	3.087774988681	2.28237757936713	23775995.8789158	1.80284182566251	27484503.0908242	1.63277832872922	13188065.3868114	16832966.6110985	0.114131883240146	0.109904449483175	1.03846462792772	0.299726495950049	373	0.834000202420868	0.948132085661021	1.0866099017511	3.28855055450576	3.94310522342803	3.21042737651085	3.38605498649758	23775995.8789158	1.80284182566251	19149606.5333772
ADKDYHFKVDNDENEHQLSLR	Q61937	Npm1	Npm1	IPI00127415;	M33212;AK028253;BC054755;	ENSMUST00000075641;	Nucleophosmin (NPM) (Nucleolar phosphoprotein B23) (Nucleolar protein NO38) (Numatrin)	I52858;	NP_032748.1;	Mm.485384;	mmu:18148;	DNA binding; DNA repair; NF-kappaB binding; cell aging; cell growth; cell volume homeostasis; centrosome; centrosome cycle; cytosol; granular component; large ribosomal subunit; negative regulation of cell proliferation; negative regulation of mRNA splicing, via spliceosome; nuclear speck; positive regulation of cell proliferation; positive regulation of cellular biosynthetic process; positive re…	GO:0003677; GO:0006281; GO:0051059; GO:0007569; GO:0016049; GO:0006884; GO:0005813; GO:0007098; GO:0005829; GO:0001652; GO:0015934; GO:0008285; GO:0048025; GO:0016607; GO:0008284; GO:0031328; GO:0010825; GO:0045860; GO:0008104; GO:0051259; GO:0019843; GO:0006407; GO:0043516; GO:0046599; GO:0032071; GO:0060699; GO:0043023; GO:0042273; GO:0000055; GO:0043024; GO:0042274; GO:0000056; GO:0015935; GO:…		Nucleoplasmin family	Nucleus › nucleolus. Nucleus › nucleoplasm. Cytoplasm › cytoskeleton › centrosome.	-0.316763343746151	0.342912873274262	-0.923742934237418	0.359382748257926	59	2.41084718755928	2.09408384381313	1.36089327606946	3.11910974181698	1.29378160420642	2.9194158451975	1.39412557611901	60456479.4316844	1.64262334850134	31900837.3288941	1.3382243882706	36804833.8572823	23838182.6011405	-0.0280737459295147	0.308391550470623	-0.0910327986829487	0.927746487515402	65	2.41084718755928	2.38277344162977	1.28084630613079	3.11910974181698	1.29378160420642	2.62611433201664	1.10212506406838	60456479.4316844	1.64262334850134	25231866.9864581
ADKDYSVTANSK	P16125	Ldhb Ldh-2 Ldh2	Ldhb	IPI00229510;	X51905;AK002257;AK019391;AK131637;BC046755;	ENSMUST00000032373;	L-lactate dehydrogenase B chain (LDH-B) (EC 1.1.1.27) (LDH heart subunit) (LDH-H)	S09954;	NP_032518.1;	Mm.9745;	mmu:16832;	L-lactate dehydrogenase activity; NAD binding; NAD metabolic process; cellular carbohydrate metabolic process; glycolysis; lactate metabolic process; mitochondrion	GO:0004459; GO:0051287; GO:0019674; GO:0044262; GO:0006096; GO:0006089; GO:0005739	Fermentation; pyruvate fermentation to lactate; (S)-lactate from pyruvate: step 1/1.	LDH/MDH superfamily, LDH family	Cytoplasm.	0.160055652256108	0.0590379644991449	2.71106318813593	0.00687632824831639	679	2.5943618423861	2.75441749464221	0.788770184222317	2.81786662857164	1.08615019791533	2.77508851954376	1.00750468109564	66775931.1085487	1.86349839474432	68761384.8472874	1.73483546131393	35833640.2633236	39635680.9510965	0.123487514417539	0.056066626956427	2.20251370772686	0.0279337876923317	747	2.5943618423861	2.71784935680364	0.783930948293285	2.81786662857164	1.08615019791533	2.82972077198446	1.04116174242725	66775931.1085487	1.86349839474432	61349114.6671375
ADKSGNYYVLNGSK	Q9DBL1	Acadsb	Acadsb	IPI00119842;	AK004889;	ENSMUST00000015829;	Short/branched chain specific acyl-CoA dehydrogenase, mitochondrial (SBCAD) (EC 1.3.8.5) (2-methyl branched chain acyl-CoA dehydrogenase) (2-MEBCAD) (2-methylbutyryl-coenzyme A dehydrogenase) (2-methylbutyryl-CoA dehydrogenase)		NP_080102.1;	Mm.334274;Mm.487956;	mmu:66885;	acyl-CoA metabolic process; electron carrier activity; fatty acid metabolic process; flavin adenine dinucleotide binding; mitochondrial matrix; mitochondrion; short-branched-chain-acyl-CoA dehydrogenase activity	GO:0006637; GO:0009055; GO:0006631; GO:0050660; GO:0005759; GO:0005739; GO:0016937	Lipid metabolism; mitochondrial fatty acid beta-oxidation.	Acyl-CoA dehydrogenase family	Mitochondrion matrix.	0.157018440990396	0.121191514315659	1.29562240291363	0.196176500898056	279	0.602507257332448	0.759525698322846	1.03900079929999	2.16567336858765	3.59443532377683	1.67080698077422	2.19980309351432	3676915.23126823	0.989509682491718	3707363.82354126	0.940546505158402	3715896.16183367	3941712.40146907	0.182930056175573	0.110343792702809	1.65781918216516	0.0983753863514662	307	0.602507257332448	0.785437313508024	0.990024284215929	2.16567336858765	3.59443532377683	1.69152145622622	2.15360465709392	3676915.23126823	0.989509682491718	3839930.30517119
ADLAEEYSK	P68037	Ube2l3 Ubce7	Ube2l3	IPI00128760;	S81004;X97042;AJ130961;AK007265;	ENSMUST00000090192;ENSMUST00000115699;	Ubiquitin-conjugating enzyme E2 L3 (EC 6.3.2.19) (UbcM4) (Ubiquitin carrier protein L3) (Ubiquitin-protein ligase L3)	JC6163;	NP_033482.1;XP_003689395.1;	Mm.3074;	mmu:100042355;mmu:22195;	ATP binding; cell proliferation; cellular response to glucocorticoid stimulus; cytoplasm; nucleus; protein K11-linked ubiquitination; regulation of S phase of mitotic cell cycle; regulation of transcription, DNA-dependent; transcription coactivator activity; transcription, DNA-dependent; ubiquitin-protein ligase activity	GO:0005524; GO:0008283; GO:0071385; GO:0005737; GO:0005634; GO:0070979; GO:0007090; GO:0006355; GO:0003713; GO:0006351; GO:0004842	Protein modification; protein ubiquitination.	Ubiquitin-conjugating enzyme family	Nucleus. Cytoplasm.	-0.0500620684010967	0.17601466939066	-0.284419864403376	0.776458716703842	159	0.206638058501966	0.156575990100868	1.14070543143686	1.76057072654305	8.52007001665814	1.87162847531732	11.9534832518804	7704828.04263245	1.95725870748932	8386633.06312016	1.97110635470089	3936540.43440983	4254784.65082257	-0.026236323273112	0.16818102867224	-0.156000492328077	0.876212440790556	175	0.206638058501966	0.180401735228853	1.14065923335659	1.76057072654305	8.52007001665814	1.78837740859576	9.91330491542709	7704828.04263245	1.95725870748932	9987963.71979915
ADLAQGNNSGAYAKLKK	Q8CHY7	Ttc23	Ttc23	IPI00229786;IPI00881922;	AK005431;BC038179;	ENSMUST00000032774;	Tetratricopeptide repeat protein 23 (TPR repeat protein 23)		NP_001161947.1;NP_001161948.1;NP_080181.2;	Mm.249356;	mmu:67009;						-0.617089180928275	0.390660498021075	-1.57960475669845	0.130701640305217	19	-2.36140585636429	-2.97849503729257	0.895115651605362	1.00844605067925	0.427053252180841	0.555085874818006	0.186364545808536	199267.390901356	0.636909012510043	44987.0155583137	0.242709156335104	312866.338813527	185353.598675944	-0.589382373691755	0.428758625465659	-1.37462511232666	0.183739783681756	21	-2.36140585636429	-2.95078823005605	1.02812706595022	1.00844605067925	0.427053252180841	1.0336951194144	0.350311523167071	199267.390901356	0.636909012510043	121780.763586155
ADLFDPVIK	Q6P8J7	Ckmt2	Ckmt2	IPI00120076;	BC061221;	ENSMUST00000022122;	Creatine kinase S-type, mitochondrial (EC 2.7.3.2) (Basic-type mitochondrial creatine kinase) (Mib-CK) (Sarcomeric mitochondrial creatine kinase) (S-MtCK)		NP_940807.1;	Mm.316438;	mmu:76722;	ATP binding; creatine kinase activity; mitochondrial inner membrane; mitochondrion; phosphocreatine metabolic process	GO:0005524; GO:0004111; GO:0005743; GO:0005739; GO:0006603		ATP:guanido phosphotransferase family	Mitochondrion inner membrane; Peripheral membrane protein; Intermembrane side.	-0.0855566884395261	0.074588795508733	-1.14704477872295	0.251724563524869	759	2.26788745039877	2.18233076195925	1.05352548088833	3.42281286208307	1.50925164363039	3.16892097772459	1.4520809736832	53868762.256078	1.86236400126055	48571993.5168008	1.79730320704139	28924937.4556299	27024930.0877602	-0.07050730687437	0.0700374973193771	-1.0067079717719	0.314366764977685	835	2.26788745039877	2.19738014352441	1.03527646076854	3.42281286208307	1.50925164363039	3.45903531439014	1.57416336203082	53868762.256078	1.86236400126055	52165615.8966256
ADLIAYLK	P62897	Cycs	Cycs	IPI00222419;	X01756;AK088098;BC034363;	ENSMUST00000073080;ENSMUST00000161401;	Cytochrome c, somatic	CCMS;	NP_031834.1;	Mm.35389;	mmu:13063;	apoptotic process; electron carrier activity; electron transport chain; heme binding; iron ion binding; mitochondrial intermembrane space; respiratory chain	GO:0006915; GO:0009055; GO:0022900; GO:0020037; GO:0005506; GO:0005758; GO:0070469		Cytochrome c family	Mitochondrion intermembrane space.	-0.0414766398691929	0.0825368056704334	-0.502522959693978	0.615669611599639	299	1.67765824993395	1.63618161006476	0.73244149108271	2.27951491326818	1.35874807241459	2.37251993510281	1.45003459304796	19298811.9575149	1.55196297996942	17409793.9998037	1.36607486638474	12435098.134812	12744392.293724	-0.0547024440827286	0.0825891486274831	-0.66234420613128	0.508214349612996	329	1.67765824993395	1.62295580585122	0.767012675498148	2.27951491326818	1.35874807241459	2.52584569687854	1.55632438528033	19298811.9575149	1.55196297996942	19120530.347437
ADLPGSSSTFTK	Q3UTJ2	Sorbs2 Argbp2 Kiaa0777	Sorbs2	IPI00405462;IPI00673886;IPI00900398;IPI00900438;IPI00900461;IPI00900464;IPI00923680;	AK041051;AK049030;AK079130;AK083429;AK139388;AK140498;BC039163;AK122369;	ENSMUST00000125295;ENSMUST00000134675;ENSMUST00000138049;ENSMUST00000139869;ENSMUST00000141039;ENSMUST00000153798;	Sorbin and SH3 domain-containing protein 2 (Arg/Abl-interacting protein 2) (ArgBP2)			Mm.211096;Mm.441720;Mm.447653;		Z disc; cytoskeleton; focal adhesion; perinuclear region of cytoplasm; zinc ion binding	GO:0030018; GO:0005856; GO:0005925; GO:0048471; GO:0008270			Cytoplasm › perinuclear region. Cytoplasm › myofibril › sarcomere › Z line. Cell junction › focal adhesion. Cytoplasm › cytoskeleton.	0.0114958160460201	0.0900194830086451	0.127703644386805	0.898512460488937	199	-0.336696531324814	-0.325200715278793	0.652253121387737	1.71089908440794	5.08142771081126	1.62528930882685	4.99780361009814	6721283.4475024	2.21175616503971	4801228.57097925	1.89960384727801	3038889.88928476	2527489.39093751	0.062610363241109	0.106614452758095	0.587259622137439	0.557634311493166	219	-0.336696531324814	-0.274086168083705	0.808444115800356	1.71089908440794	5.08142771081126	1.73919118162083	6.34541755164269	6721283.4475024	2.21175616503971	4908445.41749746
ADLSNCLYK	Q0II04	Nebl Lnebl	Nebl	IPI00606309;	AL772218;BC122879;	ENSMUST00000132418;	Nebulette (Actin-binding Z-disk protein)			Mm.120298;Mm.256298;Mm.404039;Mm.440498;		Z disc; cardiac muscle thin filament assembly; stress fiber	GO:0030018; GO:0071691; GO:0001725			Cytoplasm.	-0.158756815135482	0.0935260105882526	-1.69746163807208	0.0905847107290253	319	-0.996291568891283	-1.15504838402677	0.857180045935818	2.40498223864024	2.41393414712584	2.43531999943938	2.1084138405954	13962912.9952171	3.03046816106863	12920368.7026621	3.00717784698347	4607510.2106644	4296509.67122637	0.0161769051637035	0.103794304755791	0.155855421949835	0.876236579323419	351	-0.996291568891283	-0.980114663727581	0.995559997376295	2.40498223864024	2.41393414712584	2.54146172786648	2.59302489996504	13962912.9952171	3.03046816106863	12872426.7750828
ADLYLEGK	Q8BIJ6	Iars2	Iars2	IPI00453499;	AK166832;AK036182;AK048653;AK050358;BC052403;	ENSMUST00000027921;	Isoleucine--tRNA ligase, mitochondrial (EC 6.1.1.5) (Isoleucyl-tRNA synthetase) (IleRS)		NP_941055.1;	Mm.275841;Mm.331142;	mmu:381314;	ATP binding; aminoacyl-tRNA editing activity; isoleucine-tRNA ligase activity; isoleucyl-tRNA aminoacylation; mitochondrial matrix; mitochondrion; regulation of translational fidelity	GO:0005524; GO:0002161; GO:0004822; GO:0006428; GO:0005759; GO:0005739; GO:0006450		Class-I aminoacyl-tRNA synthetase family	Mitochondrion matrix.	-0.0850247362639537	0.0739956632319029	-1.14905026254695	0.251085720707727	499	-0.00161441167857746	-0.0866391479425313	0.847726819646639	1.72740476436965	1069.99025545439	1.68391504944362	19.4359604108824	2339073.22651555	1.01543056172195	1957787.23912009	0.890934752439606	2303528.48800315	2197452.99390238	0.019028305219815	0.0636669141610468	0.298872742154309	0.765150242033406	549	-0.00161441167857746	0.0174138935412368	0.763339484813983	1.72740476436965	1069.99025545439	1.63225499590639	93.7329145857671	2339073.22651555	1.01543056172195	2200250.21278414
ADLYTVESK	Q9JHW2	Nit2 D16Ertd502e	Nit2	IPI00119945;	AF284573;AK003604;AK004535;BC020153;	ENSMUST00000023432;	Omega-amidase NIT2 (EC 3.5.1.3) (Nitrilase homolog 2)		NP_075664.1;	Mm.383203;	mmu:52633;	centrosome; mitochondrion; nitrogen compound metabolic process; omega-amidase activity	GO:0005813; GO:0005739; GO:0006807; GO:0050152		UPF0012 family	Cytoplasm.	0.0912251499505906	0.125955371613722	0.724265656810246	0.471042154145154	79	-1.66180698850808	-1.57058183855749	0.577200024606171	1.91570925700698	1.1527868580736	1.6637541323616	1.0593234249351	1833808.08841133	1.57563858502089	1585550.11957246	1.48149503719171	1163850.71160657	1070236.53793535	0.139189337910041	0.110437937323355	1.26033989119611	0.210916730269897	87	-1.66180698850808	-1.52261765059804	0.529641741184982	1.91570925700698	1.1527868580736	1.81979530402525	1.19517549485289	1833808.08841133	1.57563858502089	1535908.20009634
ADMGGAATICSAIVSAAK	Q9CPY7	Lap3 Lapep	Lap3	IPI00331436;IPI00828469;	AF334160;CT010237;CT010301;AK005334;AK008600;AK010502;AK011604;AK166958;AK169032;BC016536;	ENSMUST00000046122;	Cytosol aminopeptidase (EC 3.4.11.1) (Leucine aminopeptidase 3) (LAP-3) (Leucyl aminopeptidase) (Proline aminopeptidase) (EC 3.4.11.5) (Prolyl aminopeptidase)		NP_077754.3;	Mm.286830;	mmu:66988;	aminopeptidase activity; manganese ion binding; metalloexopeptidase activity; mitochondrion; nucleus; peptidase activity; proteolysis; trans-Golgi network	GO:0004177; GO:0030145; GO:0008235; GO:0005739; GO:0005634; GO:0008233; GO:0006508; GO:0005802		Peptidase M17 family	Cytoplasm.	-0.0366552332565747	0.077570807681948	-0.472539017601399	0.636788129730935	419	-0.197715995852873	-0.234371229109447	0.814493480660454	1.6776582176017	8.48519215840328	1.81664743213789	7.75115375313217	1797886.75881879	0.954136000137383	2018391.09354038	1.01037473253132	1884308.69242951	1997665.84471451	-0.0850884577786529	0.0741719243853725	-1.14717878070093	0.251902757884026	461	-0.197715995852873	-0.282804453631526	0.81504786964865	1.6776582176017	8.48519215840328	1.83132735424203	6.47559587809079	1797886.75881879	0.954136000137383	1764953.60375199
ADMVIEAVFEDL	Q8BMS1	Hadha	Hadha	IPI00223092;	AK029017;AK170478;AK170683;BC027156;BC037009;BC046978;BC058569;	ENSMUST00000156859;	Trifunctional enzyme subunit alpha, mitochondrial (TP-alpha) [Includes: Long-chain enoyl-CoA hydratase (EC 4.2.1.17); Long chain 3-hydroxyacyl-CoA dehydrogenase (EC 1.1.1.211)]		NP_849209.1;	Mm.200497;	mmu:97212;	3-hydroxyacyl-CoA dehydrogenase activity; NAD binding; acetyl-CoA C-acyltransferase activity; enoyl-CoA hydratase activity; fatty acid beta-oxidation; fatty-acyl-CoA binding; long-chain-3-hydroxyacyl-CoA dehydrogenase activity; long-chain-enoyl-CoA hydratase activity; mitochondrial fatty acid beta-oxidation multienzyme complex; mitochondrial inner membrane; mitochondrial nucleoid; nucleolus; resp…	GO:0003857; GO:0051287; GO:0003988; GO:0004300; GO:0006635; GO:0000062; GO:0016509; GO:0016508; GO:0016507; GO:0005743; GO:0042645; GO:0005730; GO:0042493; GO:0032868	Lipid metabolism; fatty acid beta-oxidation.	Enoyl-CoA hydratase/isomerase family; 3-hydroxyacyl-CoA dehydrogenase family	Mitochondrion matrix.	-0.0305806746990914	0.0469561947600324	-0.651259644342406	0.514969091308858	1659	1.64653079530313	1.61595012060405	0.980192992031961	2.41540800658322	1.46696801145376	2.32925497466613	1.44141514330618	22940098.9229718	1.79765809397163	23829214.196739	1.83436487204769	12761102.3474933	12990444.0277133	0.101263753945978	0.0451645602031551	2.24210649877875	0.0250741802853801	1825	1.64653079530313	1.74779454924912	0.986667343173409	2.41540800658322	1.46696801145376	2.44276768031248	1.39762861794135	22940098.9229718	1.79765809397163	20505944.347647
ADNCHSHPAVFSEILR	Q08481	Pecam1 Pecam Pecam-1	Pecam1	IPI00554934;IPI00648680;IPI00649034;IPI00955102;	L06039;AK169431;AL603664;AL603664;AL603664;CH466558;CH466558;CH466558;BC008519;BC085502;	ENSMUST00000080853;ENSMUST00000103069;ENSMUST00000106796;	Platelet endothelial cell adhesion molecule (PECAM-1) (CD antigen CD31)		NP_001027550.1;NP_032842.2;	Mm.343951;	mmu:18613;	Rho protein signal transduction; cell adhesion; cell junction; external side of plasma membrane; integral to membrane; membrane raft; positive regulation of tyrosine phosphorylation of Stat5 protein; regulation of cell migration; smooth muscle contractile fiber; wound healing	GO:0007266; GO:0007155; GO:0030054; GO:0009897; GO:0016021; GO:0045121; GO:0042523; GO:0030334; GO:0030485; GO:0042060			Membrane; Single-pass type I membrane protein. Cell junction.	0.215441693615252	0.214127162146617	1.006139022511	0.316390190132265	119	-2.01540576068222	-1.79996406706697	1.20178571693225	1.59409672545872	0.790955725421325	1.19368996128629	0.663174328380565	2788361.53244997	3.27233208961173	941975.310741977	1.46729740210067	852102.248821823	641979.812268046	-0.0808388306471789	0.199614732628271	-0.404974270099189	0.686156965190882	131	-2.01540576068222	-2.0962445913294	1.17247107901979	1.59409672545872	0.790955725421325	1.22789442676316	0.585759138910623	2788361.53244997	3.27233208961173	555025.011995971
ADNFEYSDPVDGSISK	Q9D0F9	Pgm1 Pgm2	Pgm1	IPI00555140;	AK011485;AK147982;CR536609;BC008527;	ENSMUST00000058351;	Phosphoglucomutase-1 (PGM 1) (EC 5.4.2.2) (Glucose phosphomutase 1) (Phosphoglucomutase-2)		NP_082408.3;	Mm.217764;	mmu:72157;	cytosol; galactose catabolic process; glucose metabolic process; glycogen biosynthetic process; magnesium ion binding; phosphoglucomutase activity	GO:0005829; GO:0019388; GO:0006006; GO:0005978; GO:0000287; GO:0004614		Phosphohexose mutase family	Cytoplasm.	0.0807671629386609	0.0448602999704588	1.80041513302067	0.0722027742042258	739	1.29175200443229	1.37251916737095	0.625234144329652	1.68516014478629	1.30455392289241	1.7743453039187	1.29276540983937	9412781.05216142	1.45700670681199	8345752.63728247	1.18776818738368	6460355.3354652	7026415.3611201	0.205017653185398	0.0428401813652609	4.78563924455386	2.02430029508235e-06	813	1.29175200443229	1.49676965761769	0.624864835311723	1.68516014478629	1.30455392289241	1.73511515745226	1.1592399328925	9412781.05216142	1.45700670681199	9544025.33444208
ADPFQDLR	P82348	Sgcg	Sgcg	IPI00110503;	AB024922;	ENSMUST00000077954;ENSMUST00000121148;	Gamma-sarcoglycan (Gamma-SG) (35 kDa dystrophin-associated glycoprotein) (35DAG)		NP_036022.1;	Mm.72173;	mmu:24053;	cellular membrane organization; cytoplasm; cytoskeleton; cytoskeleton organization; integral to plasma membrane; sarcoglycan complex; sarcolemma	GO:0016044; GO:0005737; GO:0005856; GO:0007010; GO:0005887; GO:0016012; GO:0042383		Sarcoglycan beta/delta/gamma/zeta family	Cell membrane › sarcolemma; Single-pass type II membrane protein. Cytoplasm › cytoskeleton.	0.332878711004017	0.121152122736247	2.74760939788655	0.0074341672855192	79	0.661528320954616	0.994407031958634	0.555188773043433	0.878830627267776	1.32848526575489	0.821821685545872	0.826443960203269	2091643.43697534	0.792746852316959	2199265.21523122	0.647975994082748	2638475.86510385	3394053.53796235	0.25833640565856	0.121934645222389	2.11864646989701	0.0369714005123364	87	0.661528320954616	0.919864726613176	0.584778015341488	0.878830627267776	1.32848526575489	0.87592406206398	0.952231384378679	2091643.43697534	0.792746852316959	2485735.29950817
ADPIKVLMPSLSPTMEQGNIVK	Q8BKZ9	Pdhx	Pdhx	IPI00222767;	AK047670;BC061231;	ENSMUST00000011058;	Pyruvate dehydrogenase protein X component, mitochondrial (Dihydrolipoamide dehydrogenase-binding protein of pyruvate dehydrogenase complex) (Lipoyl-containing pyruvate dehydrogenase complex component X)		NP_780303.1;	Mm.315011;	mmu:27402;	mitochondrial matrix; mitochondrion; transferase activity, transferring acyl groups	GO:0005759; GO:0005739; GO:0016746		2-oxoacid dehydrogenase family	Mitochondrion matrix.	-0.144347320767211	0.0956355496419997	-1.50934794966472	0.131963573048174	419	0.726907051469226	0.582559730702014	1.004173271241	2.1670344492783	2.98117131330379	1.97670572325164	3.39313828106452	7487523.19824225	1.39383430153367	6246795.58420039	1.31787767338933	5371889.03301027	4740042.04664521	0.0805599629912383	0.0894719152377429	0.900393858532882	0.368380797356453	461	0.726907051469226	0.807467014460464	0.983173815593872	2.1670344492783	2.98117131330379	2.02753797150546	2.51098550800892	7487523.19824225	1.39383430153367	6302087.90257903
ADPPQEAAQFTSQVIILNHPGQISAGYSPVIDCHTAHIACK	P62631	Eef1a2 Eef1al Stn	Eef1a2	IPI00119667;	L26479;BC018235;	ENSMUST00000055990;	Elongation factor 1-alpha 2 (EF-1-alpha-2) (Eukaryotic elongation factor 1 A-2) (eEF1A-2) (Statin-S1)	JC2445;	NP_031932.1;	Mm.2645;	mmu:13628;	GTP binding; GTP catabolic process; GTPase activity; eukaryotic translation elongation factor 1 complex; negative regulation of apoptotic process; neuronal cell body; nucleus; response to inorganic substance; translation elongation factor activity	GO:0005525; GO:0006184; GO:0003924; GO:0005853; GO:0043066; GO:0043025; GO:0005634; GO:0010035; GO:0003746		GTP-binding elongation factor family, EF-Tu/EF-1A subfamily	Nucleus.	-0.144651634635048	0.108351540964873	-1.33502148051538	0.183394551469879	199	0.0786735070602863	-0.0659781275747566	0.785081500576077	3.03618333242023	38.5921950840916	2.88353151862832	43.7043551343758	10833005.6953297	1.61160121971908	9357699.98441594	1.59927314869441	6721889.73474344	5851220.59484037	0.186934043971246	0.100708339573495	1.85619229512591	0.0647693993961442	219	0.0786735070602863	0.265607551031533	0.763658795163063	3.03618333242023	38.5921950840916	2.95395170135959	11.1214899195727	10833005.6953297	1.61160121971908	13548784.9789653
ADQCYEDVR	O89053	Coro1a Coro1	Coro1a	IPI00323600;	AF143955;AF047388;AF495468;BC002136;BC053398;U89399;	ENSMUST00000032949;ENSMUST00000106364;	Coronin-1A (Coronin-like protein A) (Clipin-A) (Coronin-like protein p57) (Tryptophan aspartate-containing coat protein) (TACO)		NP_034028.1;	Mm.290482;	mmu:12721;	T cell homeostasis; actin filament; actin filament binding; actin filament organization; calcium ion transport; cell-substrate adhesion; cellular response to interleukin-4; cortical actin cytoskeleton; homeostasis of number of cells within a tissue; identical protein binding; immunological synapse; lamellipodium; leukocyte chemotaxis; negative regulation of actin nucleation; phagocytic cup; phago…	GO:0043029; GO:0005884; GO:0051015; GO:0007015; GO:0006816; GO:0031589; GO:0071353; GO:0030864; GO:0048873; GO:0042802; GO:0001772; GO:0030027; GO:0030595; GO:0051126; GO:0001891; GO:0045335; GO:0030670; GO:0001845; GO:0050918; GO:0042102; GO:0030335; GO:0030833; GO:0008360; GO:0032796		WD repeat coronin family	Cytoplasm › cytoskeleton. Cytoplasm › cell cortex. Cytoplasmic vesicle › phagosome membrane.	-0.317681669813443	0.291737387813087	-1.08893026085836	0.278068990598016	139	-2.38020121092792	-2.69788288074137	1.76856392355892	2.4481802212821	1.02856019484491	2.53279963606705	0.93881007739337	1451576.92224462	1.86028155017993	828770.379669325	1.32188266479259	780299.585352671	626962.136461156	-1.31539159324005	0.305233547364813	-4.30945944374819	2.91674969397717e-05	153	-2.38020121092792	-3.69559280416798	1.93648976684245	2.4481802212821	1.02856019484491	3.37889319815238	0.914303435795628	1451576.92224462	1.86028155017993	1010472.3423784
ADQELMTYSHDNIICGITSVSFSK	P62874	Gnb1	Gnb1	IPI00120716;	U29055;AB042854;BC013058;	ENSMUST00000030940;ENSMUST00000105616;ENSMUST00000165335;ENSMUST00000176637;	Guanine nucleotide-binding protein G(I)/G(S)/G(T) subunit beta-1 (Transducin beta chain 1)	JC5057;	NP_001153488.1;NP_001153489.1;NP_032168.1;	Mm.2344;	mmu:14688;	GTPase activity; cardiac muscle cell apoptotic process; cell proliferation; cellular response to hypoxia; elevation of cytosolic calcium ion concentration; heterotrimeric G-protein complex; phospholipase C-activating G-protein coupled receptor signaling pathway; photoreceptor outer segment; phototransduction, visible light; retina development in camera-type eye; sensory perception of taste; signa…	GO:0003924; GO:0010659; GO:0008283; GO:0071456; GO:0007204; GO:0005834; GO:0007200; GO:0001750; GO:0007603; GO:0060041; GO:0050909; GO:0004871		WD repeat G protein beta family		0.0232931156582842	0.0587855994063033	0.396238464752076	0.692997336490954	79	0.38835061813461	0.411643733792895	0.269389459052736	0.648105924234131	1.66886801248629	0.610174124766869	1.48228692598989	1207027.26660641	0.601414687458438	1007808.3369135	0.473667530530563	2006980.02855114	2127670.30027293	-0.0382930958524382	0.0483225011325229	-0.792448547880844	0.430254782832767	87	0.38835061813461	0.350057522282172	0.231746574216668	0.648105924234131	1.66886801248629	0.462076560497439	1.32000180280363	1207027.26660641	0.601414687458438	764008.053402507
ADRDESSPYAAMLAAQDVAQR	P62264	Rps14	Rps14	IPI00322562;	AK003148;AK011213;AK012425;AK012584;AK019233;AK028106;AK146976;AK168237;BC042940;BC081449;BC062874;	ENSMUST00000025511;ENSMUST00000118551;ENSMUST00000122279;	40S ribosomal protein S14		NP_065625.2;	Mm.43778;	mmu:20044;	RNA binding; cytosolic small ribosomal subunit; erythrocyte differentiation; mRNA 5'-UTR binding; maturation of SSU-rRNA; mitochondrion; negative regulation of transcription from RNA polymerase II promoter; nucleolus; ribosomal small subunit assembly; structural constituent of ribosome; translation; translation regulator activity	GO:0003723; GO:0022627; GO:0030218; GO:0048027; GO:0030490; GO:0005739; GO:0000122; GO:0005730; GO:0000028; GO:0003735; GO:0006412; GO:0045182		Ribosomal protein S11P family		0.140056065543106	0.146935665871064	0.953179506914301	0.343406548465827	79	-1.39101255797248	-1.25095649242937	0.673343811142892	0.815985739508685	0.586612777024857	0.547428159982135	0.437607673244513	471190.369956627	0.732903932414399	306199.682350517	0.463087439504151	642908.7757851	661213.533837971	0.18812669366945	0.136714434836267	1.37605581952451	0.172336246705425	87	-1.39101255797248	-1.20288586430303	0.655659396279652	0.815985739508685	0.586612777024857	0.560543075486137	0.465998555740718	471190.369956627	0.732903932414399	345989.854784219
ADRDQYELLCLDNTR	Q921I1	Tf Trf	Tf	IPI00139788;	AF440692;AK085754;AK142599;AK146549;AK149559;AK149595;AK150782;AK168419;AK168938;BC008559;BC012313;BC022986;BC092046;AF027336;M23013;M23014;M23015;M23016;S67217;J03299;	ENSMUST00000035158;ENSMUST00000112645;	Serotransferrin (Transferrin) (Beta-1 metal-binding globulin) (Siderophilin)	A28446;	NP_598738.1;	Mm.37214;	mmu:22041;	ERK1 and ERK2 cascade; SMAD protein signal transduction; actin filament organization; activation of JUN kinase activity; cellular iron ion homeostasis; coated pit; endocytic vesicle; extracellular region; ferric iron binding; iron ion transport; osteoclast differentiation; positive regulation of bone resorption; positive regulation of cell motility; positive regulation of transcription, DNA-depen…	GO:0070371; GO:0060395; GO:0007015; GO:0007257; GO:0006879; GO:0005905; GO:0030139; GO:0005576; GO:0008199; GO:0006826; GO:0030316; GO:0045780; GO:2000147; GO:0045893; GO:0055037		Transferrin family	Secreted.	0.137332711466302	0.0501961837486178	2.73591937096381	0.00630405851161206	1319	1.68328882458616	1.82062153605246	0.934377387891806	2.87155020346483	1.70591651386434	3.047095799627	1.67365690193571	27182846.308046	1.73815995188934	37891233.623561	1.78507199431468	15638863.5456126	21226725.7254843	-0.323884419140228	0.0435933585049125	-7.42967346972657	1.85060200698547e-13	1451	1.68328882458616	1.35940440544593	0.849231743240623	2.87155020346483	1.70591651386434	2.90502737628951	2.13698540673521	27182846.308046	1.73815995188934	29832211.1432218
ADSQAVVCEGTACYTAHWGK	O89103	Cd93 Aa4 C1qr1 C1qrp Ly68	Cd93	IPI00131498;	AF074856;AF081789;AF099939;AF099938;AK079060;AK155060;AL935149;	ENSMUST00000099269;	Complement component C1q receptor (C1q/MBL/SPA receptor) (C1qR(p)) (C1qRp) (Cell surface antigen AA4) (Complement component 1 q subcomponent receptor 1) (Lymphocyte antigen 68) (Ly-68) (CD antigen CD93)		NP_034870.1;	Mm.681;	mmu:17064;	calcium ion binding; carbohydrate binding; cell surface; cell-cell adhesion; cytoplasmic membrane-bounded vesicle; integral to membrane; plasma membrane	GO:0005509; GO:0030246; GO:0009986; GO:0016337; GO:0016023; GO:0016021; GO:0005886			Membrane; Single-pass type I membrane protein.	-0.345214591058549	0.392227262192334	-0.880139205849666	0.384175407637625	39	-0.108012494061379	-0.453227085119928	1.27096159055747	1.20573498100409	11.1629213961019	1.2967371710508	2.86112020579632	1931168.31648195	1.06749031216988	1737870.18663221	1.06387183224318	1809073.38873782	1633533.41442258	-0.0327471553522181	0.356894798478661	-0.091755765261387	0.927318227657541	43	-0.108012494061379	-0.140759649413597	1.21028914627164	1.20573498100409	11.1629213961019	1.23186778382549	8.75156899692091	1931168.31648195	1.06749031216988	1915876.12581883
ADTDDAPVPAPAGDQKDVPASEK	Q02819	Nucb1 Nuc Nucb	Nucb1	IPI00132314;	M96823;AK004886;AK007976;AK140710;AK160981;AK164088;BC072554;	ENSMUST00000033096;	Nucleobindin-1 (CALNUC)	JC1224;	NP_001157134.1;NP_032775.1;	Mm.258923;	mmu:18220;	DNA binding; Golgi apparatus; calcium ion binding; endoplasmic reticulum-Golgi intermediate compartment; membrane; microtubule cytoskeleton	GO:0003677; GO:0005794; GO:0005509; GO:0005793; GO:0016020; GO:0015630		Nucleobindin family	Golgi apparatus › cis-Golgi network membrane; Peripheral membrane protein; Lumenal side. Cytoplasm.	-0.0243028473108811	0.106937185295349	-0.227262829517714	0.820511325215978	159	-1.02862355456351	-1.05292640187439	0.693032168916752	0.875812570273236	0.851441293938564	0.68071277130926	0.646496060975845	1074438.54683815	1.20430342791539	460156.833390124	0.575630917169195	892165.979048958	799395.619076643	-0.219033234311071	0.0999298295483435	-2.19187038846202	0.0297092043665037	175	-1.02862355456351	-1.24765678887458	0.677757079154328	0.875812570273236	0.851441293938564	0.692798548183686	0.55527974869484	1074438.54683815	1.20430342791539	371508.371610624
ADTTTGSIAGAPEDER	Q5DW34	Ehmt1 Euhmtase1 Glp Kmt1d	Ehmt1	IPI00555042;IPI00622226;IPI00869468;	AB205007;AL732525;AL732525;AL732525;BC056938;BC089302;	ENSMUST00000046227;ENSMUST00000091348;ENSMUST00000102938;ENSMUST00000114432;ENSMUST00000147147;	Histone-lysine N-methyltransferase EHMT1 (EC 2.1.1.-) (EC 2.1.1.43) (Euchromatic histone-lysine N-methyltransferase 1) (Eu-HMTase1) (G9a-like protein 1) (GLP) (GLP1) (Lysine N-methyltransferase 1D)		NP_001012536.2;NP_001103156.1;NP_001103157.1;NP_766133.2;	Mm.24176;	mmu:77683;	DNA methylation; chromosome; embryo development; histone methyltransferase activity (H3-K27 specific); histone methyltransferase activity (H3-K9 specific); metal ion binding; negative regulation of transcription from RNA polymerase II promoter; nucleus; peptidyl-lysine dimethylation; peptidyl-lysine monomethylation; zinc ion binding	GO:0006306; GO:0005694; GO:0009790; GO:0046976; GO:0046974; GO:0046872; GO:0000122; GO:0005634; GO:0018027; GO:0018026; GO:0008270		Histone-lysine methyltransferase family	Nucleus. Chromosome.	0.417374369202316	0.215549693465637	1.9363255056953	0.0678462086359699	19	1.44296505960282	1.86033942880514	0.493886393165404	0.446237888711526	0.309250654228837	0.532149669376091	0.286049771959024	2286578.71367625	0.568244594355899	2012145.33671675	0.370640163153345	4023933.94743697	5428837.82372031	0.170998450762411	0.241884883189536	0.706941452924201	0.487373989697515	21	1.44296505960282	1.61396351036523	0.580019573906596	0.446237888711526	0.309250654228837	0.711425907470667	0.440794294853466	2286578.71367625	0.568244594355899	4982268.99975325
ADVDAATLAR	P31001	Des	Des	IPI00130102;	BC031760;Z18892;	ENSMUST00000027409;	Desmin	A54104;	NP_034173.1;	Mm.6712;	mmu:13346;	Z disc; cytoskeleton; fascia adherens; muscle organ development; neuromuscular junction; sarcolemma; structural constituent of cytoskeleton; type III intermediate filament	GO:0030018; GO:0005856; GO:0005916; GO:0007517; GO:0031594; GO:0042383; GO:0005200; GO:0045098		Intermediate filament family	Cytoplasm.	0.0500249306877789	0.0467142393358203	1.07087113905802	0.284476065716514	1039	1.64975407031512	1.6997790010029	0.771845906114513	1.92290930804295	1.16557330734493	1.92487756671988	1.13242813658962	14547476.1067237	1.52493038032554	14222498.1702155	1.40092436670576	9539764.1062264	10152224.1373097	0.204692229254268	0.0422545322266695	4.84426683879069	1.44552456400305e-06	1143	1.64975407031512	1.85444629956939	0.730649165204957	1.92290930804295	1.16557330734493	1.9495088165249	1.05126194108591	14547476.1067237	1.52493038032554	14135647.7245223
ADVLLEPFR	O09174	Amacr Macr1	Amacr	IPI00114331;	AK048249;AK002401;U89906;	ENSMUST00000070877;	Alpha-methylacyl-CoA racemase (EC 5.1.99.4) (2-methylacyl-CoA racemase)		NP_032563.2;	Mm.2787;	mmu:17117;	alpha-methylacyl-CoA racemase activity; bile acid biosynthetic process; fatty acid metabolic process; isoprenoid catabolic process; mitochondrion; peroxisome	GO:0008111; GO:0006699; GO:0006631; GO:0008300; GO:0005739; GO:0005777	Lipid metabolism; bile acid biosynthesis. Lipid metabolism; fatty acid metabolism.	CaiB/BaiF CoA-transferase family	Peroxisome. Mitochondrion.	0.0533621076826687	0.107608787647527	0.495889869677339	0.620469394851923	219	0.847715111527449	0.901077219210118	0.817755987801711	2.17767195302938	2.56887239995705	1.96995311886132	2.18622008953703	25891630.7095471	2.38745354544297	20475987.8316818	2.1543436574391	10844873.0903969	9504513.24744627	0.104252672945811	0.102388968464706	1.01820219999333	0.309602933750428	241	0.847715111527449	0.95196778447326	0.814298120838805	2.17767195302938	2.56887239995705	2.13435689787884	2.24204740190848	25891630.7095471	2.38745354544297	23759100.3891353
ADWSSLSR	P19783	Cox4i1 Cox4 Cox4a	Cox4i1	IPI00117978;	X54691;M37831;M58034;M37829;AK012583;AK019276;AK150447;	ENSMUST00000034276;	Cytochrome c oxidase subunit 4 isoform 1, mitochondrial (Cytochrome c oxidase polypeptide IV) (Cytochrome c oxidase subunit IV isoform 1) (COX IV-1)	S12142;	NP_034071.1;	Mm.386758;	mmu:12857;	cytochrome-c oxidase activity; mitochondrial inner membrane; nucleus; response to nutrient	GO:0004129; GO:0005743; GO:0005634; GO:0007584		Cytochrome c oxidase IV family	Mitochondrion inner membrane.	-0.0494052358837965	0.0768102953161047	-0.643211117474219	0.520476089298917	379	1.90749230423711	1.85808706835332	0.767142223637889	2.46840061762606	1.29405534803103	2.35954686141242	1.26987959907795	61209983.6142736	2.35936730932357	48184173.9562808	2.15509663345727	25943388.8790392	22358242.8779457	-0.0493240294716022	0.0867229400342857	-0.568754120329662	0.569829189985159	417	1.90749230423711	1.85816827476551	0.906451799520963	2.46840061762606	1.29405534803103	2.60360702367424	1.40116859115077	61209983.6142736	2.35936730932357	59309517.2364655
ADYVREMLTTQAER	P51667	Myl2 Mylpc	Myl2	IPI00555015;	M91602;AK002367;AK146674;BC061144;	ENSMUST00000014080;ENSMUST00000111751;	Myosin regulatory light chain 2, ventricular/cardiac muscle isoform (MLC-2) (MLC-2v)	A42858;	NP_034991.3;	Mm.1529;	mmu:17906;	calcium ion binding; cardiac muscle contraction; cardiac myofibril assembly; heart morphogenesis; muscle cell fate specification; muscle fiber development; myofibril; myosin complex; negative regulation of cell growth; post-embryonic development; sarcomere; ventricular cardiac muscle tissue morphogenesis	GO:0005509; GO:0060048; GO:0055003; GO:0003007; GO:0042694; GO:0048747; GO:0030016; GO:0016459; GO:0030308; GO:0009791; GO:0030017; GO:0055010			Cytoplasm › myofibril › sarcomere › A band.	0.0538161762859998	0.0827728508723346	0.650167001847063	0.515736888400678	979	0.911404861655444	0.965221037941445	1.32759499113418	2.95260030354052	3.23961438847004	2.78113144606314	2.88134151322949	136721813.567002	5.50912500107643	53085662.7415116	3.26593582135658	24817337.3340208	16254349.6398105	-0.0414277387104973	0.077325237152845	-0.535759607547134	0.592235321089438	1077	0.911404861655444	0.869977122944946	1.29793583459836	2.95260030354052	3.23961438847004	2.97395412861434	3.41842796802203	136721813.567002	5.50912500107643	44703066.1199944
AEAAAAPAPAAGPGQMSFTFASPTQVFFDSANVK	Q9D3D9	Atp5d	Atp5d	IPI00453777;	AK018011;BC008273;	ENSMUST00000003156;ENSMUST00000105367;	ATP synthase subunit delta, mitochondrial (F-ATPase delta subunit)		NP_079589.2;	Mm.278560;Mm.490352;	mmu:66043;	ADP biosynthetic process; ATP synthesis coupled proton transport; hydrogen ion transporting ATP synthase activity, rotational mechanism; mitochondrial proton-transporting ATP synthase complex; mitochondrial proton-transporting ATP synthase complex, catalytic core F(1); proton-transporting ATPase activity, rotational mechanism	GO:0006172; GO:0015986; GO:0046933; GO:0005753; GO:0000275; GO:0046961		ATPase epsilon chain family	Mitochondrion. Mitochondrion inner membrane.	0.165291932989704	0.264292509656841	0.625412854886881	0.532897675318383	119	2.32906332322196	2.49435525621167	1.48333803153982	3.99723295847432	1.71624056702102	3.48405817981771	1.39677705136082	37336760.1828481	1.1557967173459	36422062.1133896	1.16233682735473	32303916.0974482	31335204.4400758	0.488142936760916	0.289573940083859	1.68572813085166	0.094228664107939	131	2.32906332322196	2.81720625998288	1.7008617826741	3.99723295847432	1.71624056702102	3.83598706689096	1.36162805023523	37336760.1828481	1.1557967173459	47177330.0419954
AEACFVNCVER	Q9WVA2	Timm8a1 Ddp1 Tim8a Timm8a	Timm8a1	IPI00125776;	AF150081;AB031055;AK011402;AK088903;AK090079;AK165573;BC004796;BC094631;	ENSMUST00000052902;ENSMUST00000054213;	Mitochondrial import inner membrane translocase subunit Tim8 A (Deafness dystonia protein 1 homolog)	JC7322;	NP_038926.1;	Mm.214504;	mmu:30058;	metal ion binding; mitochondrial inner membrane; mitochondrial intermembrane space protein transporter complex; protein import into mitochondrial inner membrane	GO:0046872; GO:0005743; GO:0042719; GO:0045039		Small Tim family	Mitochondrion inner membrane; Peripheral membrane protein; Intermembrane side.	-0.159037790203176	0.321320591453937	-0.49495050872261	0.622473304467658	59	1.86182060847168	1.70278281826851	1.27520156416695	1.77605526007257	0.953934687365226	1.86063343551361	1.09270155627105	14388428.8265392	1.35184496235368	16254845.3977248	1.46781098339756	10643549.5395032	11074208.8603939	0.0587265323720037	0.250590995473967	0.234352125306532	0.815448242692387	65	1.86182060847168	1.92054714084369	1.04078257141823	1.77605526007257	0.953934687365226	1.70770828358993	0.889178009366509	14388428.8265392	1.35184496235368	12536271.8393299
AEAEKAEEELEEDDDDELDETLSER	Q9CPQ3	Tomm22 Tom22	Tomm22	IPI00315135;	AK008133;AK009868;AK013471;AK049442;AK150360;AK152843;AK167803;BC056920;	ENSMUST00000023062;	Mitochondrial import receptor subunit TOM22 homolog (Translocase of outer membrane 22 kDa subunit homolog)		NP_766197.2;	Mm.246435;Mm.485795;	mmu:223696;	integral to membrane; mitochondrial inner membrane; mitochondrial outer membrane translocase complex; protein import into mitochondrial outer membrane; protein transmembrane transporter activity	GO:0016021; GO:0005743; GO:0005742; GO:0045040; GO:0008320		Tom22 family	Mitochondrion outer membrane; Single-pass membrane protein.	-0.514752988100039	0.325021599809015	-1.58375009046325	0.121327196220749	39	-2.79727372067764	-3.31202670877768	1.05319035487196	0.984476349660803	0.351941371480198	1.31175296769005	0.396057484745999	195682.459135555	0.778036980178295	136948.155711368	0.663729400987728	251507.915588681	206331.308372914	0.249378929956356	0.298495573197558	0.835452691257521	0.408081131441794	43	-2.79727372067764	-2.54789479072128	1.01224773796398	0.984476349660803	0.351941371480198	1.04065318328822	0.408436481395537	195682.459135555	0.778036980178295	209396.995312013
AEAETMYQIKYEELQTLAGK	P11679	Krt8 Krt2-8	Krt8	IPI00322209;	X12789;X15662;M21836;M21836;M22831;D90360;AK077597;AK145546;AK145679;AK145777;AK146948;AK147044;AK166737;AK166768;AK166854;AK166960;AK166993;AK167120;AK167269;AK167471;AK168522;AK168540;AK168561;AK168726;AK168910;AK169136;AK169691;BC094009;BC106154;	ENSMUST00000023952;	Keratin, type II cytoskeletal 8 (Cytokeratin endo A) (Cytokeratin-8) (CK-8) (Keratin-8) (K8) (Type-II keratin Kb8)	JS0658;JT0407;S05474;	NP_112447.2;	Mm.358618;	mmu:16691;	Z disc; apoptotic process; cell differentiation involved in embryonic placenta development; cell morphogenesis involved in differentiation; intermediate filament; keratin filament; nuclear matrix; nucleoplasm; response to other organism; sarcolemma; structural molecule activity; tumor necrosis factor-mediated signaling pathway	GO:0030018; GO:0006915; GO:0060706; GO:0000904; GO:0005882; GO:0045095; GO:0016363; GO:0005654; GO:0051707; GO:0042383; GO:0005198; GO:0033209		Intermediate filament family	Cytoplasm. Nucleus › nucleoplasm. Nucleus matrix.	-1.87163001385628	1.39819562572017	-1.33860382583607	0.196497950365994	19	6.11475200769246	4.24312199383618	3.20366864560941	2.10050386004508	0.34351415354255	4.32610321105821	1.01955664186478	75973653.4466428	0.555232062451845	85829129.1991193	0.794863621125961	136832251.925711	107979692.261596	-0.00666362911628206	0.93843405547932	-0.00710079635044629	0.994401456310053	21	6.11475200769246	6.10808837857618	2.25028581290896	2.10050386004508	0.34351415354255	2.39408842814281	0.391953796303924	75973653.4466428	0.555232062451845	89164762.9398037
AEAPGLLR	Q80TA6	Mtmr12 Kiaa1682	Mtmr12	IPI00336231;IPI00466750;	AK122539;AK030139;AK076161;BC054352;	ENSMUST00000038172;ENSMUST00000071993;	Myotubularin-related protein 12		NP_766546.1;	Mm.54460;	mmu:268783;	cytoplasm; phosphatase activity	GO:0005737; GO:0016791		Protein-tyrosine phosphatase family, Non-receptor class myotubularin subfamily	Cytoplasm.	-0.000886507071975785	0.106728681111332	-0.00830617471091057	0.993459302031787	19	2.26055033963561	2.25966383256363	0.244546130007741	0.239201177723334	0.105815461628646	0.2345918906408	0.103817163978171	2427373.18855985	0.364484053794577	1527696.2973127	0.22014548827837	6659751.40280873	6939484.925446	-0.0683920059862577	0.101301799447935	-0.675131205555818	0.506958577348864	21	2.26055033963561	2.19215833364935	0.242913181580354	0.239201177723334	0.105815461628646	0.243003159308363	0.110851098471445	2427373.18855985	0.364484053794577	1229012.50922892
AECMLQQAER	Q61233	Lcp1 Pls2	Lcp1	IPI00118892;	D37837;AK009211;AK030806;AK030987;AK030996;AK088202;AK149790;AK151155;AK152891;AK153082;AK153206;AK169728;AK169833;BC022943;	ENSMUST00000124499;ENSMUST00000131802;ENSMUST00000145303;	Plastin-2 (65 kDa macrophage protein) (L-plastin) (Lymphocyte cytosolic protein 1) (LCP-1) (pp65)	I49445;	NP_001234913.1;NP_032905.2;	Mm.153911;Mm.484415;	mmu:18826;	T cell activation involved in immune response; actin filament; actin filament binding; actin filament bundle assembly; calcium ion binding; cell junction; cytosol; organ regeneration; phagocytic cup; regulation of intracellular protein transport; ruffle; ruffle membrane	GO:0002286; GO:0005884; GO:0051015; GO:0051017; GO:0005509; GO:0030054; GO:0005829; GO:0031100; GO:0001891; GO:0033157; GO:0001726; GO:0032587			Cytoplasm › cytoskeleton. Cell projection. Cell junction. Cell projection › ruffle membrane; Peripheral membrane protein; Cytoplasmic side.	-0.0481278213474602	0.192002312563492	-0.250662717052146	0.80244502546899	139	-0.489909284335678	-0.538037105683134	1.16395216185741	2.40172213874993	4.90238135006298	2.31751818183072	4.30735753603502	15709820.1160384	2.76244202220599	15560798.2822316	2.75487570083527	5686932.06581512	5648457.48848617	-0.629013390894466	0.16420442196035	-3.83067266633264	0.000186048971443995	153	-0.489909284335678	-1.11892267523014	1.0417602702643	2.40172213874993	4.90238135006298	2.90323638685328	2.59467115210275	15709820.1160384	2.76244202220599	30997522.3366203
AEDGAAPSPSSETPK	P26645	Marcks Macs	Marcks	IPI00229534;	M60474;BC046601;	ENSMUST00000092584;	Myristoylated alanine-rich C-kinase substrate (MARCKS)	A39169;	NP_032564.1;	Mm.30059;	mmu:17118;	cell cortex; centrosome; germinal vesicle; membrane	GO:0005938; GO:0005813; GO:0042585; GO:0016020		MARCKS family	Cytoplasm › cytoskeleton. Membrane; Lipid-anchor.	-0.068812861419231	0.216474635550446	-0.317879557779393	0.751698679664097	59	-2.67879519898595	-2.74760806040518	0.859107076229731	1.00350598752892	0.374610939988543	0.826925241622665	0.300961863352782	214797.472696195	0.769823924181075	165776.147669477	0.643068396495432	279021.560579184	257789.293600675	0.289497972429254	0.195263107011532	1.48260455781929	0.143011923317988	65	-2.67879519898595	-2.38929722655669	0.81098859212476	1.00350598752892	0.374610939988543	0.770506325958611	0.322482409218303	214797.472696195	0.769823924181075	199752.149196043
AEDGSVIDYELIDQDAR	P07356	Anxa2 Anx2 Cal1h	Anxa2	IPI00468203;	M14044;BC003327;BC005763;M33321;M33322;D10024;	ENSMUST00000034756;	Annexin A2 (Annexin II) (Annexin-2) (Calpactin I heavy chain) (Calpactin-1 heavy chain) (Chromobindin-8) (Lipocortin II) (Placental anticoagulant protein IV) (PAP-IV) (Protein I) (p36)	LUMS36;	NP_031611.1;	Mm.238343;	mmu:12306;	Schmidt-Lanterman incisure; angiogenesis; basement membrane; body fluid secretion; calcium ion binding; calcium-dependent phospholipid binding; cellular response to acid; collagen fibril organization; early endosome; extrinsic to plasma membrane; fibrinolysis; lipid particle; melanosome; midbody; myelin sheath adaxonal region; perinuclear region of cytoplasm; phosphatidylinositol-4,5-bisphosphate…	GO:0043220; GO:0001525; GO:0005604; GO:0007589; GO:0005509; GO:0005544; GO:0071229; GO:0030199; GO:0005769; GO:0019897; GO:0042730; GO:0005811; GO:0042470; GO:0030496; GO:0035749; GO:0048471; GO:0005546; GO:0004859; GO:0051099; GO:0031340; GO:0043234; GO:0042383		Annexin family	Secreted › extracellular space › extracellular matrix › basement membrane. Melanosome.	0.21728440253795	0.0678372502427127	3.20302491272177	0.0014504904605348	479	0.893880213632138	1.11116461617009	0.761471245407235	2.04192564891199	2.28433924117746	2.11891847480692	1.90693479973319	6032671.10843368	1.17521121390614	9110431.49795093	1.3333253027137	5133265.43947996	6832864.77756673	0.0830694080502157	0.061430441759649	1.35225151684943	0.176874851105282	527	0.893880213632138	0.976949621682355	0.721644293347087	2.04192564891199	2.28433924117746	2.10708019358845	2.15679513746057	6032671.10843368	1.17521121390614	5416620.11149031
AEDSATYYCAR	P84751		NA	IPI00720211;	DQ220746;		Ig heavy chain Mem5 (Fragment)					antigen binding; extracellular region	GO:0003823; GO:0005576			Secreted.	-1.49447661675002	0.771639392534816	-1.93675521390984	0.0677903503047985	19	-4.71397252490609	-6.20844914165612	1.76804796275027	1.72780978719266	0.366529456432731	1.69886342412145	0.27363732638523	138142.358209842	1.48947518764424	17758.530877924	0.657793829221403	92745.6592468175	26997.1077395844	-0.119649405189079	0.658247259181126	-0.181769697511426	0.857506564396092	21	-4.71397252490609	-4.83362193009517	1.57842147785752	1.72780978719266	0.366529456432731	1.31679975783181	0.272425062794656	138142.358209842	1.48947518764424	40966.7243048001
AEDSGEYHCVYHFVSAPK	P97300	Nptn Sdfr1 Sdr1	Nptn	IPI00123831;IPI00459329;IPI00662285;IPI00757771;	D50463;AK075610;AK076624;AK153930;	ENSMUST00000085651;ENSMUST00000176250;ENSMUST00000176557;ENSMUST00000176916;ENSMUST00000177292;	Neuroplastin (Stromal cell-derived receptor 1) (SDR-1)		NP_033171.2;	Mm.15125;	mmu:20320;	cell adhesion molecule binding; elevation of cytosolic calcium ion concentration; homophilic cell adhesion; integral to membrane; long-term synaptic potentiation; plasma membrane; positive regulation of fibroblast growth factor receptor signaling pathway; positive regulation of long-term neuronal synaptic plasticity; positive regulation of neuron projection development; positive regulation of pro…	GO:0050839; GO:0007204; GO:0007156; GO:0016021; GO:0060291; GO:0005886; GO:0045743; GO:0048170; GO:0010976; GO:0001934; GO:0042734; GO:0005105			Cell membrane; Single-pass type I membrane protein.	0.129415257412967	0.243396431847306	0.531705647575618	0.597945750744882	39	-2.69714969241538	-2.56773443500241	0.788694580860046	2.00406163453521	0.743029443330791	1.84862371015384	0.719943497642936	403579.833492585	0.960369625993102	411904.183707871	0.913264733057548	420233.858474282	451023.858469651	-0.154469889643621	0.218484420918862	-0.707006426334564	0.483376538512815	43	-2.69714969241538	-2.851619582059	0.740916719421879	2.00406163453521	0.743029443330791	1.95551519290129	0.685755984144744	403579.833492585	0.960369625993102	343165.553865394
AEDTGIYYCTR	P01804		NA	IPI00457470;			Ig heavy chain V-III region HPC76 (Fragment)	MHMS76;				antigen binding	GO:0003823				-0.404630109592719	1.28872894288385	-0.313976117186643	0.756960399543396	19	-7.42664700679415	-7.83127711638687	2.95284896552284	2.29397385981931	0.308884191980676	3.64745852439244	0.465755261904877	19525.4541506579	1.18975883406314	404201.71417961	2.71614478004442	16411.270579918	148814.495143738	-1.42439193189939	0.932067413580093	-1.52820698497362	0.141384493399938	21	-7.42664700679415	-8.85103893869354	2.23501914194998	2.29397385981931	0.308884191980676	2.10736842334987	0.238092775090754	19525.4541506579	1.18975883406314	10760.0674232426
AEEQEPELTSTPNFVVEVTK	Q8R5L1	C1qbp DN-393H17.2-001 mCG_21176 RP23-83I13.1-001	C1qbp	IPI00132799;	BC038075;AF300619;AL596136;CR936847;CH466596;	ENSMUST00000078528;	0		NP_031599.2;	Mm.30049;	mmu:12261;	extracellular space; membrane; mitochondrial matrix; mitochondrion; nucleus	GO:0005615; GO:0016020; GO:0005759; GO:0005739; GO:0005634				-0.428765190848044	0.229067985273066	-1.8717813854997	0.0767141498443873	19	1.71859422534283	1.28982903449479	0.524860690902427	0.554243396746782	0.322498114199248	0.422771429167158	0.327773230296954	2617840.37267744	0.52560335309554	1386853.56935434	0.374516623063737	4980638.6455864	3703049.43478655	0.372257235004875	0.226767264549227	1.64158277317873	0.115568956283059	21	1.71859422534283	2.09085146034771	0.543768797890289	0.554243396746782	0.322498114199248	0.518277507022474	0.247878683326593	2617840.37267744	0.52560335309554	3407400.69006107
AEERAELSEGK	P58771	Tpm1 Tpm-1 Tpma	Tpm1	IPI00123316;IPI00227835;	X64831;M22479;	ENSMUST00000113685;ENSMUST00000113707;	Tropomyosin alpha-1 chain (Alpha-tropomyosin) (Tropomyosin-1)	A60597;	NP_001157720.1;NP_077745.2;	Mm.121878;	mmu:22003;	cardiac muscle contraction; in utero embryonic development; muscle thin filament tropomyosin; positive regulation of heart rate by epinephrine; structural constituent of cytoskeleton; ventricular cardiac muscle tissue morphogenesis	GO:0060048; GO:0001701; GO:0005862; GO:0003065; GO:0005200; GO:0055010		Tropomyosin family	Cytoplasm › cytoskeleton.	0.0807536683342862	0.0539239461317546	1.49754745576255	0.134744652822102	639	3.27251206116065	3.35326572949493	0.698934224629631	2.53055508782695	0.773276015651856	2.584965011538	0.770879858640771	70074905.0805572	1.62903674930223	82590583.1255136	1.68714895416724	43016159.7708416	48952751.2799126	0.501848626190422	0.053443566446922	9.39025329997087	8.15872900287657e-20	703	3.27251206116065	3.77436068735107	0.724943806236213	2.53055508782695	0.773276015651856	2.57852420326912	0.683168466625479	70074905.0805572	1.62903674930223	113389594.968663
AEEYEFLTPMEEAPK	Q99PT1	Arhgdia C87222 Gdi1	Arhgdia	IPI00322312;	AB055070;AK075656;AK077343;AK143516;AK156819;AK165241;AK170553;AK170718;AK172140;AL663030;BC004732;BC086755;	ENSMUST00000067936;ENSMUST00000106197;	Rho GDP-dissociation inhibitor 1 (Rho GDI 1) (GDI-1) (Rho-GDI alpha)		NP_598557.3;	Mm.30016;Mm.474783;	mmu:192662;	GTPase activator activity; Rho GDP-dissociation inhibitor activity; Rho protein signal transduction; cytoplasm; immunological synapse; positive regulation of GTPase activity; regulation of protein localization	GO:0005096; GO:0005094; GO:0007266; GO:0005737; GO:0001772; GO:0043547; GO:0032880		Rho GDI family	Cytoplasm.	0.194099133242913	0.0622198610596188	3.11956873476346	0.00200085369840928	279	0.896818898168619	1.09091803141153	0.533424190120257	2.27175002209604	2.53312015027242	2.13179687194256	1.95413111760948	9804691.29779853	1.38827703728777	10006043.3247308	1.30277178808685	7062488.99495853	7680580.29520647	-0.0738421148539577	0.0636875283724052	-1.15944387764862	0.247176277379884	307	0.896818898168619	0.822976783314663	0.571415918792928	2.27175002209604	2.53312015027242	2.37431913766356	2.88503781127414	9804691.29779853	1.38827703728777	8561996.56856374
AEEYVKLTSLYLFAK	Q8BJ34	Marf1 Kiaa0430 Lkap	Marf1	IPI00461878;IPI00469394;IPI00659945;IPI00828522;IPI01007709;	AK035704;AK053159;BC031575;AK220341;	ENSMUST00000090300;	Meiosis arrest female protein 1 (Limkain-b1)		NP_001074623.1;	Mm.394072;Mm.85442;	mmu:223989;	RNA binding; cell differentiation; female meiosis; negative regulation of phosphatase activity; nucleotide binding; oogenesis; peroxisome; regulation of gene expression	GO:0003723; GO:0030154; GO:0007143; GO:0010923; GO:0000166; GO:0048477; GO:0005777; GO:0010468			Peroxisome.	0.0599582618537703	0.289764327056929	0.206920784427651	0.838273151103142	19	1.25980485891836	1.31976312077213	0.66393348121816	0.740839571373013	0.588058988762023	0.433331545272195	0.328340395675456	2021486.79824763	0.556039631452402	1347694.97890852	0.358201637308911	3635508.4851909	3762392.01203394	0.245419444881685	0.327968492756456	0.748301895767557	0.462577071286424	21	1.25980485891836	1.50522430380004	0.786440818107386	0.740839571373013	0.588058988762023	0.828732675313609	0.55057088383533	2021486.79824763	0.556039631452402	3111285.26276946
AEFASACTPGLHVDLSAAGSEIKPEVSSSMPAAVDVLR	Q149B8		NA	IPI00228238;IPI00775917;	AK036660;AK040833;BC117871;BC117872;		Uncharacterized protein C1orf170 homolog		NP_766005.2;	Mm.431343;	mmu:74183;						-0.284813779302655	0.113182106070965	-2.51642056496171	0.0131867541773743	119	-0.883175915411703	-1.16798969471436	0.63523299484659	0.775615134084322	0.878211373917234	0.892320383148601	0.763979671384708	577654.127498523	0.679190009538445	386093.382129117	0.513104485052196	850504.452930745	752465.42054654	-0.0655427934761722	0.106449963290803	-0.615714570958754	0.539151200864538	131	-0.883175915411703	-0.948718708887874	0.625251962507246	0.775615134084322	0.878211373917234	0.730149139827035	0.769616044236067	577654.127498523	0.679190009538445	479876.692833325
AEFGFDLSHIPR	Q9DBB8	Dhdh	Dhdh	IPI00172146;	AK005050;AK154452;BC116414;	ENSMUST00000011526;	Trans-1,2-dihydrobenzene-1,2-diol dehydrogenase (EC 1.3.1.20) (D-xylose 1-dehydrogenase) (D-xylose-NADP dehydrogenase) (EC 1.1.1.179) (Dimeric dihydrodiol dehydrogenase)		NP_082179.1;	Mm.34208;	mmu:71755;	D-xylose 1-dehydrogenase (NADP+) activity; D-xylose catabolic process; nucleotide binding; trans-1,2-dihydrobenzene-1,2-diol dehydrogenase activity	GO:0047837; GO:0042843; GO:0000166; GO:0047115		Gfo/Idh/MocA family		0.57055796348581	0.137066700421942	4.16263003143302	6.71925300283403e-05	99	-1.62114039891315	-1.05058243542734	0.702257865438087	1.34520414665887	0.829788800254886	0.96538677111633	0.918906254818208	552359.922611202	0.849186296557261	511155.336330576	0.601186191362112	650457.885213832	850244.639139909	0.367017186001358	0.126968896861517	2.89060703111927	0.00464116362535083	109	-1.62114039891315	-1.25412321291179	0.680794864216916	1.34520414665887	0.829788800254886	1.25247487493374	0.998685665043851	552359.922611202	0.849186296557261	537641.809854448
AEFTMMVK	Q8BZ52	Fsd2 Spryd1	Fsd2	IPI00623772;	AK036674;	ENSMUST00000042318;	Fibronectin type III and SPRY domain-containing protein 2 (SPRY domain-containing protein 1)		NP_766492.2;	Mm.38773;	mmu:244091;						-0.181060696344532	0.241732537281089	-0.749012517640488	0.463022573274497	19	-1.50959421981979	-1.69065491616432	0.553878825012163	0.6527048195014	0.432371037813936	0.234866669049763	0.138920525297154	237416.245894905	0.463785713824451	95579.0425861058	0.212961968869569	511909.355588236	448808.034098539	-0.422851112347814	0.230435321106381	-1.83500997293989	0.0807100154536685	21	-1.50959421981979	-1.9324453321676	0.552564488523335	0.6527048195014	0.432371037813936	0.363701350157922	0.188207833931303	237416.245894905	0.463785713824451	142085.214484624
AEGAAQLSEER	P59017	Bcl2l13 Mil1	Bcl2l13	IPI00321499;	AK047223;AK132774;AK168833;CH466523;BC027307;BC029016;	ENSMUST00000009256;	Bcl-2-like protein 13 (Bcl2-L-13) (Bcl-rambo) (Protein Mil1)		NP_705736.1;	Mm.27990;	mmu:94044;	apoptotic process; integral to membrane; mitochondrial membrane; mitochondrion; regulation of apoptotic process	GO:0006915; GO:0016021; GO:0031966; GO:0005739; GO:0042981		Bcl-2 family	Mitochondrion membrane; Single-pass membrane protein.	-0.132088756120411	0.136453903070392	-0.968010098269382	0.334720616655677	139	-0.847163145295241	-0.979251901415652	0.827207825531491	1.25058237325584	1.47620016309847	1.42444097151027	1.45462160395199	894915.613038387	0.835650044535397	1016223.10164665	0.908223457935021	1070921.51659723	1118913.07449511	0.323606822653207	0.124181091190121	2.60592671196427	0.0100677733771667	153	-0.847163145295241	-0.523556322642034	0.787840702311742	1.25058237325584	1.47620016309847	1.33621131535214	2.55218255909734	894915.613038387	0.835650044535397	1396780.24117171
AEGLEKSLNSLETK	Q8K2I2	Cchcr1 Hcr	Cchcr1	IPI00400252;	CH466559;BC031416;	ENSMUST00000045956;ENSMUST00000164242;	Coiled-coil alpha-helical rod protein 1 (Alpha-helical coiled-coil rod protein)		NP_666360.2;	Mm.49544;	mmu:240084;	cell differentiation; cytoplasm; multicellular organismal development; nucleus; protein export from nucleus	GO:0030154; GO:0005737; GO:0007275; GO:0005634; GO:0006611			Cytoplasm. Nucleus.	0.331757547111384	0.218285131278015	1.51983575413044	0.145018900418553	19	3.93664082364422	4.26839837075561	0.500154068582438	0.485257577583299	0.123266916978747	0.486648656773672	0.114012005090219	13314925.5111794	0.578801015273062	10152950.1752404	0.351278995719961	23004323.0053731	28902810.2987813	-0.0375515954823864	0.23220842499147	-0.161715043215016	0.873076059213178	21	3.93664082364422	3.89908922816184	0.556816242276445	0.485257577583299	0.123266916978747	0.630208069761718	0.161629558310677	13314925.5111794	0.578801015273062	4420241.25878361
AEGTTIAEPDTK	Q3UZA1	Rcsd1 Capzip	Rcsd1	IPI00153710;IPI00652534;	AK133961;AK158429;AK168816;AK171323;AK171914;BC025872;	ENSMUST00000040357;ENSMUST00000097474;	CapZ-interacting protein (Protein kinase substrate CapZIP)		NP_001033935.1;NP_848708.2;	Mm.265552;Mm.482459;	mmu:226594;	cellular hyperosmotic response; skeletal muscle contraction	GO:0071474; GO:0003009				0.13868783326529	0.315609452427156	0.439428642579391	0.661956300982147	59	-3.55491315867298	-3.41622532540769	1.25253618381529	1.6290636591895	0.458256949319577	1.73632440427674	0.508258161826469	163413.746706394	0.872763542236863	152081.588023756	0.731924858578057	187237.13674791	207783.06166457	0.816601203174223	0.273890150159525	2.98149167722388	0.00403369285969426	65	-3.55491315867298	-2.73831195549876	1.13755122856666	1.6290636591895	0.458256949319577	1.36076311134168	0.496935021814865	163413.746706394	0.872763542236863	285898.02172888
AEHFLQR	Q9ES89	Extl2 Extr2	Extl2	IPI00112900;	AF200973;AK019370;BC031438;BC094444;	ENSMUST00000029575;ENSMUST00000106502;	Exostosin-like 2 (EC 2.4.1.223) (Alpha-1,4-N-acetylhexosaminyltransferase EXTL2) (Alpha-GalNAcT EXTL2) (EXT-related protein 2) (Glucuronyl-galactosyl-proteoglycan 4-alpha-N-acetylglucosaminyltransferase)		NP_001156986.1;NP_067363.3;	Mm.41739;	mmu:58193;	N-acetylglucosamine metabolic process; UDP-N-acetylgalactosamine metabolic process; alpha-1,4-N-acetylgalactosaminyltransferase activity; glucuronyl-galactosyl-proteoglycan 4-alpha-N-acetylglucosaminyltransferase activity; heparan sulfate proteoglycan biosynthetic process; integral to membrane; intrinsic to endoplasmic reticulum membrane; metal ion binding	GO:0006044; GO:0019276; GO:0035248; GO:0001888; GO:0015012; GO:0016021; GO:0031227; GO:0046872	Glycan metabolism; heparan sulfate biosynthesis.	Glycosyltransferase 47 family	Endoplasmic reticulum membrane; Single-pass type II membrane protein.	0.719681452328444	0.437599466943596	1.64461226919457	0.116493758166654	19	-2.30184365052237	-1.58216219819393	1.00266634067068	0.837155884332329	0.363689290600753	1.17160740295239	0.740510299316853	165218.01557915	0.528059611363981	514146.20103417	0.862971706858911	312877.584317405	595785.698358045	0.0317858158834112	0.339950412392593	0.0935013305608325	0.926391633596569	21	-2.30184365052237	-2.27005783463896	0.815172452057778	0.837155884332329	0.363689290600753	0.767916055915054	0.338280392771221	165218.01557915	0.528059611363981	157924.05505983
AEIAAEYGIK	Q8BUZ3	Tigd4	Tigd4	IPI00225767;	AK081667;	ENSMUST00000062623;	Tigger transposable element-derived protein 4		NP_997161.1;	Mm.83086;	mmu:403175;	DNA binding; nucleus	GO:0003677; GO:0005634		Tigger transposable element derived protein family	Nucleus.	0.0313800351994972	0.255249439953151	0.122938703431658	0.903446759795526	19	1.21888696478561	1.25026699998511	0.5848499398402	0.540895991247891	0.443762224779414	0.611753603364756	0.489298368566107	2552453.31645383	0.720231320056029	1417782.87690902	0.385986290974223	3543935.46264452	3673143.08839974	-0.449250715312526	0.288005739473047	-1.55986723089096	0.133735471736471	21	1.21888696478561	0.769636249473088	0.690613502129915	0.540895991247891	0.443762224779414	0.838958540753724	1.0900714997872	2552453.31645383	0.720231320056029	1386491.84660936
AEIARLQMELMEYKAGK	Q9QXL1	Kif21b Kif6	Kif21b	IPI00135132;	AF202893;U71298;		Kinesin-like protein KIF21B (Kinesin-like protein KIF6)		NP_001034561.1;	Mm.276135;	mmu:16565;	ATP binding; cytoplasm; dendrite; microtubule; microtubule associated complex; microtubule motor activity; microtubule-based movement	GO:0005524; GO:0005737; GO:0030425; GO:0005874; GO:0005875; GO:0003777; GO:0007018		Kinesin-like protein family	Cytoplasm › cytoskeleton. Cell projection › dendrite.	-0.119843792001102	0.532666539547468	-0.224988399126622	0.824390374264373	19	0.505114539147763	0.385270747146661	1.22049236882323	0.60115000172379	1.19012611028393	1.78731277692874	4.63910844559492	1642569.04184792	0.730814326692852	2110410.09918623	0.724630105306741	2247587.35817486	2912396.38503962	0.329679097792166	0.302277894552448	1.09064904756032	0.287783928019962	21	0.505114539147763	0.83479363693993	0.724836927747614	0.60115000172379	1.19012611028393	0.850416525193527	1.01871467098248	1642569.04184792	0.730814326692852	3343093.49590481
AEIERVKNMLLK	Q5SYD0	Myo1d	Myo1d	IPI00226551;IPI00408207;	AK049374;AL591146;AL591410;AL663054;AL591410;AL591146;AL663054;AL591410;AL663054;AL663054;AL591146;AL591410;AL663054;AL591410;	ENSMUST00000041065;ENSMUST00000070997;	Unconventional myosin-Id		NP_796364.2;	Mm.151948;	mmu:338367;	ATP binding; actin-dependent ATPase activity; axolemma; microfilament motor activity; myosin complex; negative regulation of phosphatase activity; smooth endoplasmic reticulum	GO:0005524; GO:0030898; GO:0030673; GO:0000146; GO:0016459; GO:0010923; GO:0005790				0.572921279413362	0.265469761829407	2.15814138478614	0.0439235673837749	19	-1.68073780879959	-1.10781652938623	0.608267639152578	0.533303692282307	0.317303323272772	0.678057326645215	0.612066446617187	267964.653761193	0.563806899419097	464629.074991492	0.609464936008676	475277.358324779	762355.711608777	0.00487152479503615	0.217655014839729	0.0223818633291004	0.982354657506913	21	-1.68073780879959	-1.67586628400456	0.521918390687736	0.533303692282307	0.317303323272772	0.495546716039718	0.295695856387532	267964.653761193	0.563806899419097	175219.210188945
AEIKALKEK	Q8BR07	Bicd1	Bicd1	IPI00262094;IPI00338821;IPI00338822;IPI00338823;	AK038585;AK043650;AK045975;AK051718;AK082523;BC016192;U90029;AJ288054;AJ288055;AJ288056;	ENSMUST00000086829;ENSMUST00000111513;	Protein bicaudal D homolog 1 (Bic-D 1)		NP_033883.2;	Mm.177181;Mm.260763;	mmu:12121;	Golgi apparatus; cytoplasmic microtubule; cytoplasmic vesicle; cytosol; host cell viral assembly compartment; membrane; microtubule anchoring at microtubule organizing center; minus-end-directed organelle transport along microtubule; negative regulation of phospholipase C activity; negative regulation of phospholipase C-activating G-protein coupled receptor signaling pathway; perinuclear region o…	GO:0005794; GO:0005881; GO:0031410; GO:0005829; GO:0072517; GO:0016020; GO:0072393; GO:0072385; GO:1900275; GO:1900737; GO:0048471; GO:0048260; GO:0033365; GO:1900276; GO:0034063; GO:0005802; GO:0016032		BicD family	Golgi apparatus.	-0.964859686928531	0.436473879984389	-2.21057829843802	0.0395282353073127	19	2.47644338801301	1.51158370108448	1.00008729694977	1.01896921051446	0.411464770584576	0.883697818151248	0.584617191570168	4668226.563237	0.523641998449779	2916359.77963676	0.610161717727194	8914920.0733652	4779650.53346837	-0.0729884370113752	0.361602857281929	-0.201846958732599	0.841978870722588	21	2.47644338801301	2.40345495100164	0.867093190936312	1.01896921051446	0.411464770584576	0.583158452093509	0.2426334023238	4668226.563237	0.523641998449779	5005015.41087078
AEIVPVTTTVLDDKGDKK	Q921H8	Acaa1a Acaa1	Acaa1a	IPI00121833;	AY273811;AY304542;BC012400;	ENSMUST00000039784;	3-ketoacyl-CoA thiolase A, peroxisomal (EC 2.3.1.16) (Acetyl-CoA acyltransferase A) (Beta-ketothiolase A) (Peroxisomal 3-oxoacyl-CoA thiolase A)		NP_570934.1;	Mm.205266;	mmu:113868;	acetyl-CoA C-acetyltransferase activity; fatty acid metabolic process; mitochondrion; peroxisome	GO:0003985; GO:0006631; GO:0005739; GO:0005777	Lipid metabolism; fatty acid metabolism.	Thiolase family	Peroxisome.	0.131202516659392	0.17999065153016	0.728940728554487	0.467264335936573	139	-0.47387603955659	-0.342673522897197	1.09113533668182	2.23465261038245	4.71569023087437	2.17649661597531	6.35151673690373	2383380.39622965	1.13377259309552	2242872.36255514	0.958448860281676	2102167.9398003	2340106.4527282	0.240894486831491	0.167090308454825	1.44170232887337	0.151430071796679	153	-0.47387603955659	-0.232981552725097	1.06006916754334	2.23465261038245	4.71569023087437	2.14293642675397	9.1978802685829	2383380.39622965	1.13377259309552	1878135.60955083
AELATEEFLPVTPILEGFVILR	Q8VDM4	Psmd2	Psmd2	IPI00123494;	BC021508;BC024830;BC027388;BC027767;BC027822;BC028851;BC031128;	ENSMUST00000007212;	26S proteasome non-ATPase regulatory subunit 2 (26S proteasome regulatory subunit RPN1) (26S proteasome regulatory subunit S2) (26S proteasome subunit p97)		NP_598862.1;	Mm.243234;	mmu:21762;	enzyme regulator activity; proteasome accessory complex; regulation of catalytic activity; regulation of protein catabolic process	GO:0030234; GO:0022624; GO:0050790; GO:0042176		Proteasome subunit S2 family		0.0670889060105288	0.206893193775353	0.324268308620024	0.746304190413349	119	-0.230170805649499	-0.163081899638973	1.16118517014421	2.44763599633995	10.63399847532	2.19285363297097	13.4463336386531	4754287.6516757	1.66189259356619	4272741.98084477	1.47586623004846	2860767.09775429	2895074.02083756	0.114465547619112	0.181935550991879	0.629154373595852	0.530343615226818	131	-0.230170805649499	-0.115705258030384	1.06862939911729	2.44763599633995	10.63399847532	2.03158609446427	17.5582867109701	4754287.6516757	1.66189259356619	4192110.57993217
AELDDTPMR	Q8VIJ6	Sfpq	Sfpq	IPI00129430;	AY034062;AL606985;BC089305;AF272847;	ENSMUST00000030623;	Splicing factor, proline- and glutamine-rich (DNA-binding p52/p100 complex, 100 kDa subunit) (Polypyrimidine tract-binding protein-associated-splicing factor) (PSF) (PTB-associated-splicing factor)		NP_076092.1;	Mm.257276;Mm.482296;	mmu:71514;	DNA binding; DNA repair; RNA binding; alternative mRNA splicing, via spliceosome; cytoplasm; nuclear matrix; nucleotide binding; paraspeckles; regulation of transcription, DNA-dependent; transcription, DNA-dependent	GO:0003677; GO:0006281; GO:0003723; GO:0000380; GO:0005737; GO:0016363; GO:0000166; GO:0042382; GO:0006355; GO:0006351			Nucleus matrix. Cytoplasm.	0.279753889687198	0.12008721850715	2.32958921994302	0.0223829361092028	79	-0.886391082437921	-0.606637192750722	0.550308768805716	1.53458343300358	1.73127129030098	1.22643341078226	2.02169175487105	1958137.86813041	1.39381860212302	1662018.22029679	1.13138010027228	1404872.81856321	1469018.43146861	0.0142088812602996	0.125472091776279	0.113243360010563	0.910098526420282	87	-0.886391082437921	-0.872182201177622	0.601743013036664	1.53458343300358	1.73127129030098	1.24395602760769	1.42625706638831	1958137.86813041	1.39381860212302	1297073.71563187
AELDIATTPELQK	Q6PCM1	Kdm3a Jhdm2a Jmjd1a Kiaa0742	Kdm3a	IPI00460716;IPI00755968;	AK129204;BC026605;BC031158;BC031200;BC059264;AK144825;AK166797;DQ323991;	ENSMUST00000065509;ENSMUST00000167220;	Lysine-specific demethylase 3A (EC 1.14.11.-) (JmjC domain-containing histone demethylation protein 2A) (Jumonji domain-containing protein 1A)		NP_001033784.2;NP_766589.1;	Mm.260479;	mmu:104263;	androgen receptor signaling pathway; core promoter binding; cytoplasm; formaldehyde biosynthetic process; histone H3-K9 demethylation; histone H3-K9 dimethylation; hormone-mediated signaling pathway; iron ion binding; negative regulation of histone H3-K9 methylation; nucleus; oxidoreductase activity, acting on single donors with incorporation of molecular oxygen, incorporation of two atoms of oxy…	GO:0030521; GO:0001047; GO:0005737; GO:0046293; GO:0033169; GO:0036123; GO:0009755; GO:0005506; GO:0051573; GO:0005634; GO:0016702; GO:0045944; GO:0003700; GO:0007290; GO:0000976; GO:0006351		JHDM2 histone demethylase family	Cytoplasm. Nucleus.	-1.09303596040818	1.23679454313461	-0.883765186768951	0.387869312867698	19	-3.99713342421829	-5.09016938462647	2.83385230651135	2.73549243893566	0.684363554731885	2.78102666332628	0.546352479295806	309477.937874461	1.22961381812086	310140.919399314	1.87043091337096	251687.101522181	165812.550029109	0.0117229876340633	1.19424246828544	0.00981625419073722	0.992260545936779	21	-3.99713342421829	-3.98541043658423	2.86369283794105	2.73549243893566	0.684363554731885	2.97191486409793	0.745698570169116	309477.937874461	1.22961381812086	966078.378918315
AELEGLLGK	Q8JZU0	Nudt13	Nudt13	IPI00110522;	AK014204;BC037091;	ENSMUST00000022343;	Nucleoside diphosphate-linked moiety X motif 13 (Nudix motif 13) (EC 3.-.-.-)		NP_080617.2;	Mm.317636;	mmu:67725;	hydrolase activity; metal ion binding; mitochondrion	GO:0016787; GO:0046872; GO:0005739				0.189141392539464	0.220620515066404	0.857315524272687	0.396508316553559	39	0.626570888299047	0.815712280838511	0.714892175447275	1.09343699176719	1.74511298272339	1.10668563454872	1.35671076744254	4338830.32925856	1.32780991468201	6689418.250239	1.61598848351535	3267659.23441509	4139520.99193625	-0.135109574891005	0.166097472029099	-0.813435467984334	0.420449926358412	43	0.626570888299047	0.491461313408042	0.563263932332134	1.09343699176719	1.74511298272339	0.721835205628386	1.46875285182228	4338830.32925856	1.32780991468201	1307191.84052916
AELGFLESCLR	Q9JHK4	Rabggta	Rabggta	IPI00271905;IPI00620701;	AF127654;AF127655;AF127656;AF127658;AF127659;AF127660;AF127662;AK002625;	ENSMUST00000062861;ENSMUST00000163889;ENSMUST00000169237;	Geranylgeranyl transferase type-2 subunit alpha (EC 2.5.1.60) (Geranylgeranyl transferase type II subunit alpha) (Rab geranyl-geranyltransferase subunit alpha) (Rab GG transferase alpha) (Rab GGTase alpha) (Rab geranylgeranyltransferase subunit alpha)		NP_062392.1;	Mm.87216;	mmu:56187;	Rab geranylgeranyltransferase activity; metal ion binding; protein geranylgeranylation; zinc ion binding	GO:0004663; GO:0046872; GO:0018344; GO:0008270		Protein prenyltransferase subunit alpha family		-0.235557020051257	0.34580143283663	-0.681191567423446	0.499775310338697	39	0.920656369465084	0.685099349413825	1.12052470967605	2.665661736043	2.89539270508908	2.68400057241248	3.91768080747548	9216448.69492412	1.15590751399989	8091467.53495324	1.14114411621438	7973344.39243465	7090662.27480173	0.0727048400321165	0.263057262634812	0.276384081944351	0.783577215605143	43	0.920656369465084	0.993361209497199	0.892070579823471	2.665661736043	2.89539270508908	2.76000634048377	2.77845190057378	9216448.69492412	1.15590751399989	8887224.41248406
AELGSVQDKVNAKLGQMESK	Q69ZU8	Ankrd6 Kiaa0957	Ankrd6	IPI00420230;IPI00649172;	AY026320;AK173070;AL831774;AL831774;CH466538;BC065177;	ENSMUST00000035719;ENSMUST00000084748;ENSMUST00000084749;ENSMUST00000084750;	Ankyrin repeat domain-containing protein 6 (Diversin)		NP_001012453.1;NP_001012454.1;NP_536719.2;	Mm.214766;	mmu:140577;	cytoplasm; negative regulation of canonical Wnt receptor signaling pathway; nucleus; positive regulation of Wnt receptor signaling pathway, planar cell polarity pathway	GO:0005737; GO:0090090; GO:0005634; GO:2000096				0.532273688220965	0.219459156902812	2.42538837628308	0.0254239469051912	19	1.52318982757757	2.05546351579854	0.502844099229163	0.446890500028947	0.293391205703931	0.552308361739476	0.268702585813063	2457844.80811394	0.574193115688169	2774021.14573758	0.435223721178265	4280519.46455022	6373782.05909269	-0.301497615167507	0.222022077622175	-1.35796231796632	0.188888345024345	21	1.52318982757757	1.22169221241007	0.532390239365906	0.446890500028947	0.293391205703931	0.619536265756452	0.507113215147927	2457844.80811394	0.574193115688169	1252832.96338856
AEMDAAVESCK	Q9EQ20	Aldh6a1	Aldh6a1	IPI00461964;	AF297860;AK033587;AK147146;AK155814;AK169915;AK170305;AK171581;AK171896;BC033440;	ENSMUST00000085192;	Methylmalonate-semialdehyde dehydrogenase [acylating], mitochondrial (MMSDH) (Malonate-semialdehyde dehydrogenase [acylating]) (EC 1.2.1.18) (EC 1.2.1.27) (Aldehyde dehydrogenase family 6 member A1)		NP_598803.1;	Mm.247510;	mmu:104776;	beta-alanine catabolic process; brown fat cell differentiation; malonate-semialdehyde dehydrogenase (acetylating) activity; methylmalonate-semialdehyde dehydrogenase (acylating) activity; mitochondrion; nucleus; thiolester hydrolase activity; thymine catabolic process; valine catabolic process	GO:0019484; GO:0050873; GO:0018478; GO:0004491; GO:0005739; GO:0005634; GO:0016790; GO:0006210; GO:0006574		Aldehyde dehydrogenase family	Mitochondrion.	0.0702495006414984	0.0485174066435472	1.44792365258957	0.147979461506608	919	1.54766131927693	1.61791081991842	0.753973611939303	2.20227117973321	1.42296712614238	2.39192064070157	1.47840079394621	25520345.1757692	2.06572537460817	32303755.2178356	2.19552183992967	12354181.0007586	14713474.7786751	0.0931449828602992	0.0438308280066444	2.12510205935829	0.0338201098627684	1011	1.54766131927693	1.64080630213723	0.712840741295948	2.20227117973321	1.42296712614238	2.26802352744064	1.38226158961386	25520345.1757692	2.06572537460817	21116445.7958008
AEMDLSGR	Q8BH61	F13a1 F13a	F13a1	IPI00402967;	AK036403;AK049092;AK165311;BC040274;	ENSMUST00000037491;ENSMUST00000164727;	Coagulation factor XIII A chain (Coagulation factor XIIIa) (EC 2.3.2.13) (Protein-glutamine gamma-glutamyltransferase A chain) (Transglutaminase A chain)		NP_001159863.1;NP_083060.2;	Mm.235105;	mmu:74145;	blood coagulation; cytoplasm; extracellular region; metal ion binding; peptide cross-linking; protein-glutamine gamma-glutamyltransferase activity	GO:0007596; GO:0005737; GO:0005576; GO:0046872; GO:0018149; GO:0003810		Transglutaminase superfamily, Transglutaminase family	Cytoplasm. Secreted.	0.092146175784098	0.0788197025880308	1.16907540574875	0.243644154629298	219	-1.11561326240414	-1.02346708662004	0.598977882356929	1.13989161509146	1.02176233781499	1.32855776402099	1.29809525034019	755998.406782031	0.889005543339236	814071.607473654	0.808606371158876	850386.606074906	1006758.83409989	-0.382660461748549	0.0844509745459084	-4.53115507317836	9.23751719787447e-06	241	-1.11561326240414	-1.49827372415269	0.671637490902585	1.13989161509146	1.02176233781499	1.41040070753875	0.941350492104753	755998.406782031	0.889005543339236	600069.137299554
AEMEDLVSSKDDVGKNVHELEK	O08638	Myh11	Myh11	IPI00114894;IPI00227865;	D85923;D85924;L25860;S81516;		Myosin-11 (Myosin heavy chain 11) (Myosin heavy chain, smooth muscle isoform) (SMMHC)	I52863;JC5420;JC5421;		Mm.250705;		ATP binding; cardiac muscle fiber development; elastic fiber assembly; melanosome; motor activity; myofibril; myosin filament; skeletal muscle myosin thick filament assembly; smooth muscle contraction; structural constituent of muscle	GO:0005524; GO:0048739; GO:0048251; GO:0042470; GO:0003774; GO:0030016; GO:0032982; GO:0030241; GO:0006939; GO:0008307			Melanosome. Cytoplasm › myofibril.	0.0590533939914453	0.0667206878626733	0.88508371066244	0.376391786718611	759	-1.04280410929686	-0.983750715305419	0.942392812302397	2.3637789855791	2.26675265709582	2.28538117848906	2.32313038550577	3502274.31079643	1.82175077091153	3119226.76146931	1.58441151236376	1922477.1943113	1968697.35995277	0.263110482645655	0.0644868661457797	4.08006309456665	4.93401202263218e-05	835	-1.04280410929686	-0.779693626651212	0.953228443401088	2.3637789855791	2.26675265709582	2.25344291674069	2.89016459762437	3502274.31079643	1.82175077091153	2946695.79529541
AEMLQALASLEAVLLQTVYNTK	Q05793	Hspg2	Hspg2	IPI00113824;	M77174;J04054;J04055;		Basement membrane-specific heparan sulfate proteoglycan core protein (HSPG) [Cleaved into: Endorepellin; LG3 peptide]	S18252;	NP_032331.2;	Mm.273662;	mmu:15530;	Golgi lumen; angiogenesis; basal lamina; brain development; cardiac muscle tissue development; cartilage development involved in endochondral bone morphogenesis; chondrocyte differentiation; embryonic skeletal system morphogenesis; endochondral ossification; extracellular matrix organization; metal ion binding; protein localization	GO:0005796; GO:0001525; GO:0005605; GO:0007420; GO:0048738; GO:0060351; GO:0002062; GO:0048704; GO:0001958; GO:0030198; GO:0046872; GO:0008104			Secreted › extracellular space › extracellular matrix › basement membrane.	-0.10157196789694	0.047472230095319	-2.13960809704947	0.0325615611824931	1379	-0.344428476400052	-0.44600044429699	0.903532608873775	1.78998532753862	5.19697252169	1.8983583880356	4.25640470163185	3993726.10796765	1.78715252178062	4082305.73938712	1.76060918706846	2234686.77647531	2318689.33172185	0.038204492854323	0.0393267273707216	0.971463821389977	0.33147222751986	1517	-0.344428476400052	-0.306223983545733	0.783332733867243	1.78998532753862	5.19697252169	1.66746653257377	5.44525126107485	3993726.10796765	1.78715252178062	3850959.13149532
AENEALAMQK	Q61335	Bcap31 Bap31	Bcap31	IPI00230422;	X81816;AK008043;AK011500;AL805924;CH466650;BC002106;	ENSMUST00000002091;	B-cell receptor-associated protein 31 (BCR-associated protein 31) (Bap31) (p28)	S71116;	NP_036190.2;	Mm.17;	mmu:27061;	Golgi membrane; apoptotic process; endoplasmic reticulum membrane; endoplasmic reticulum-Golgi intermediate compartment membrane; immune response; integral to membrane; intracellular protein transport; plasma membrane; spermatogenesis; vesicle-mediated transport	GO:0000139; GO:0006915; GO:0005789; GO:0033116; GO:0006955; GO:0016021; GO:0006886; GO:0005886; GO:0007283; GO:0016192		BCAP29/BCAP31 family	Endoplasmic reticulum membrane; Multi-pass membrane protein. Endoplasmic reticulum-Golgi intermediate compartment membrane; Multi-pass membrane protein.	-0.758102698898257	0.319825953073923	-2.37036016499584	0.0210579566137934	59	-0.35067934732806	-1.10878204622632	1.26926990198672	3.67247542545271	10.4724599650207	4.21887632982597	3.80496450513849	7734604.48991246	1.44546558483347	3986217.18616416	1.10584462787184	5350943.37151138	3604681.06069793	-0.595888107884212	0.290676898619412	-2.0500016021721	0.0444022927054492	65	-0.35067934732806	-0.946567455212273	1.20727183123551	3.67247542545271	10.4724599650207	4.10739457314942	4.33925184151648	7734604.48991246	1.44546558483347	5320200.66598131
AENFFILR	P59999	Arpc4 Arc20	Arpc4	IPI00138691;	AJ278129;AK017993;AK039215;AK077325;AK133626;AK136082;AK150690;AK153380;AK166440;	ENSMUST00000156898;	Actin-related protein 2/3 complex subunit 4 (Arp2/3 complex 20 kDa subunit) (p20-ARC)		NP_001163956.1;NP_001163957.1;NP_080828.1;	Mm.289306;Mm.472172;	mmu:68089;	Arp2/3 protein complex; actin filament polymerization; cell projection; cytoplasm	GO:0005885; GO:0030041; GO:0042995; GO:0005737		ARPC4 family	Cytoplasm › cytoskeleton. Cell projection.	-0.0923853059516035	0.133002822297393	-0.69461162068449	0.489336571943872	79	-1.02820373144015	-1.12058903739175	0.609495500820564	1.06369581695565	1.03451853405141	0.802522182942294	0.716161015469345	614782.354118884	0.720985869867189	434030.798604032	0.560026545389451	852696.813922487	775018.259718743	-0.0748867885737243	0.113831611037556	-0.657873396424276	0.512356469607388	87	-1.02820373144015	-1.10309052001388	0.545917228563385	1.06369581695565	1.03451853405141	0.841527734815591	0.762881848359104	614782.354118884	0.720985869867189	439095.504781958
AENGKLVINGKPITIFQER	P16858	Gapdh Gapd	Gapdh	IPI00273646;	M32599;AK002273;AK081405;AK140794;AK144690;AK146435;AK147738;AK147891;AK160399;AK160753;AK164415;AK168217;AL662926;BC082592;BC083065;BC083079;BC083080;BC083149;BC085274;BC085275;BC085315;BC091768;BC092252;BC092264;BC092267;BC092294;BC093508;BC094037;BC095932;BC096440;BC096590;BC110311;BC145810;BC145812;DQ403054;	ENSMUST00000104945;ENSMUST00000109588;ENSMUST00000117757;ENSMUST00000118875;	Glyceraldehyde-3-phosphate dehydrogenase (GAPDH) (EC 1.2.1.12) (Peptidyl-cysteine S-nitrosylase GAPDH) (EC 2.6.99.-)	DEMSG;	NP_032110.1;XP_001476757.1;	Mm.304088;Mm.309092;Mm.317779;Mm.343110;Mm.392463;Mm.458138;Mm.458416;	mmu:100042025;mmu:14433;	NAD binding; NADP binding; cytosol; glyceraldehyde-3-phosphate dehydrogenase (NAD+) (phosphorylating) activity; glycolysis; microtubule binding; microtubule cytoskeleton; microtubule cytoskeleton organization; negative regulation of translation; neuron apoptotic process; nucleus; peptidyl-cysteine S-nitrosylase activity; peptidyl-cysteine S-trans-nitrosylation; protein stabilization	GO:0051287; GO:0050661; GO:0005829; GO:0004365; GO:0006096; GO:0008017; GO:0015630; GO:0000226; GO:0017148; GO:0051402; GO:0005634; GO:0035605; GO:0035606; GO:0050821	Carbohydrate degradation; glycolysis; pyruvate from D-glyceraldehyde 3-phosphate: step 1/5.	Glyceraldehyde-3-phosphate dehydrogenase family	Cytoplasm › cytosol. Nucleus. Cytoplasm › cytoskeleton.	-0.146635179844592	0.0791678072408656	-1.85220716545122	0.0643475794046684	838	1.45120232638419	1.2887303583348	1.1755819603854	4.07103263074371	2.8052825968706	3.99728386994177	3.10172243874719	91231051.0617678	2.17845647924994	80306261.4022646	2.05262104186714	41878757.7033347	39123764.0871181	-0.0833962988939993	0.0697814963362269	-1.19510619967466	0.232352852846571	922	1.45120232638419	1.35131165855848	1.08442331276484	4.07103263074371	2.8052825968706	4.04620020665617	2.99427610279961	91231051.0617678	2.17845647924994	70074718.1260085
AEPPQCTSLAWSADGQTLFAGYTDNLVR	P68040	Gnb2l1 Gnb2-rs1	Gnb2l1	IPI00317740;	D29802;X75313;AK002493;AK012242;AK017772;AK051226;AK159797;AK160528;AK160739;AK161234;AK166417;AK166786;AK166800;AK166889;AK166945;AK168086;AK168096;AK168196;AK168349;AL645849;CH466575;BC046760;AF295529;	ENSMUST00000020640;	Guanine nucleotide-binding protein subunit beta-2-like 1 (12-3) (Receptor for activated C kinase) (Receptor of activated protein kinase C 1) (RACK1) (p205)	S38398;	NP_032169.1;	Mm.5305;	mmu:14694;	SH2 domain binding; apoptotic process; cell cycle; cytoskeleton; dendrite; gastrulation; intracellular signal transduction; ion channel inhibitor activity; midbody; negative regulation of Wnt receptor signaling pathway; negative regulation of cell growth; negative regulation of phagocytosis; negative regulation of translation; neuronal cell body; nucleus; perikaryon; perinuclear region of cytopla…	GO:0042169; GO:0006915; GO:0007049; GO:0005856; GO:0030425; GO:0007369; GO:0035556; GO:0008200; GO:0030496; GO:0030178; GO:0030308; GO:0050765; GO:0017148; GO:0043025; GO:0005634; GO:0043204; GO:0048471; GO:0001891; GO:0043547; GO:0043065; GO:0030335; GO:2000543; GO:2001244; GO:0032436; GO:0032464; GO:0001934; GO:0005080; GO:0008104; GO:0030292; GO:0004872; GO:0030971; GO:0051726; GO:0051302; GO:…		WD repeat G protein beta family	Cell membrane; Peripheral membrane protein. Cytoplasm. Cytoplasm › perinuclear region. Cytoplasm › cytoskeleton. Nucleus. Perikaryon. Cell projection › dendrite.	0.0626744360966148	0.109756057495322	0.571033959554225	0.56878284140171	159	0.461847158546094	0.524521594642708	0.711300548706725	1.95237011483712	4.22730784137166	2.01093668586686	3.83384918067418	21229000.3126662	2.59380280275038	19876894.8830088	2.28730931365897	8184508.20168583	8690077.36046513	-0.0223632371463016	0.115496020163934	-0.193627772754068	0.846691910091962	175	0.461847158546094	0.439483921399791	0.783332120489492	1.95237011483712	4.22730784137166	1.89177904113019	4.30454664895299	21229000.3126662	2.59380280275038	19929789.0505052
AEQASHSPK	Q8JZN3	Kcnj14 Irk4	Kcnj14	IPI00170349;	AK030711;AK044725;AK080732;BC029692;BC031753;	ENSMUST00000071937;	ATP-sensitive inward rectifier potassium channel 14 (Inward rectifier K(+) channel Kir2.4) (IRK-4) (Potassium channel, inwardly rectifying subfamily J member 14)		NP_666075.1;	Mm.68170;	mmu:211480;	integral to membrane; inward rectifier potassium channel activity	GO:0016021; GO:0005242		Inward rectifier-type potassium channel (TC 1.A.2.1) family, KCNJ14 subfamily	Membrane; Multi-pass membrane protein.	-0.130418441371706	0.162231770625106	-0.803901978442216	0.426326655810375	39	1.47270355041293	1.34228510904122	0.525691019232446	1.43758849307257	0.976156058474553	1.59542651490319	1.18858989357543	6357703.85155318	1.03746006649278	7288272.36532387	1.15847497394573	6128143.19981098	6291264.40297648	0.212128078401644	0.137195974575048	1.54616838474082	0.129392788286756	43	1.47270355041293	1.68483162881457	0.46525418596222	1.43758849307257	0.976156058474553	1.68249831827917	0.998615107589685	6357703.85155318	1.03746006649278	9140991.74696104
AEQFYCGDTEGKK	Q60597	Ogdh Kiaa4192	Ogdh	IPI00420882;IPI00626237;IPI00719841;IPI00845652;	AK147289;AK150009;AK169286;AK220536;AL607152;AL607152;AL607152;BC025040;BC013670;BC029143;BC031165;BC049104;BC057354;U02971;	ENSMUST00000003461;ENSMUST00000081894;ENSMUST00000093350;ENSMUST00000101554;	2-oxoglutarate dehydrogenase, mitochondrial (EC 1.2.4.2) (2-oxoglutarate dehydrogenase complex component E1) (OGDC-E1) (Alpha-ketoglutarate dehydrogenase)	A41911;	NP_001239211.1;NP_001239212.1;NP_001239216.1;NP_001239217.1;NP_035086.2;	Mm.276348;Mm.479411;Mm.490272;	mmu:18293;	cerebellar cortex development; generation of precursor metabolites and energy; glycolysis; hippocampus development; mitochondrial matrix; mitochondrial membrane; olfactory bulb mitral cell layer development; oxoglutarate dehydrogenase (NAD+) activity; oxoglutarate dehydrogenase (succinyl-transferring) activity; pyramidal neuron development; striatum development; tangential migration from the subv…	GO:0021695; GO:0006091; GO:0006096; GO:0021766; GO:0005759; GO:0031966; GO:0061034; GO:0034602; GO:0004591; GO:0021860; GO:0021756; GO:0022028; GO:0021794; GO:0030976; GO:0006099		Alpha-ketoglutarate dehydrogenase family	Mitochondrion matrix.	-0.00931888942648088	0.0411632540397859	-0.226388550756308	0.820928167294279	1599	1.77935902954134	1.77004014011487	0.843595675024747	2.95850281815926	1.66267895856962	3.01298163507602	1.70221090855064	33837640.7769718	1.63481038814414	33512590.2490118	1.54168728098406	20698205.1388753	21737605.7144486	0.0437545381435079	0.0403289709259852	1.08494060569533	0.278096634299254	1759	1.77935902954134	1.82311356768486	0.864960063896896	2.95850281815926	1.66267895856962	3.06996903120667	1.68391541022054	33837640.7769718	1.63481038814414	33598801.0812294
AEQPHTFHPALLQFLVCPLSK	Q9D1C3	Pyurf Pigy Prey	Pyurf	IPI00133584;	AK003713;AK029193;AK032381;BC029232;	ENSMUST00000053386;	Protein preY, mitochondrial		NP_079850.1;	Mm.44201;	mmu:66459;	GPI anchor biosynthetic process; endoplasmic reticulum membrane; glycosylphosphatidylinositol-N-acetylglucosaminyltransferase (GPI-GnT) complex; mitochondrion; plasma membrane; positive regulation of metabolic process	GO:0006506; GO:0005789; GO:0000506; GO:0005739; GO:0005886; GO:0009893		PREY family	Mitochondrion.	-0.429248138678315	0.39497101996077	-1.08678388283006	0.290728016881109	19	-0.972996267911533	-1.40224440658985	0.904992298142071	0.841013572493768	0.86435436622891	0.940471721705485	0.670690299983182	664725.550231921	0.781209336704698	322116.753881594	0.528025804806758	850892.992441528	610039.795307881	0.487718591100243	0.398840231284823	1.22284201252493	0.234935948856077	21	-0.972996267911533	-0.485277676811291	0.956385276980546	0.841013572493768	0.86435436622891	1.07464156548293	2.21448794542598	664725.550231921	0.781209336704698	1147489.16352441
AEQQTADQLLAR	P02468	Lamc1 Lamb-2 Lamc-1	Lamc1	IPI00400016;	X05211;J03484;J02930;J03749;		Laminin subunit gamma-1 (Laminin B2 chain) (Laminin-1 subunit gamma) (Laminin-10 subunit gamma) (Laminin-11 subunit gamma) (Laminin-2 subunit gamma) (Laminin-3 subunit gamma) (Laminin-4 subunit gamma) (Laminin-6 subunit gamma) (Laminin-7 subunit gamma) (Laminin-8 subunit gamma) (Laminin-9 subunit gamma) (S-laminin subunit gamma) (S-LAM gamma)	MMMSB2;S55783;		Mm.1249;		basement membrane; cell adhesion; cell migration; extracellular matrix disassembly; extracellular matrix structural constituent; hemidesmosome assembly; protein complex assembly	GO:0005604; GO:0007155; GO:0016477; GO:0022617; GO:0005201; GO:0031581; GO:0006461			Secreted › extracellular space › extracellular matrix › basement membrane.	0.0948859831205755	0.0384407790245072	2.46836785123638	0.0137165681802088	1159	0.18190422697073	0.276790210091309	0.670788840334533	1.77485186566628	9.75706774506054	1.7497456998402	6.32155920277305	12729494.4860036	3.03789364547432	15049773.1007104	3.14892939273307	4190237.04301408	4779330.12262562	0.266492028558669	0.0388001778138313	6.86831977516534	1.01259016388478e-11	1275	0.18190422697073	0.448396255529399	0.708568163101739	1.77485186566628	9.75706774506054	1.71964312198933	3.83509697233985	12729494.4860036	3.03789364547432	13949109.7785296
AEQSLQAAIK	Q6NZL8	Scube1	Scube1	IPI00227650;IPI00626998;IPI00798459;	AF276425;AK041590;BC066066;	ENSMUST00000016907;ENSMUST00000171496;	Signal peptide, CUB and EGF-like domain-containing protein 1		NP_001258401.1;NP_073560.2;	Mm.40393;	mmu:64706;	calcium ion binding; external side of plasma membrane; extracellular space; extrinsic to plasma membrane; protein heterodimerization activity; protein homooligomerization	GO:0005509; GO:0009897; GO:0005615; GO:0019897; GO:0046982; GO:0051260			Secreted. Cell membrane; Peripheral membrane protein.	0.285175145937821	0.303285290498359	0.940286769164506	0.358872207391424	19	-1.29385391481944	-1.00867876888162	0.694913900437701	0.66815255765711	0.516404943405341	0.686391292235917	0.680485515717715	373734.019249547	0.592454271194646	556635.680863821	0.676224936702986	630823.402616267	823151.662489353	-0.325684678489175	0.259814858811021	-1.25352599146789	0.223791053941683	21	-1.29385391481944	-1.61953859330861	0.623014145055469	0.66815255765711	0.516404943405341	0.543166522011326	0.335383500124979	373734.019249547	0.592454271194646	154348.167881132
AERGGSSGEELEDEEPVK	Q3UMU9	Hdgfrp2	Hdgfrp2	IPI00116442;IPI00875101;IPI00885518;	D63850;AK143616;AK144669;AK146813;AK146918;BC003741;	ENSMUST00000002911;	Hepatoma-derived growth factor-related protein 2 (HRP-2)	JC5662;	NP_032259.1;	Mm.279188;	mmu:15193;	DNA binding; nucleus; transcription, DNA-dependent	GO:0003677; GO:0005634; GO:0006351		HDGF family		0.316884127739057	0.336292384143265	0.942287552976698	0.357873391571221	19	0.554054614557917	0.870938742296974	0.77054265298684	0.902807797485776	1.62945632752491	0.350658370129491	0.402621163923287	2149986.94546996	0.814347804821473	727298.310338276	0.271092200528676	2640133.53107925	2682844.83625837	-0.208875086363067	0.316779714169951	-0.659370145939985	0.516824344048895	21	0.554054614557917	0.34517952819485	0.759611069581121	0.902807797485776	1.62945632752491	0.486517436201376	1.40946202327139	2149986.94546996	0.814347804821473	913127.401659753
AESFFQTK	Q8R146	Apeh	Apeh	IPI00279218;IPI00387245;	CH466560;BC025494;BC026594;BC034199;	ENSMUST00000081309;	Acylamino-acid-releasing enzyme (AARE) (EC 3.4.19.1) (Acyl-peptide hydrolase) (APH) (Acylaminoacyl-peptidase)		NP_666338.2;	Mm.219639;	mmu:235606;	cytoplasm; proteolysis; serine-type endopeptidase activity	GO:0005737; GO:0006508; GO:0004252		Peptidase S9C family	Cytoplasm.	-0.288610630586689	0.132745587158454	-2.17416365217612	0.0326861421392324	79	-0.138420608614427	-0.427031239201116	0.608316701324975	0.885029820571672	6.39377206494548	0.905261628489046	2.11989556123013	921058.011405053	0.63580714404687	872807.201094121	0.669425517666246	1448643.69648724	1303815.25361762	-0.356474432640125	0.114029220715178	-3.12616740169193	0.00240783602675312	87	-0.138420608614427	-0.494895041254552	0.546864931284637	0.885029820571672	6.39377206494548	0.662029954652098	1.33771789867577	921058.011405053	0.63580714404687	572274.965328919
AESLIFR	Q9CQ65	Mtap	Mtap	IPI00132096;	AB056100;AK005064;AK011421;AK167319;BC003858;	ENSMUST00000058030;	S-methyl-5'-thioadenosine phosphorylase (EC 2.4.2.28) (5'-methylthioadenosine phosphorylase) (MTA phosphorylase) (MTAP) (MTAPase)		NP_077753.1;	Mm.28500;	mmu:66902;	L-methionine salvage from methylthioadenosine; S-methyl-5-thioadenosine phosphorylase activity; cytoplasm; nucleus; phosphorylase activity; purine ribonucleoside salvage; response to testosterone stimulus	GO:0019509; GO:0017061; GO:0005737; GO:0005634; GO:0004645; GO:0006166; GO:0033574	Amino-acid biosynthesis; L-methionine biosynthesis via salvage pathway; S-methyl-5-thio-alpha-D-ribose 1-phosphate from S-methyl-5'-thioadenosine (phosphorylase route): step 1/1.	PNP/MTAP phosphorylase family, MTAP subfamily	Cytoplasm. Nucleus.	0.0805384455627688	0.0856825709978093	0.939962989262169	0.348867129820101	139	0.26527151286179	0.345809958424558	0.519422982019666	0.878880633872183	3.31313613131951	0.927902398121424	2.68327263433582	1712823.92578876	0.832807014267532	1500098.33528437	0.667950367789961	2056687.67967236	2245823.05455977	0.104030660524117	0.0779928744861759	1.33384826767164	0.184235743625272	153	0.26527151286179	0.369302173385907	0.494809317760195	0.878880633872183	3.31313613131951	0.909759001951264	2.46345423210007	1712823.92578876	0.832807014267532	1259344.04270497
AESMLQQADK	Q99K51	Pls3	Pls3	IPI00115528;	AB182243;AK160501;AL805920;AL805920;CH466576;BC005459;	ENSMUST00000033547;ENSMUST00000114057;ENSMUST00000114059;ENSMUST00000137192;	Plastin-3 (T-plastin)		NP_001159925.1;NP_001159926.1;NP_663604.1;	Mm.28777;	mmu:102866;	calcium ion binding; cytoplasm	GO:0005509; GO:0005737			Cytoplasm.	0.119344051033212	0.23971639935591	0.497855179511603	0.620436756665065	59	0.283180576376208	0.40252462740942	0.951344966819374	1.27085927122087	4.48780522832373	1.56740608433457	3.89393835210065	2763590.02999028	1.09104344333197	5538728.21199822	1.45306403898849	2532978.90829211	3811757.81891474	-0.0943034189403675	0.19137585825472	-0.492765491950664	0.623838823996789	65	0.283180576376208	0.18887715743584	0.79484363548254	1.27085927122087	4.48780522832373	1.18329569811407	6.26489573529304	2763590.02999028	1.09104344333197	2598773.96484286
AESNQDPAPR	Q9WVI9	Mapk8ip1 Ib1 Jip1 Mapk8ip Prkm8ip	Mapk8ip1	IPI00230316;IPI00230317;IPI00230318;IPI00321873;IPI00465532;	AF003115;AF109768;AF109769;AF109770;AF109771;AF054611;AF332075;AF332076;	ENSMUST00000050312;ENSMUST00000111279;	C-Jun-amino-terminal kinase-interacting protein 1 (JIP-1) (JNK-interacting protein 1) (Islet-brain-1) (IB-1) (JNK MAP kinase scaffold protein 1) (Mitogen-activated protein kinase 8-interacting protein 1)	T03038;	NP_035292.2;	Mm.2720;	mmu:19099;	JUN phosphorylation; MAP-kinase scaffold activity; axonal growth cone; cell body; cytosol; dendritic growth cone; dentate gyrus mossy fiber; endoplasmic reticulum membrane; membrane; mitochondrial membrane; negative regulation of JNK cascade; negative regulation of JUN kinase activity; negative regulation of apoptotic process; nucleus; perinuclear region of cytoplasm; regulation of JNK cascade; r…	GO:0007258; GO:0005078; GO:0044295; GO:0044297; GO:0005829; GO:0044294; GO:0044302; GO:0005789; GO:0016020; GO:0031966; GO:0046329; GO:0043508; GO:0043066; GO:0005634; GO:0048471; GO:0046328; GO:0006355; GO:0045202; GO:0016192		JIP scaffold family	Cytoplasm. Cytoplasm › perinuclear region. Nucleus. Endoplasmic reticulum membrane. Mitochondrion membrane.	0.117709833748662	0.254504949332601	0.462505087061519	0.648971936790968	19	5.43247457603877	5.55018440978743	0.583144097528772	0.557927030066536	0.102702188893328	0.580568476666135	0.104603457074748	28760644.9476302	0.460611853751342	31028138.2662989	0.429420912039353	62440088.576523	72255769.0983046	-0.734993211921166	0.243436998521901	-3.01923379101736	0.00652822896491454	21	5.43247457603877	4.6974813641176	0.583741415725982	0.557927030066536	0.102702188893328	0.605410798681535	0.128879872372896	28760644.9476302	0.460611853751342	14397576.0003147
AETPGPQIK	O35685	Nudc	Nudc	IPI00132942;	X81443;Y15522;AK032673;AK146323;BC011253;	ENSMUST00000030665;	Nuclear migration protein nudC (Nuclear distribution protein C homolog) (Silica-induced gene 92 protein) (SIG-92)		NP_035078.1;	Mm.69;	mmu:18221;	Golgi apparatus; cell division; microtubule; mitosis; nuclear migration; nucleus; response to peptide hormone stimulus	GO:0005794; GO:0051301; GO:0005874; GO:0007067; GO:0007097; GO:0005634; GO:0043434		NudC family	Cytoplasm › cytoskeleton. Nucleus.	0.0397133181483038	0.157953060091905	0.2514248101632	0.802006840984961	99	-0.862637269582597	-0.822923951434293	0.809268615047205	1.20313817665296	1.39472083931073	0.972729855716142	1.18204100636608	621402.303235311	0.647621323951965	533244.905823085	0.538333286417719	959514.889724972	990547.899000461	-0.00501277796724514	0.153480919933209	-0.0326605937039378	0.974004980451318	109	-0.862637269582597	-0.867650047549842	0.822949750912466	1.20313817665296	1.39472083931073	1.22880780585129	1.41624818591473	621402.303235311	0.647621323951965	497483.985364815
AEVAAGDHPTDAEMKGER	P30416	Fkbp4 Fkpb52	Fkbp4	IPI00230139;	X70887;AK083912;AK160202;BC003447;X17069;X17068;	ENSMUST00000032508;	Peptidyl-prolyl cis-trans isomerase FKBP4 (PPIase FKBP4) (EC 5.2.1.8) (52 kDa FK506-binding protein) (52 kDa FKBP) (FKBP-52) (59 kDa immunophilin) (p59) (FK506-binding protein 4) (FKBP-4) (FKBP59) (HSP-binding immunophilin) (HBI) (Immunophilin FKBP52) (Rotamase) [Cleaved into: Peptidyl-prolyl cis-trans isomerase FKBP4, N-terminally processed]	JN0873;	NP_034349.1;	Mm.12758;	mmu:14228;	ATP binding; FK506 binding; GTP binding; androgen receptor signaling pathway; axonal growth cone; copper ion transport; cytosol; embryo implantation; glucocorticoid receptor binding; heat shock protein binding; male sex differentiation; membrane; microtubule; negative regulation of microtubule polymerization or depolymerization; negative regulation of neuron projection development; nucleus; pepti…	GO:0005524; GO:0005528; GO:0005525; GO:0030521; GO:0044295; GO:0006825; GO:0005829; GO:0007566; GO:0035259; GO:0031072; GO:0046661; GO:0016020; GO:0005874; GO:0031111; GO:0010977; GO:0005634; GO:0003755; GO:0051219; GO:0030850; GO:0031503; GO:0006457; GO:0006463			Cytoplasm › cytosol. Mitochondrion. Nucleus. Cytoplasm › cytoskeleton.	0.198242285778667	0.109735398620824	1.806548190194	0.0719933675615654	259	0.892359097025729	1.09060138280439	0.906563174158128	1.96922896398612	2.2067673995252	2.10151457416163	1.92693188115878	8235306.06267479	1.37241987317707	16323547.5779685	1.90778193394627	6000573.31114752	8556296.33948942	0.111137336803845	0.0962291630372812	1.15492365615596	0.249089102289379	285	0.892359097025729	1.00349643382958	0.831978890032349	1.96922896398612	2.2067673995252	1.8116500990319	1.80533785468297	8235306.06267479	1.37241987317707	8176764.59763747
AEVGVPAEFGIWTR	Q8BTM8	Flna Fln Fln1	Flna	IPI00131138;IPI00387373;	AK044856;AK089195;AK089311;AL807376;BC004061;BC054432;AF034129;AF353668;AF353671;	ENSMUST00000033699;	Filamin-A (FLN-A) (Actin-binding protein 280) (ABP-280) (Alpha-filamin) (Endothelial actin-binding protein) (Filamin-1) (Non-muscle filamin)		NP_034357.2;	Mm.295533;	mmu:192176;	Fc-gamma receptor I complex binding; Myb complex; Rac GTPase binding; actin crosslink formation; actin cytoskeleton; actin cytoskeleton reorganization; actin filament binding; adenylate cyclase-inhibiting dopamine receptor signaling pathway; cell cortex; cilium assembly; cytoplasm; cytoplasmic sequestering of protein; early endosome to late endosome transport; epithelial to mesenchymal transition…	GO:0034988; GO:0031523; GO:0048365; GO:0051764; GO:0015629; GO:0031532; GO:0051015; GO:0007195; GO:0005938; GO:0042384; GO:0005737; GO:0051220; GO:0045022; GO:0001837; GO:0045184; GO:0001948; GO:0042177; GO:0043433; GO:0005634; GO:0005886; GO:0043123; GO:0042993; GO:0005080; GO:0034394; GO:0050821; GO:0043113; GO:0004871; GO:0090307; GO:0005802; GO:0008134		Filamin family	Cytoplasm › cell cortex. Cytoplasm › cytoskeleton.	-0.661010543970634	0.0722646584132818	-9.1470790630506	2.154623730494e-19	1319	-0.774446749303456	-1.4354572932741	1.34517124057175	2.2236779319116	2.87131159619637	2.40369297860769	1.674513752426	4323688.2968426	2.09081805933502	4887139.34138632	2.5670838870669	2067940.95619097	1903770.79845656	-0.933581150147406	0.0674997325621453	-13.8308866525935	5.83248958258087e-41	1451	-0.774446749303456	-1.70802789945085	1.31494607247493	2.2236779319116	2.87131159619637	2.50840862522209	1.46859932793169	4323688.2968426	2.09081805933502	4144221.81576126
AEVLDCLYCK	Q9DA16	Izumo2	Izumo2		AK006268;BC048526;	ENSMUST00000085422;	Izumo sperm-egg fusion protein 2		NP_083593.1;	Mm.273301;	mmu:75510;	integral to membrane	GO:0016021		Izumo family	Membrane; Single-pass membrane protein.	-0.0365639913991232	0.269373393484763	-0.135737204503055	0.893456832345244	19	-0.308107192720449	-0.344671184119573	0.617211982925525	0.553075502179674	1.79507494549628	0.671568621828024	1.94843274625199	647692.122249676	0.535985930896349	586371.873914265	0.478636474256909	1208412.54390114	1225088.15239085	0.103247549851546	0.274353851237769	0.376329872483061	0.710447007528734	21	-0.308107192720449	-0.204859642868903	0.657877424154171	0.553075502179674	1.79507494549628	0.76474511671998	3.73301986672586	647692.122249676	0.535985930896349	850365.215215189
AEVLDSTK	Q9CR68	Uqcrfs1	Uqcrfs1	IPI00133240;	AK003966;AK012180;AK014470;AK153139;AK152391;AL611944;BC019934;	ENSMUST00000042834;	Cytochrome b-c1 complex subunit Rieske, mitochondrial (EC 1.10.2.2) (Complex III subunit 5) (Cytochrome b-c1 complex subunit 5) (Rieske iron-sulfur protein) (RISP) (Ubiquinol-cytochrome c reductase iron-sulfur subunit) [Cleaved into: Cytochrome b-c1 complex subunit 11 (Complex III subunit IX) (Ubiquinol-cytochrome c reductase 8 kDa protein)]		NP_079986.1;	Mm.181933;	mmu:66694;	2 iron, 2 sulfur cluster binding; electron transport chain; integral to membrane; metal ion binding; mitochondrial inner membrane; mitochondrial respiratory chain complex III; response to antibiotic; response to drug; response to hormone stimulus; ubiquinol-cytochrome-c reductase activity	GO:0051537; GO:0022900; GO:0016021; GO:0046872; GO:0005743; GO:0005750; GO:0046677; GO:0042493; GO:0009725; GO:0008121			Mitochondrion inner membrane.	-0.011325971772942	0.0813656910380015	-0.139198372538277	0.889357228356596	439	1.47830978875512	1.46698381698218	0.87444461849769	2.24684469754225	1.51987405794986	2.12973463529269	1.45177786601211	18291332.1768341	1.6824832471925	14107123.7440277	1.40412955595147	10871628.1171632	10046881.8452215	-0.0344045583360252	0.0773436299050584	-0.444827303531756	0.656643827890995	483	1.47830978875512	1.44390523041909	0.869900966485075	2.24684469754225	1.51987405794986	2.271303666449	1.57302821445543	18291332.1768341	1.6824832471925	20694466.7111109
AEVLMGDVPDR	F6S0H0	Fam98c	Fam98c	IPI00919181;		ENSMUST00000144795;	0										0.93348267284978	1.15062821443663	0.811280882162996	0.427251103048939	19	-1.15162143059928	-0.218138757749497	2.63642044470386	2.68400338729045	2.33062994138078	2.33392547592469	10.6992700426253	1841594.4679369	1.01368824722551	1447048.06241625	0.658212488219831	1816726.66421593	2198451.24228783	0.150899259177424	1.09864897448659	0.137349838466778	0.892062652291968	21	-1.15162143059928	-1.00072217142185	2.63446769244898	2.68400338729045	2.33062994138078	2.51269381135247	2.51088052519348	1841594.4679369	1.01368824722551	1215684.06436097
AEVSELPNVVR	Q9CZD3	Gars	Gars	IPI00112555;	AK146238;AK165857;BC021747;	ENSMUST00000003572;	Glycine--tRNA ligase (EC 6.1.1.14) (Diadenosine tetraphosphate synthetase) (AP-4-A synthetase) (Glycyl-tRNA synthetase) (GlyRS)		NP_851009.2;	Mm.250004;	mmu:353172;	ATP binding; diadenosine tetraphosphate biosynthetic process; glycine-tRNA ligase activity; glycyl-tRNA aminoacylation; mitochondrion; protein dimerization activity; secretory granule	GO:0005524; GO:0015966; GO:0004820; GO:0006426; GO:0005739; GO:0046983; GO:0030141		Class-II aminoacyl-tRNA synthetase family	Cytoplasm. Mitochondrion.	-0.047721851637736	0.0950217614419364	-0.502220237907258	0.615838661376504	339	-1.16110058973164	-1.20882244136938	0.897691657484293	2.13183561104623	1.83604730709762	2.23283659970936	1.84711709784273	1876047.3405747	1.3675746734367	1868126.12493667	1.31383617558032	1371806.14485951	1421886.65501734	0.0544270843621303	0.0867810748033223	0.627176887189771	0.530927000955763	373	-1.16110058973164	-1.10667350536951	0.857992334335184	2.13183561104623	1.83604730709762	1.93555938153082	1.74898863317827	1876047.3405747	1.3675746734367	1716816.25922214
AEVSSGSER	Q9R0Y5	Ak1	Ak1	IPI00128209;IPI00750256;	AJ010108;AJ010109;DQ486026;AK046613;AK089270;AL772271;AL772271;AL772271;BC014802;BC054366;	ENSMUST00000068271;ENSMUST00000113277;ENSMUST00000113278;ENSMUST00000156578;	Adenylate kinase isoenzyme 1 (AK 1) (EC 2.7.4.3) (ATP-AMP transphosphorylase 1) (Myokinase)		NP_001185719.1;NP_001185720.1;NP_001185721.1;NP_067490.1;	Mm.29189;	mmu:11636;	ATP binding; ATP metabolic process; adenylate kinase activity; cell cycle arrest; cytoplasm; outer dense fiber; plasma membrane; sperm flagellum	GO:0005524; GO:0046034; GO:0004017; GO:0007050; GO:0005737; GO:0001520; GO:0005886; GO:0036126		Adenylate kinase family	Cytoplasm.	0.277590925949436	0.0888005569212817	3.12600433571052	0.00185237038258974	639	1.2673400200428	1.54493094599224	1.15098676656207	3.06515982242492	2.41857731465105	2.85682559767725	1.84916070526533	41352136.0102245	2.13597844938775	44874102.1557107	2.04001358633074	19359809.5627218	21996962.4008354	0.341373015893435	0.0794046276921557	4.29915769162606	1.95665731685468e-05	703	1.2673400200428	1.60871303593623	1.07709677439081	3.06515982242492	2.41857731465105	2.93788117391909	1.82623072499025	41352136.0102245	2.13597844938775	40259326.2002997
AEVVGKPSPEFFK	Q9D7I5	Lhpp	Lhpp	IPI00110351;IPI00856607;	AK009207;AK140229;BC065789;	ENSMUST00000033241;	Phospholysine phosphohistidine inorganic pyrophosphate phosphatase (EC 3.1.3.-) (EC 3.6.1.1)		NP_083885.1;	Mm.276721;	mmu:76429;	cytosol; inorganic diphosphatase activity; magnesium ion binding; nucleus; phosphohistidine phosphatase activity; protein dephosphorylation	GO:0005829; GO:0004427; GO:0000287; GO:0005634; GO:0008969; GO:0006470		HAD-like hydrolase superfamily	Cytoplasm. Nucleus.	0.0456845518886839	0.326467656417641	0.139935920115287	0.889430827847912	39	-0.334903145106883	-0.289218593218199	1.05787611382982	1.89039828857154	5.64461193091581	1.4587595333692	5.04379582632383	2811904.25001051	1.21566533044834	2384599.71833023	1.16402050414059	2313057.86188166	2048589.10117809	0.247516502999526	0.314522870407544	0.786958680234621	0.435622145759207	43	-0.334903145106883	-0.0873866421073571	1.06659894717185	1.89039828857154	5.64461193091581	1.53933553604641	17.6152269834936	2811904.25001051	1.21566533044834	2962814.51320915
[truncated: 3,616 more rows]
[truncated: 87 more columns]
